# Supplementary material for: Electrochemical approach for upgrading the pollutant CS 2 : three-component N–H thiocarbamylation of sulfoximines
Source: Royal Society of Chemistry journal article supplement (doi:10.1039/d4qo01310g), 2024-01-01

## Supporting Information

### Electrochemical approach for upgrading the pollutant CS<sub>2</sub>: three component N-H thiocarbamylation of sulfoximines

Peng Qian\*, Wenjing Xiong, Qian Meng, Jinxiu Liu, Xiuyan Li, Liangquan Sheng\*

Biomass-derived Functional Oligosaccharides Engineering Technology Research Center of Anhui Province, School of Chemistry and Material Engineering, Engineering Research Center of Biomass Conversion and Pollution Prevention of Anhui Educational Institutions, Fuyang Normal University, Fuyang, Anhui, 236037, P. R. China.

E-mail: shenglq2015@163.com; qianpeng@mail.ustc.edu.cn

### Table of Contents

|                                       |     |
|---------------------------------------|-----|
| General information.....              | S2  |
| Experimental section.....             | S2  |
| Detail descriptions for products..... | S4  |
| Copies of product NMR spectra.....    | S14 |
| Crystal structure data.....           | S42 |

---

## General information:

All products were characterized by  $^1\text{H}$  NMR and  $^{13}\text{C}$  NMR, using TMS as an internal reference ( $^1\text{H}$  NMR: 400 MHz,  $^{13}\text{C}$  NMR: 100 MHz). HRMS (ESI) data were recorded on a Q-TOF Premier. Flash column chromatography was performed using silica gel (200-300 mesh). All the compounds **1** were synthesized according to the previously reported procedures,<sup>1</sup> and compounds **2** were purchased from commercial supplies and used without purification.

## Experimental section

**Representative procedures for the electrochemical N-H thiocarbamylation (Synthesis of 3aa as an example):** An undivided cell was equipped with a magnet stirrer, two platinum plates (1.0 x 1.0 cm<sup>2</sup>) electrodes as the working electrode and counter electrode. In the electrolytic cell, a mixture of iminodiphenyl- $\lambda^6$ -sulfanone **1a** (0.3 mmol, 65.1 mg, 1.0 equiv), pyrrolidine **2a** (0.6 mmol, 2.0 equiv), CS<sub>2</sub> (0.72 mmol, 2.4 equiv), *n*-Bu<sub>4</sub>NI (0.30 mmol, 110.8 mg, 1.0 equiv), K<sub>2</sub>CO<sub>3</sub> (0.60 mmol, 87.0 mg, 2.0 equiv), CH<sub>3</sub>CN (3.0 mL) was allowed to stir and electrolyze at a constant current condition (5 mA) at room temperature. After the reaction was completed (about 6 h), the solvent was removed with a rotary evaporator and the residue was purified by column chromatography on silica gel to afford the desired product **3aa**. The product was dried under high vacuum for at least 0.5 h before it was weighed and characterized by NMR spectroscopy.

**Gram-scale synthesis of 3aa:** An undivided cell was equipped with a magnet stirrer, two platinum plates (1.5 x 1.5 cm<sup>2</sup>) electrodes as the working electrode and counter electrode. In the electrolytic cell, a mixture of iminodiphenyl- $\lambda^6$ -sulfanone **1a** (6 mmol, 1.30 g, 1.0 equiv), pyrrolidine **2a** (12 mmol, 2.0 equiv), CS<sub>2</sub> (14.4 mmol, 2.4 equiv), *n*-Bu<sub>4</sub>NI (6 mmol, 2.22 g, 1.0 equiv), K<sub>2</sub>CO<sub>3</sub> (12 mmol, 1.66 g, 2.0 equiv), CH<sub>3</sub>CN (60.0 mL) was allowed to stir and electrolyze at a constant current condition (11 mA) at room temperature. After the reaction was completed (about 53 h), the solvent was removed with a rotary evaporator and the residue was purified by column chromatography on silica gel to afford the desired product **3aa**. The product was dried under high vacuum for at least 0.5 h before it was weighed and characterized by NMR spectroscopy (970 mg, 50%).

Photographic depiction of the electrolysis setup (3aa as an example):

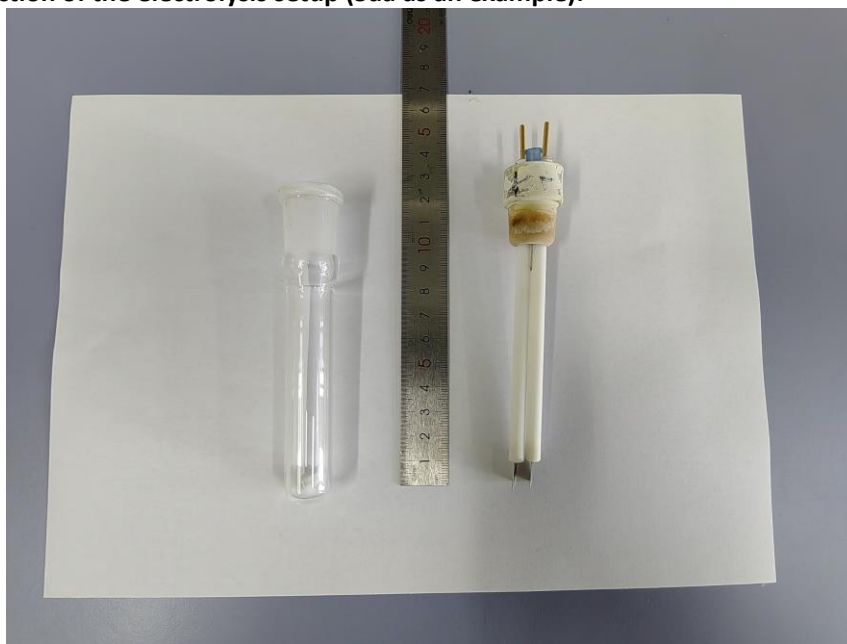

Figure S1 Electrodes and electrolysis cell

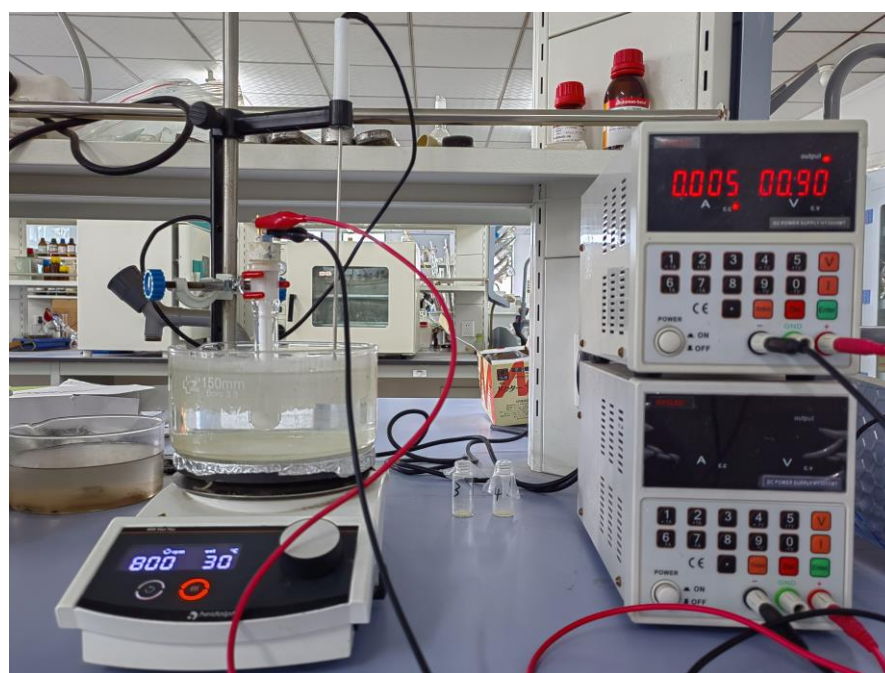

Figure S2 Electrolysis setup

## Detail descriptions for products

### *Diphenyl(((pyrrolidine-1-carbonothioyl)thio)imino)- $\lambda^6$ -sulfanone (3aa)*

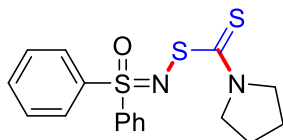

The title compound was prepared according to the general working procedure and purified by column chromatography (petroleum ether / ethyl acetate = 5:1) to give the product as a pale yellow solid in 74% yield (80.9 mg);  $^1\text{H}$  NMR ( $\text{CDCl}_3$ , 400 MHz, ppm):  $\delta$  = 8.26-8.23 (m, 4H), 7.56-7.47 (m, 6H), 3.92 (t,  $J$  = 8.0 Hz, 2H), 3.44 (t,  $J$  = 8.0 Hz, 2H), 2.02-1.96 (m, 2H), 1.92-1.85 (m, 2H);  $^{13}\text{C}$  NMR ( $\text{CDCl}_3$ , 100 MHz, ppm):  $\delta$  = 196.8, 139.3, 133.4, 129.4, 129.3, 55.1, 49.0, 26.4, 23.7. HRMS (ESI-TOF)  $m/z$ :  $[\text{M} + \text{Na}]^+$  Calcd for  $\text{C}_{17}\text{H}_{18}\text{N}_2\text{OS}_3\text{Na}$  385.0479; Found: 385.0484.

### *Methyl(phenyl)(((pyrrolidine-1-carbonothioyl)thio)imino)- $\lambda^6$ -sulfanone (3ba)*

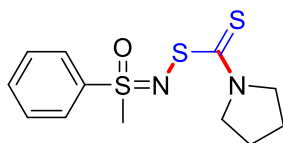

The title compound was prepared according to the general working procedure and purified by column chromatography (petroleum ether / ethyl acetate = 3:1) to give the product as a pale yellow oil in 56% yield (50.0 mg);  $^1\text{H}$  NMR ( $\text{CDCl}_3$ , 400 MHz, ppm):  $\delta$  = 8.36-8.33 (m, 2H), 7.68-7.63 (m, 1H), 7.60-7.56 (m, 2H), 3.94-3.91 (m, 2H), 3.60-3.50 (m, 2H), 3.35 (s, 3H), 2.10-2.02 (m, 2H), 1.96-1.89 (m, 2H);  $^{13}\text{C}$  NMR ( $\text{CDCl}_3$ , 100 MHz, ppm):  $\delta$  = 197.8, 138.7, 134.0, 129.4, 128.9, 55.1, 48.8, 42.4, 26.4, 23.7. HRMS (ESI-TOF)  $m/z$ :  $[\text{M} + \text{Na}]^+$  Calcd for  $\text{C}_{12}\text{H}_{16}\text{N}_2\text{OS}_3\text{Na}$  323.0322; Found: 323.0327.

### *Ethyl(phenyl)(((pyrrolidine-1-carbonothioyl)thio)imino)- $\lambda^6$ -sulfanone (3ca)*

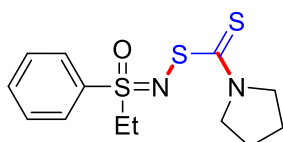

The title compound was prepared according to the general working procedure and purified by column chromatography (petroleum ether / ethyl acetate = 3:1) to give the product as a pale yellow oil in 49% yield (46.4 mg);  $^1\text{H}$  NMR ( $\text{CDCl}_3$ , 400 MHz, ppm):  $\delta$  = 8.22-8.19 (m, 2H), 7.66-7.63 (m, 1H), 7.58-7.55 (m, 2H), 3.93-3.90 (m, 2H), 3.75-3.66 (m, 1H), 3.53-3.50 (m, 2H), 3.48-3.39 (m, 1H), 2.07-2.00 (m, 2H), 1.94-1.87 (m, 2H), 1.24-1.21 (m,

3H);  $^{13}\text{C}$  NMR ( $\text{CDCl}_3$ , 100 MHz, ppm):  $\delta$  = 198.0, 136.3, 133.9, 129.6, 129.3, 55.1, 49.3, 48.9, 26.4, 23.6, 8.1. HRMS (ESI-TOF)  $m/z$ :  $[\text{M} + \text{Na}]^+$  Calcd for  $\text{C}_{13}\text{H}_{18}\text{N}_2\text{OS}_3\text{Na}$  337.0479; Found: 337.0484.

*Methyl(((pyrrolidine-1-carbonothioyl)thio)imino)(p-tolyl)- $\lambda^6$ -sulfanone (3da)*

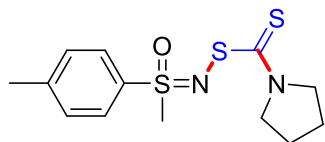

The title compound was prepared according to the general working procedure and purified by column chromatography (petroleum ether / ethyl acetate = 3:1) to give the product as a pale yellow solid in 92% yield (87.0 mg);  $^1\text{H}$  NMR ( $\text{CDCl}_3$ , 400 MHz, ppm):  $\delta$  = 8.21 (d,  $J$  = 8.0 Hz, 2H), 7.37 (d,  $J$  = 8.0 Hz, 2H), 3.95-3.92 (m, 2H), 3.58-3.50 (m, 2H), 3.33 (s, 3H), 2.45 (s, 3H), 2.09-2.05 (m, 2H), 1.97-1.92 (m, 2H);  $^{13}\text{C}$  NMR ( $\text{CDCl}_3$ , 100 MHz, ppm):  $\delta$  = 198.0, 145.0, 135.7, 130.0, 129.0, 55.1, 48.9, 42.6, 26.5, 23.7, 21.8. HRMS (ESI-TOF)  $m/z$ :  $[\text{M} + \text{Na}]^+$  Calcd for  $\text{C}_{13}\text{H}_{18}\text{N}_2\text{OS}_3\text{Na}$  337.0479; Found: 337.0484.

*(4-Methoxyphenyl)(methyl)(((pyrrolidine-1-carbonothioyl)thio)imino)- $\lambda^6$ -sulfanone (3ea)*

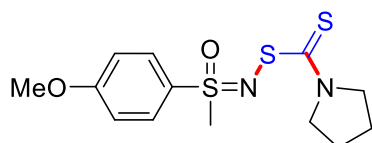

The title compound was prepared according to the general working procedure and purified by column chromatography (petroleum ether / ethyl acetate = 3:1) to give the product as a pale yellow oil in 87% yield (86.2 mg);  $^1\text{H}$  NMR ( $\text{CDCl}_3$ , 400 MHz, ppm):  $\delta$  = 8.28-8.24 (m, 2H), 7.04-7.01 (m, 2H), 3.93-3.90 (m, 2H), 3.86 (s, 3H), 3.58-3.51 (m, 2H), 3.31 (s, 3H), 2.09-2.03 (m, 2H), 1.95-1.89 (m, 2H);  $^{13}\text{C}$  NMR ( $\text{CDCl}_3$ , 100 MHz, ppm):  $\delta$  = 198.0, 164.0, 131.2, 129.8, 114.6, 55.8, 55.1, 48.8, 42.5, 26.4, 23.7. HRMS (ESI-TOF)  $m/z$ :  $[\text{M} + \text{Na}]^+$  Calcd for  $\text{C}_{13}\text{H}_{18}\text{N}_2\text{O}_2\text{S}_3\text{Na}$  353.0428; Found: 353.0433.

*(3-Methoxyphenyl)(methyl)(((pyrrolidine-1-carbonothioyl)thio)imino)- $\lambda^6$ -sulfanone (3fa)*

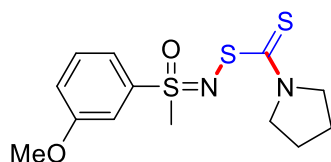

The title compound was prepared according to the general working procedure and purified by column chromatography (petroleum ether / ethyl acetate = 3:1) to give the product as a pale yellow oil in 73% yield (71.8 mg);  $^1\text{H}$  NMR ( $\text{CDCl}_3$ , 400 MHz, ppm):  $\delta$  = 8.09-8.07 (m, 1H), 7.83 (d,  $J$  = 8.0 Hz, 1H), 7.46 (t,  $J$  = 8.0 Hz, 1H), 7.19-7.16 (m, 1H), 3.94-3.91 (m, 2H), 3.89 (s, 3H), 3.60-3.50 (m, 2H), 3.35 (s, 3H), 2.11-2.04 (m, 2H), 1.97-1.90 (m,

2H);  $^{13}\text{C}$  NMR ( $\text{CDCl}_3$ , 100 MHz, ppm):  $\delta$  = 197.9, 160.2, 139.8, 130.2, 121.4, 121.0, 113.0, 56.0, 55.1, 48.8, 42.3, 26.4, 23.7. HRMS (ESI-TOF)  $m/z$ :  $[\text{M} + \text{Na}]^+$  Calcd for  $\text{C}_{13}\text{H}_{18}\text{N}_2\text{O}_2\text{S}_3\text{Na}$  353.0428; Found: 353.0433.

*(4-Fluorophenyl)(methyl)((pyrrolidine-1-carbonothioyl)thio)imino*- $\lambda^6$ -sulfanone (**3ga**)

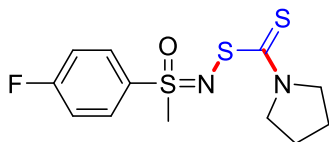

The title compound was prepared according to the general working procedure and purified by column chromatography (petroleum ether / ethyl acetate = 3:1) to give the product as a pale yellow oil in 75% yield (71.5 mg);  $^1\text{H}$  NMR ( $\text{CDCl}_3$ , 400 MHz, ppm):  $\delta$  = 8.45-8.42 (m, 2H), 7.30-7.25 (m, 2H), 3.95 (t,  $J$  = 8.0 Hz, 2H), 3.62-3.51 (m, 2H), 3.38 (s, 3H), 2.13-2.08 (m, 2H), 2.00-1.94 (m, 2H);  $^{13}\text{C}$  NMR ( $\text{CDCl}_3$ , 100 MHz, ppm):  $\delta$  = 197.6, 166.2 (d,  $J$  = 255.0 Hz), 134.5, 132.1 (d,  $J$  = 10.0 Hz), 116.7 (d,  $J$  = 22.0 Hz), 55.2, 48.9, 42.4, 26.4, 23.7.  $^{19}\text{F}$  NMR ( $\text{CDCl}_3$ , 376 MHz, ppm):  $\delta$  = 103.4. HRMS (ESI-TOF)  $m/z$ :  $[\text{M} + \text{Na}]^+$  Calcd for  $\text{C}_{12}\text{H}_{15}\text{N}_2\text{OFS}_3\text{Na}$  341.0228; Found: 341.0232.

*(4-Chlorophenyl)(methyl)((pyrrolidine-1-carbonothioyl)thio)imino*- $\lambda^6$ -sulfanone (**3ha**)

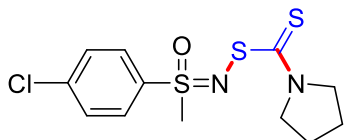

The title compound was prepared according to the general working procedure and purified by column chromatography (petroleum ether / ethyl acetate = 3:1) to give the product as a pale yellow solid in 51% yield (51.0 mg);  $^1\text{H}$  NMR ( $\text{CDCl}_3$ , 400 MHz, ppm):  $\delta$  = 8.34-8.31 (m, 2H), 7.57-7.54 (m, 2H), 3.94-3.91 (m, 2H), 3.59-3.49 (m, 2H), 3.35 (s, 3H), 2.11-2.04 (m, 2H), 1.97-1.90 (m, 2H);  $^{13}\text{C}$  NMR ( $\text{CDCl}_3$ , 100 MHz, ppm):  $\delta$  = 197.4, 140.8, 137.2, 130.6, 129.7, 55.2, 48.8, 42.5, 26.4, 23.7. HRMS (ESI-TOF)  $m/z$ :  $[\text{M} + \text{Na}]^+$  Calcd for  $\text{C}_{12}\text{H}_{15}\text{N}_2\text{OClS}_3\text{Na}$  356.9933; Found: 356.9937.

*(3-Chlorophenyl)(methyl)((pyrrolidine-1-carbonothioyl)thio)imino*- $\lambda^6$ -sulfanone (**3ia**)

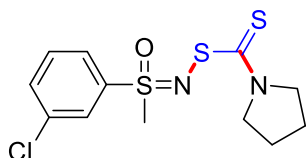

The title compound was prepared according to the general working procedure and purified by column chromatography (petroleum ether / ethyl acetate = 3:1) to give the product as a pale yellow oil in 50% yield (49.6 mg);  $^1\text{H}$  NMR ( $\text{CDCl}_3$ , 400 MHz, ppm):  $\delta$  = 8.36-8.35 (m, 1H), 8.29-8.26 (m, 1H), 7.64-7.61 (m, 1H), 7.53 (t,  $J$  = 8.0 Hz, 1H), 3.94-3.91 (m, 2H), 3.59-3.49 (m, 2H), 3.37 (s, 3H), 2.11-2.04 (m, 2H), 1.97-1.90 (m, 2H);  $^{13}\text{C}$  NMR ( $\text{CDCl}_3$ ,

100 MHz, ppm):  $\delta$  = 197.3, 140.5, 135.5, 134.2, 130.7, 129.0, 127.2, 55.2, 48.9, 42.5, 26.4, 23.7. HRMS (ESI-TOF) m/z:  $[M + Na]^+$  Calcd for  $C_{12}H_{15}N_2OClS_3Na$  356.9933; Found: 356.9937.

*(2-Chlorophenyl)(methyl)((pyrrolidine-1-carbonothioyl)thio)imino*- $\lambda^6$ -sulfanone (**3ja**)

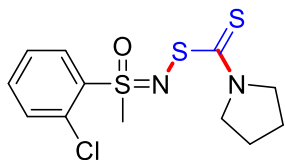

The title compound was prepared according to the general working procedure and purified by column chromatography (petroleum ether / ethyl acetate = 4:1) to give the product as a pale yellow oil in 39% yield (39.0 mg);  $^1H$  NMR ( $CDCl_3$ , 400 MHz, ppm):  $\delta$  = 8.39-8.37 (m, 1H), 7.58-7.54 (m, 2H), 7.50-7.46 (m, 1H), 3.93-3.90 (m, 2H), 3.65-3.57 (m, 2H), 3.57 (s, 3H), 2.08-2.00 (m, 2H), 1.94-1.87 (m, 2H);  $^{13}C$  NMR ( $CDCl_3$ , 100 MHz, ppm):  $\delta$  = 197.1, 136.7, 134.9, 132.7, 132.6, 132.3, 127.6, 55.3, 49.5, 42.3, 26.6, 23.7. HRMS (ESI-TOF) m/z:  $[M + Na]^+$  Calcd for  $C_{12}H_{15}N_2OClS_3Na$  356.9933; Found: 356.9938.

*(4-Bromophenyl)(methyl)((pyrrolidine-1-carbonothioyl)thio)imino*- $\lambda^6$ -sulfanone (**3ka**)

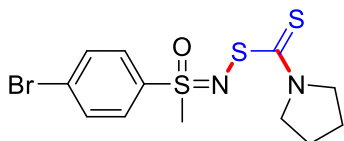

The title compound was prepared according to the general working procedure and purified by column chromatography (petroleum ether / ethyl acetate = 4:1) to give the product as a pale yellow oil in 50% yield (57.1 mg);  $^1H$  NMR ( $CDCl_3$ , 400 MHz, ppm):  $\delta$  = 8.26 (d,  $J$  = 8.0 Hz, 2H), 7.73 (d,  $J$  = 8.0 Hz, 2H), 3.94 (t,  $J$  = 8.0 Hz, 2H), 3.60-3.50 (m, 2H), 3.36 (s, 3H), 2.12-2.06 (m, 2H), 1.99-1.92 (m, 2H);  $^{13}C$  NMR ( $CDCl_3$ , 100 MHz, ppm):  $\delta$  = 197.5, 137.8, 132.7, 130.6, 129.6, 55.2, 48.9, 42.5, 26.5, 23.7. HRMS (ESI-TOF) m/z:  $[M + Na]^+$  Calcd for  $C_{12}H_{15}N_2OBrS_3Na$  400.9428; Found: 400.9433.

*(3-Bromophenyl)(methyl)((pyrrolidine-1-carbonothioyl)thio)imino*- $\lambda^6$ -sulfanone (**3la**)

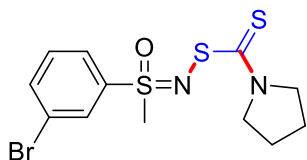

The title compound was prepared according to the general working procedure and purified by column chromatography (petroleum ether / ethyl acetate = 4:1) to give the product as a pale yellow oil in 46% yield (52.4 mg);  $^1H$  NMR ( $CDCl_3$ , 400 MHz, ppm):  $\delta$  = 8.50-8.49 (m, 1H), 8.34-8.31 (m, 1H), 7.79-7.76 (m, 1H), 7.46 (t,  $J$  = 8.0

Hz, 1H), 3.94-3.91 (m, 2H), 3.58-3.51 (m, 2H), 3.37 (s, 3H), 2.11-2.04 (m, 2H), 1.97-1.90 (m, 2H);  $^{13}\text{C}$  NMR ( $\text{CDCl}_3$ , 100 MHz, ppm):  $\delta$  = 197.3, 140.7, 137.1, 131.8, 130.9, 127.7, 123.2, 55.2, 48.9, 42.6, 26.4, 23.7. HRMS (ESI-TOF)  $m/z$ :  $[\text{M} + \text{Na}]^+$  Calcd for  $\text{C}_{12}\text{H}_{15}\text{N}_2\text{OBrS}_3\text{Na}$  400.9428; Found: 400.9433.

*(2-Bromophenyl)(methyl)((pyrrolidine-1-carbonothioyl)thio)imino*- $\lambda^6$ -sulfanone (**3ma**)

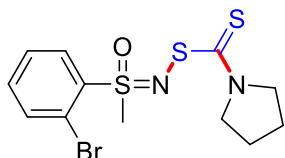

The title compound was prepared according to the general working procedure and purified by column chromatography (petroleum ether / ethyl acetate = 4:1) to give the product as a pale yellow oil in 31% yield (35.6 mg);  $^1\text{H}$  NMR ( $\text{CDCl}_3$ , 400 MHz, ppm):  $\delta$  = 8.44-8.41 (m, 1H), 7.78-7.76 (m, 1H), 7.55-7.51 (m, 1H), 7.49-7.44 (m, 1H), 3.91 (t,  $J$  = 8.0 Hz, 2H), 3.62-3.59 (m, 2H), 3.57 (s, 3H), 2.07-1.99 (m, 2H), 1.93-1.86 (m, 2H);  $^{13}\text{C}$  NMR ( $\text{CDCl}_3$ , 100 MHz, ppm):  $\delta$  = 197.0, 138.2, 135.9, 134.8, 133.1, 128.2, 120.8, 55.3, 49.5, 42.0, 26.5, 23.6. HRMS (ESI-TOF)  $m/z$ :  $[\text{M} + \text{Na}]^+$  Calcd for  $\text{C}_{12}\text{H}_{15}\text{N}_2\text{OBrS}_3\text{Na}$  400.9428; Found: 400.9432.

*4-(S-methyl-N-((pyrrolidine-1-carbonothioyl)thio)sulfonimidoyl)benzonitrile* (**3na**)

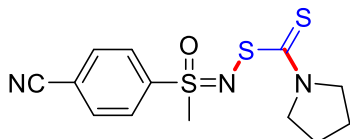

The title compound was prepared according to the general working procedure and purified by column chromatography (petroleum ether / ethyl acetate = 3:1) to give the product as a pale yellow oil in 27% yield (26.0 mg);  $^1\text{H}$  NMR ( $\text{CDCl}_3$ , 400 MHz, ppm):  $\delta$  = 8.55 (d,  $J$  = 8.0 Hz, 2H), 7.90-7.87 (m, 2H), 3.94-3.91 (m, 2H), 3.59-3.49 (m, 2H), 3.40 (s, 3H), 2.13-2.06 (m, 2H), 1.99-1.92 (m, 2H);  $^{13}\text{C}$  NMR ( $\text{CDCl}_3$ , 100 MHz, ppm):  $\delta$  = 196.9, 143.2, 133.1, 130.0, 117.8, 117.3, 55.3, 48.9, 42.3, 26.4, 23.7. HRMS (ESI-TOF)  $m/z$ :  $[\text{M} + \text{Na}]^+$  Calcd for  $\text{C}_{13}\text{H}_{15}\text{N}_3\text{OS}_3\text{Na}$  348.0275; Found: 348.0280.

*Benzyl(methyl)((pyrrolidine-1-carbonothioyl)thio)imino*- $\lambda^6$ -sulfanone (**3oa**)

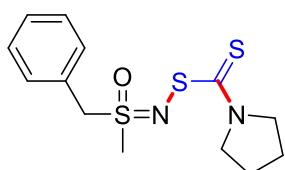

The title compound was prepared according to the general working procedure and purified by column chromatography (petroleum ether / ethyl acetate = 1:1) to give the product as a pale yellow oil in 45% yield (42.4



mg);  $^1\text{H}$  NMR ( $\text{CDCl}_3$ , 400 MHz, ppm):  $\delta$  = 7.42-7.46 (m, 2H), 7.41-7.38 (m, 3H), 4.76-4.66 (m, 2H), 3.94-3.91 (m, 2H), 3.57-3.54 (m, 2H), 3.01 (s, 3H), 2.12-2.05 (m, 2H), 1.97-1.90 (m, 2H);  $^{13}\text{C}$  NMR ( $\text{CDCl}_3$ , 100 MHz, ppm):  $\delta$  = 198.7, 131.1, 129.3, 129.2, 128.2, 60.9, 55.3, 48.9, 38.2, 26.5, 23.7. HRMS (ESI-TOF)  $m/z$ :  $[\text{M} + \text{Na}]^+$  Calcd for  $\text{C}_{13}\text{H}_{18}\text{N}_2\text{OS}_3\text{Na}$  337.0479; Found: 337.0482.

*(((4-Methylpiperidine-1-carbonothioyl)thio)imino)diphenyl- $\lambda^6$ -sulfanone (3ab)*

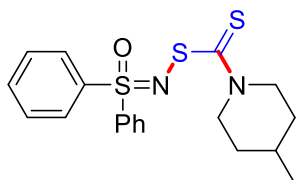

The title compound was prepared according to the general working procedure and purified by column chromatography (petroleum ether / ethyl acetate = 5:1) to give the product as pale yellow oil in 31% yield (35.3 mg);  $^1\text{H}$  NMR ( $\text{CDCl}_3$ , 400 MHz, ppm):  $\delta$  = 8.23-8.21 (m, 4H), 7.57-7.47 (m, 6H), 3.07-3.00 (m, 2H), 1.67-1.62 (m, 4H), 1.19-1.08 (m, 2H), 0.99-0.95 (m, 1H), 0.90 (d,  $J$  = 8.0 Hz, 3H);  $^{13}\text{C}$  NMR ( $\text{CDCl}_3$ , 100 MHz, ppm):  $\delta$  = 200.2, 139.2, 133.4, 129.3, 129.2, 51.4, 33.8, 31.0, 21.5. HRMS (ESI-TOF)  $m/z$ :  $[\text{M} + \text{Na}]^+$  Calcd for  $\text{C}_{19}\text{H}_{22}\text{N}_2\text{OS}_3\text{Na}$  413.0792; Found: 413.0795.

*(((Morpholine-4-carbonothioyl)thio)imino)diphenyl- $\lambda^6$ -sulfanone (3ac)*

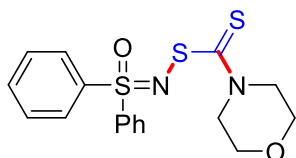

The title compound was prepared according to the general working procedure and purified by column chromatography (petroleum ether / ethyl acetate = 4:1) to give the product as a pale yellow oil in 57% yield (65.0 mg);  $^1\text{H}$  NMR ( $\text{CDCl}_3$ , 400 MHz, ppm):  $\delta$  = 8.16 (d,  $J$  = 8.0 Hz, 4H), 7.58-7.48 (m, 6H), 4.03 (s, 4H), 3.68 (s, 4H);  $^{13}\text{C}$  NMR ( $\text{CDCl}_3$ , 100 MHz, ppm):  $\delta$  = 201.8, 139.1, 133.5, 129.4, 129.0, 66.4, 51.0. HRMS (ESI-TOF)  $m/z$ :  $[\text{M} + \text{Na}]^+$  Calcd for  $\text{C}_{17}\text{H}_{18}\text{N}_2\text{O}_2\text{S}_3\text{Na}$  401.0428; Found: 401.0433.

*Diphenyl(((thiomorpholine-4-carbonothioyl)thio)imino)- $\lambda^6$ -sulfanone (3ad)*

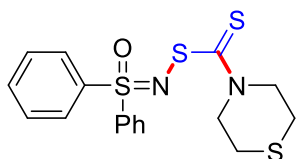

The title compound was prepared according to the general working procedure and purified by column chromatography (petroleum ether / ethyl acetate = 4:1) to give the product as a pale yellow solid in 63% yield

(74.0 mg);  $^1\text{H}$  NMR ( $\text{CDCl}_3$ , 400 MHz, ppm):  $\delta$  = 8.19 (d,  $J$  = 8.0 Hz, 4H), 7.58-7.48 (m, 6H), 4.26 (s, 4H), 2.61 (s, 4H);  $^{13}\text{C}$  NMR ( $\text{CDCl}_3$ , 100 MHz, ppm):  $\delta$  = 201.5, 139.0, 133.5, 129.4, 129.1, 53.8, 27.1. HRMS (ESI-TOF)  $m/z$ :  $[\text{M} + \text{Na}]^+$  Calcd for  $\text{C}_{17}\text{H}_{18}\text{N}_2\text{OS}_4\text{Na}$  417.0204; Found: 417.0200.

*(((Azocane-1-carbothioyl)thio)imino)diphenyl- $\lambda^6$ -sulfanone (3ae)*

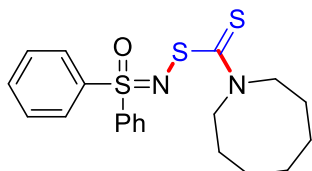

The title compound was prepared according to the general working procedure and purified by column chromatography (petroleum ether / ethyl acetate = 6:1) to give the product as a pale yellow oil in 42% yield (57.2 mg);  $^1\text{H}$  NMR ( $\text{CDCl}_3$ , 400 MHz, ppm):  $\delta$  = 8.29-8.27 (m, 4H), 7.56-7.51 (m, 2H), 7.50-7.46 (m, 4H), 4.05-4.02 (m, 2H), 3.57-3.51 (m, 2H), 1.94-1.90 (m, 2H), 1.64-1.61 (m, 2H), 1.45-1.31 (m, 6H);  $^{13}\text{C}$  NMR ( $\text{CDCl}_3$ , 100 MHz, ppm):  $\delta$  = 200.6, 139.0, 133.3, 129.4, 129.2, 56.4, 52.7, 26.7, 25.5. HRMS (ESI-TOF)  $m/z$ :  $[\text{M} + \text{Na}]^+$  Calcd for  $\text{C}_{20}\text{H}_{24}\text{N}_2\text{OS}_3\text{Na}$  427.0948; Found: 427.0953.

*(((Diethylcarbamothioyl)thio)imino)diphenyl- $\lambda^6$ -sulfanone (3af)*

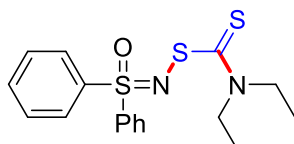

The title compound was prepared according to the general working procedure and purified by column chromatography (petroleum ether / ethyl acetate = 3:1) to give the product as a pale yellow solid in 64% yield (70.0 mg)  $^1\text{H}$  NMR ( $\text{CDCl}_3$ , 400 MHz, ppm):  $\delta$  = 8.27-8.24 (m, 4H), 7.55-7.51 (m, 2H), 7.50-7.45 (m, 4H), 4.02-3.45 (m, 4H), 1.13 (s, 6H);  $^{13}\text{C}$  NMR ( $\text{CDCl}_3$ , 100 MHz, ppm):  $\delta$  = 199.9, 139.1, 133.3, 129.3, 129.2, 12.2. HRMS (ESI-TOF)  $m/z$ :  $[\text{M} + \text{Na}]^+$  Calcd for  $\text{C}_{17}\text{H}_{20}\text{N}_2\text{OS}_3\text{Na}$  387.0635; Found: 387.0640.

*(((Dipropylcarbamothioyl)thio)imino)diphenyl- $\lambda^6$ -sulfanone (3ag)*

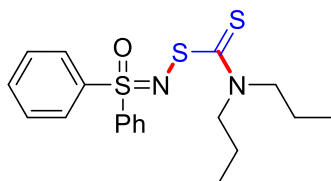

The title compound was prepared according to the general working procedure and purified by column chromatography (petroleum ether / ethyl acetate = 6:1) to give the product as a pale yellow oil in 41% yield (48.7 mg);  $^1\text{H}$  NMR ( $\text{CDCl}_3$ , 400 MHz, ppm):  $\delta$  = 8.29-8.26 (m, 4H), 7.56-7.51 (m, 2H), 7.50-7.46 (m, 4H), 3.90-3.39 (m, 4H), 1.65-1.60 (m, 4H), 0.83-0.82 (m, 6H);  $^{13}\text{C}$  NMR ( $\text{CDCl}_3$ , 100 MHz, ppm):  $\delta$  = 200.8, 139.0, 133.3, 129.4, 129.2, 11.2. HRMS (ESI-TOF) m/z:  $[\text{M} + \text{Na}]^+$  Calcd for  $\text{C}_{19}\text{H}_{24}\text{N}_2\text{OS}_3\text{Na}$  415.0948; Found: 415.0953.

*(((Dibutylcarbamothioyl)thio)imino)diphenyl- $\lambda^6$ -sulfanone (3ah)*

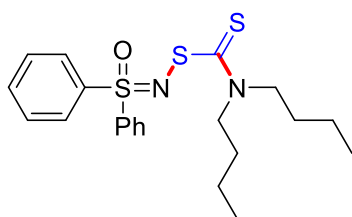

The title compound was prepared according to the general working procedure and purified by column chromatography (petroleum ether / ethyl acetate = 9:1) to give the product as a pale yellow oil in 81% yield (102.3 mg);  $^1\text{H}$  NMR ( $\text{CDCl}_3$ , 400 MHz, ppm):  $\delta$  = 8.27 (d,  $J$  = 8.0 Hz, 4H), 7.54-7.45 (m, 6H), 3.88 (s, 2H), 3.37 (s, 2H), 1.60-1.46 (m, 4H), 1.27-1.19 (m, 4H), 0.85 (s, 4H);  $^{13}\text{C}$  NMR ( $\text{CDCl}_3$ , 100 MHz, ppm):  $\delta$  = 200.5, 138.9, 133.3, 129.3, 129.2, 51.3, 28.9, 20.0, 13.8. HRMS (ESI-TOF) m/z:  $[\text{M} + \text{Na}]^+$  Calcd for  $\text{C}_{21}\text{H}_{28}\text{N}_2\text{OS}_3\text{Na}$  443.1261; Found: 443.1261.

*(((Dihexylcarbamothioyl)thio)imino)diphenyl- $\lambda^6$ -sulfanone (3ai)*

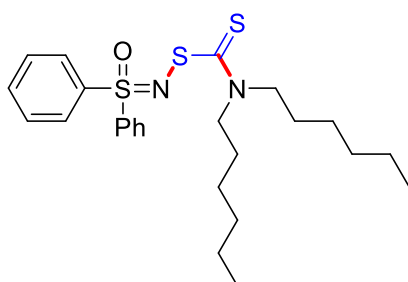

The title compound was prepared according to the general working procedure and purified by column chromatography (petroleum ether / ethyl acetate = 6:1) to give the product as a pale yellow solid in 49% yield (70.3 mg);  $^1\text{H}$  NMR ( $\text{CDCl}_3$ , 400 MHz, ppm):  $\delta$  = 8.28 (d,  $J$  = 8.0 Hz, 4H), 7.55-7.46 (m, 6H), 3.92-3.88 (m, 2H), 3.41-3.38 (m, 2H), 1.49-1.42 (m, 2H), 1.30-1.22 (m, 14H), 0.87-0.84 (m, 6H);  $^{13}\text{C}$  NMR ( $\text{CDCl}_3$ , 100 MHz, ppm):  $\delta$  = 200.4, 139.1, 133.3, 129.4, 129.2, 31.5, 26.5, 22.6, 14.1. HRMS (ESI-TOF) m/z:  $[\text{M} + \text{Na}]^+$  Calcd for  $\text{C}_{25}\text{H}_{36}\text{N}_2\text{OS}_3\text{Na}$  499.1887; Found: 499.1892.

*(((Methyl(p-tolyl)carbamothioyl)thio)imino)diphenyl- $\lambda^6$ -sulfanone (3aj)*

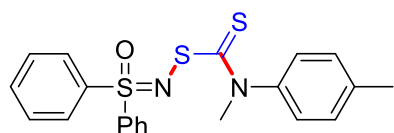

The title compound was prepared according to the general working procedure and purified by column chromatography (petroleum ether / ethyl acetate = 6:1) to give the product as a pale yellow oil in 63% yield (78.0 mg);  $^1\text{H}$  NMR ( $\text{CDCl}_3$ , 400 MHz, ppm):  $\delta$  = 8.23-8.20 (m, 4H), 7.57-7.52 (m, 2H), 7.49-7.46 (m, 4H), 7.10 (d,  $J$  = 8.0 Hz, 2H), 6.87 (d,  $J$  = 8.0 Hz, 2H), 3.69 (s, 3H), 2.33 (s, 3H);  $^{13}\text{C}$  NMR ( $\text{CDCl}_3$ , 100 MHz, ppm):  $\delta$  = 204.0, 140.9, 139.3, 139.2, 133.2, 130.3, 129.3, 129.2, 126.7, 46.0, 21.3. HRMS (ESI-TOF)  $m/z$ :  $[\text{M} + \text{Na}]^+$  Calcd for  $\text{C}_{21}\text{H}_{20}\text{N}_2\text{OS}_3\text{Na}$  435.0635; Found: 435.0640.

*(((4-Methoxyphenyl)(methyl)carbamothioyl)thio)imino)diphenyl- $\lambda^6$ -sulfanone (3ak)*

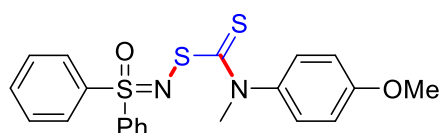

The title compound was prepared according to the general working procedure and purified by column chromatography (petroleum ether / ethyl acetate = 3:1) to give the product as a pale yellow oil in 47% yield (60.9 mg);  $^1\text{H}$  NMR ( $\text{CDCl}_3$ , 400 MHz, ppm):  $\delta$  = 8.22-8.19 (m, 4H), 7.56-7.52 (m, 2H), 7.50-7.45 (m, 4H), 6.92-6.88 (m, 2H), 6.81-6.77 (m, 2H), 3.77 (s, 3H), 3.67 (s, 3H);  $^{13}\text{C}$  NMR ( $\text{CDCl}_3$ , 100 MHz, ppm):  $\delta$  = 204.3, 159.9, 139.2, 136.0, 133.2, 129.2, 129.2, 128.1, 114.8, 55.6, 46.1. HRMS (ESI-TOF)  $m/z$ :  $[\text{M} + \text{Na}]^+$  Calcd for  $\text{C}_{21}\text{H}_{20}\text{N}_2\text{O}_2\text{S}_3\text{Na}$  451.0585; Found: 451.0589.

*4-(Methyl(((oxodiphenyl-16-sulfaneylidene)amino)thio)carbonothioyl)amino)benzonitrile (3al)*

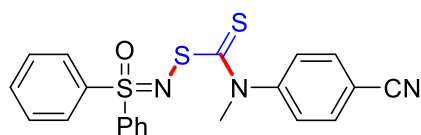

The title compound was prepared according to the general working procedure and purified by column chromatography (petroleum ether / ethyl acetate = 4:1) to give the product as a pale yellow oil in 39% yield (49.6 mg);  $^1\text{H}$  NMR ( $\text{CDCl}_3$ , 400 MHz, ppm):  $\delta$  = 8.10-8.08 (m, 4H), 7.59-7.55 (m, 4H), 7.51-7.47 (m, 4H), 7.21-7.19 (m, 2H), 3.69 (s, 3H);  $^{13}\text{C}$  NMR ( $\text{CDCl}_3$ , 100 MHz, ppm):  $\delta$  = 204.0, 148.0, 139.1, 133.5, 133.5, 129.3, 128.9, 128.0, 118.0, 112.4, 45.5. HRMS (ESI-TOF)  $m/z$ :  $[\text{M} + \text{Na}]^+$  Calcd for  $\text{C}_{21}\text{H}_{17}\text{N}_3\text{OS}_3\text{Na}$  446.0431; Found: 446.0434.

*Pyrrolidine-1-carbothioic dithioperoxyanhydride (4)<sup>2</sup>*

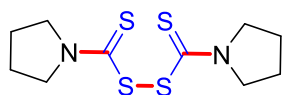

---

The title compound was prepared according to the general working procedure and purified by column chromatography (petroleum ether / ethyl acetate = 10:1) to give the product as a white solid in 56% yield (48.7 mg); <sup>1</sup>H NMR (CDCl<sub>3</sub>, 400 MHz, ppm): δ = 3.98-3.92 (m, 8H), 2.18-2.11 (m, 4H), 2.03-1.96 (m, 4H); <sup>13</sup>C NMR (CDCl<sub>3</sub>, 100 MHz, ppm): δ = 189.2, 57.0, 51.0, 26.7, 24.3.

## Reference

- (1) J.-F. Lohier, T. Glachet, H. Marzag, A.-C. Gaumont, V. Reboul. *Chem. Commun*, 2017, **53**, 2064-2064.
- (2) Q. Wang, C.-H. Xu, Y.-C. Wang, Y.-M. Pan, W.-G. Duan, H.-T. Tang, *Green Chem.*, 2022, **24**, 7362–7367.

## NMR Spectra of products

### 3aa-<sup>1</sup>H NMR

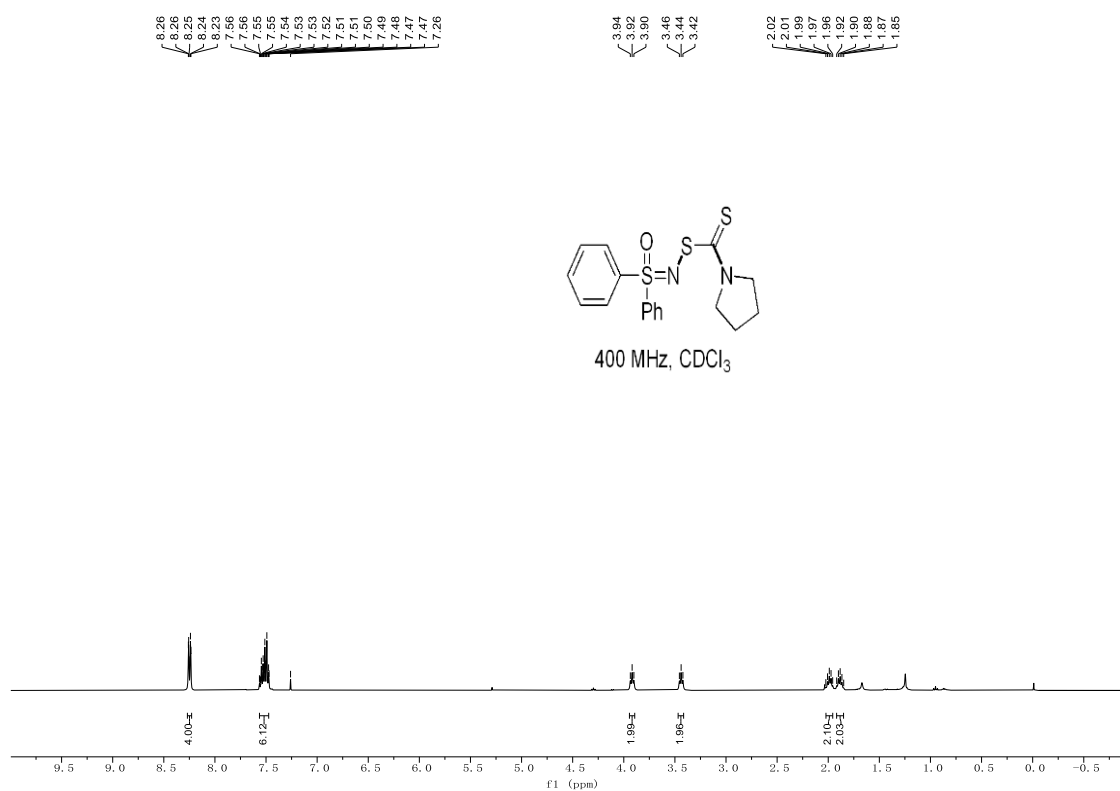

### 3aa-<sup>13</sup>C NMR

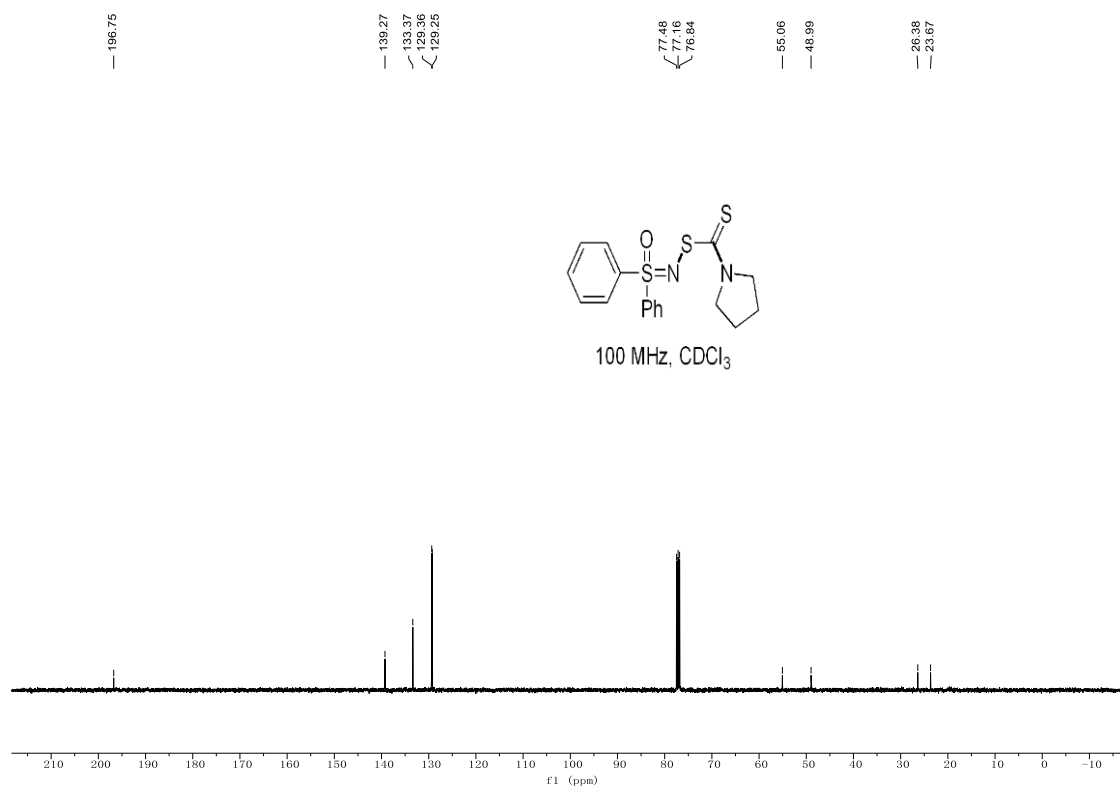

### 3ba-<sup>1</sup>H NMR

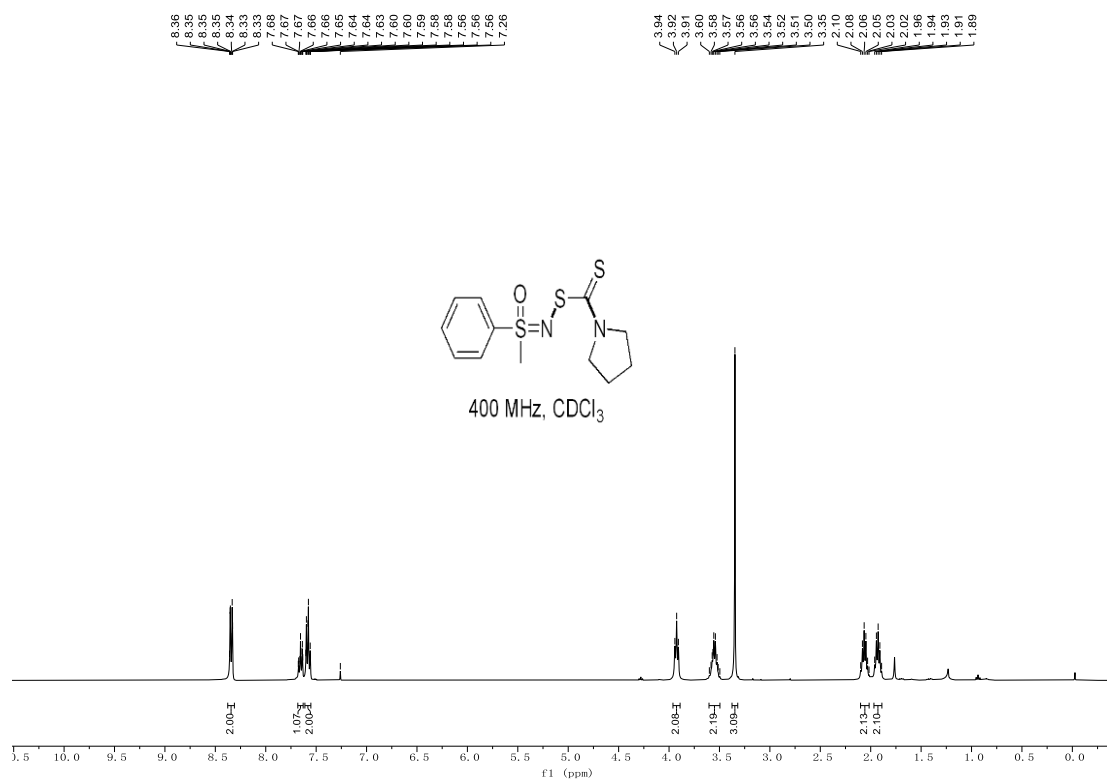

### 3ba-<sup>13</sup>C NMR

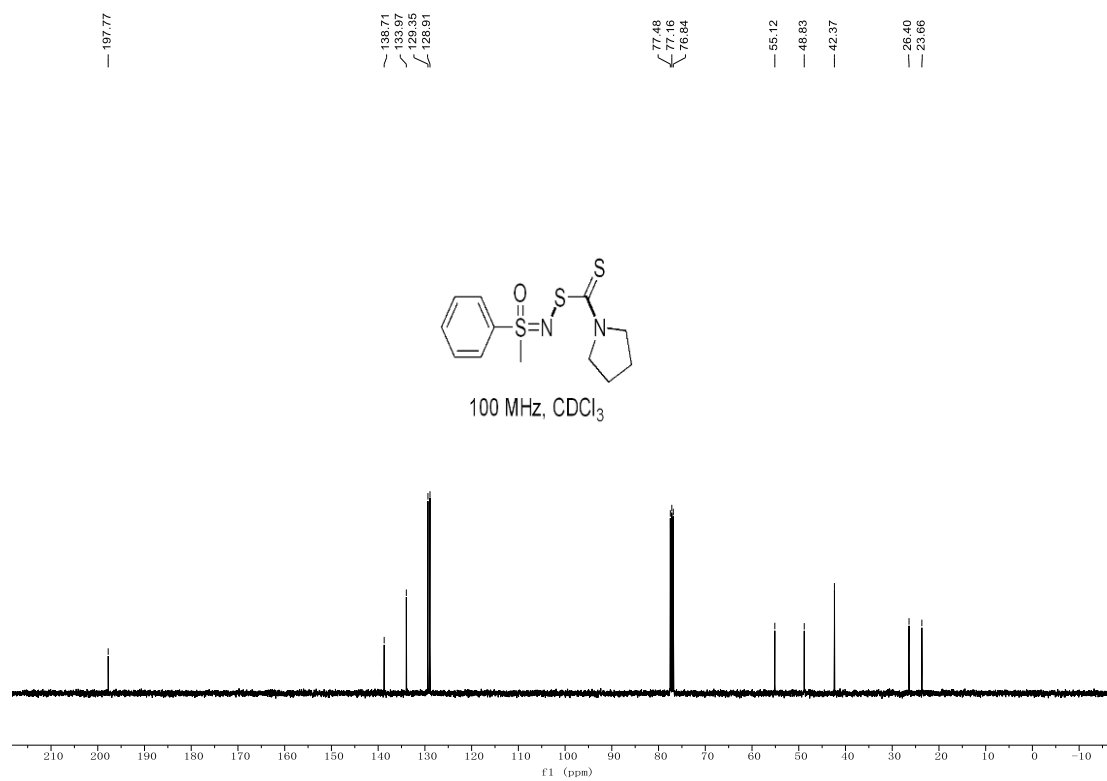

### 3ca-<sup>1</sup>H NMR

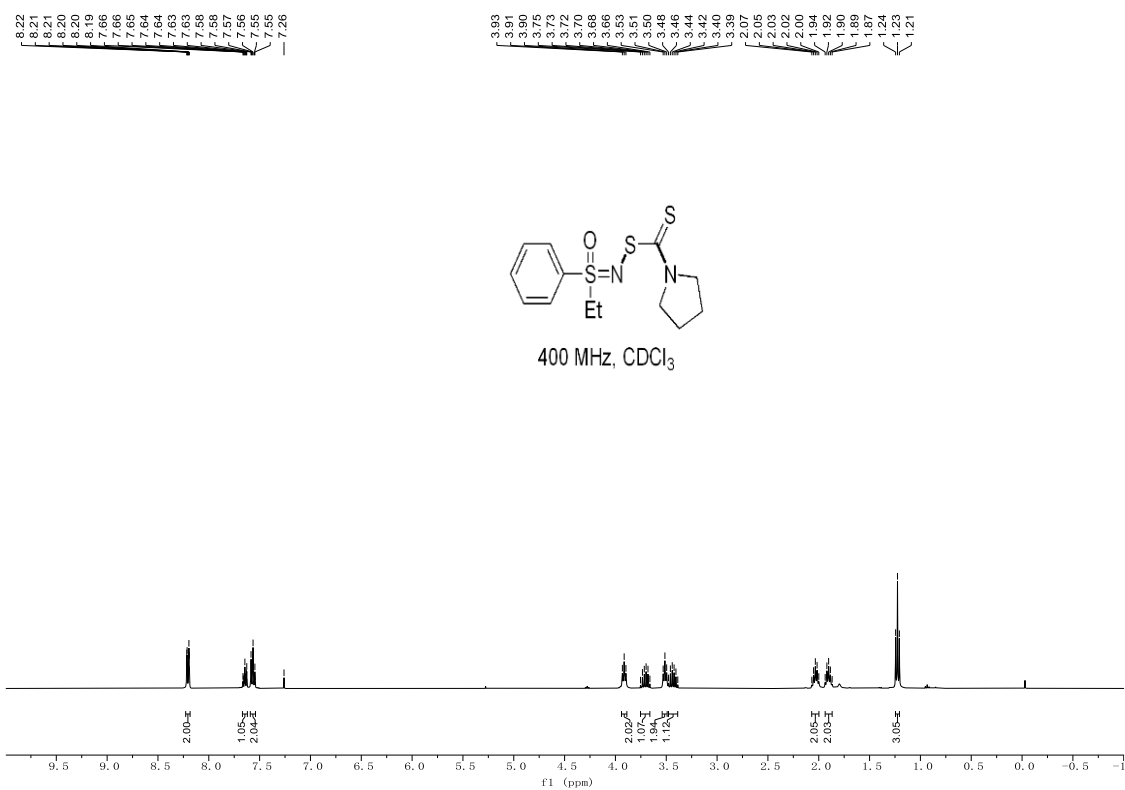

### 3ca-<sup>13</sup>C NMR

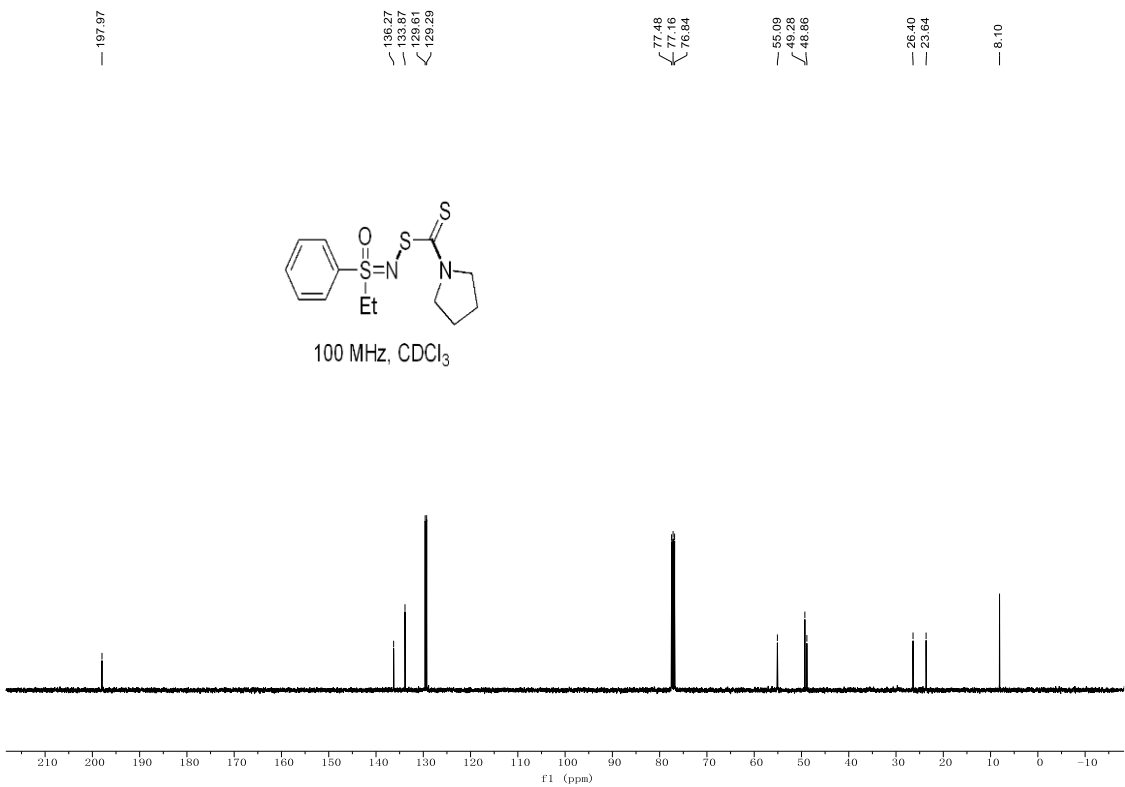



### 3da-<sup>1</sup>H NMR

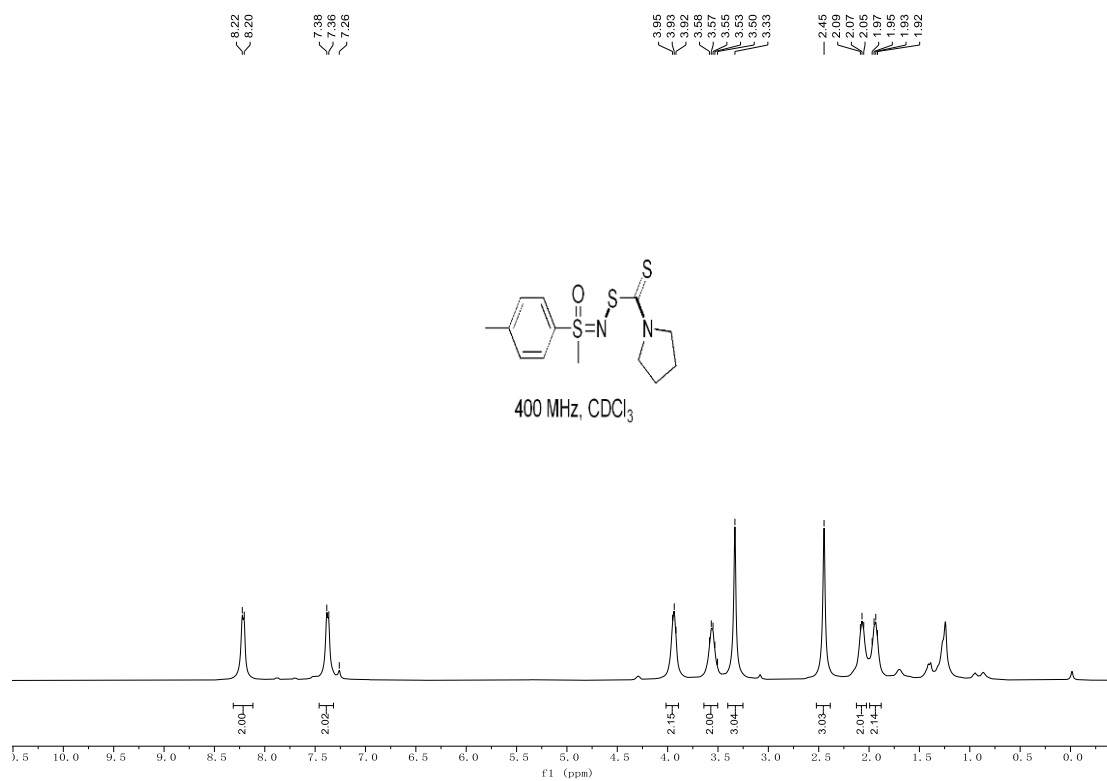

### 3da-<sup>13</sup>C NMR

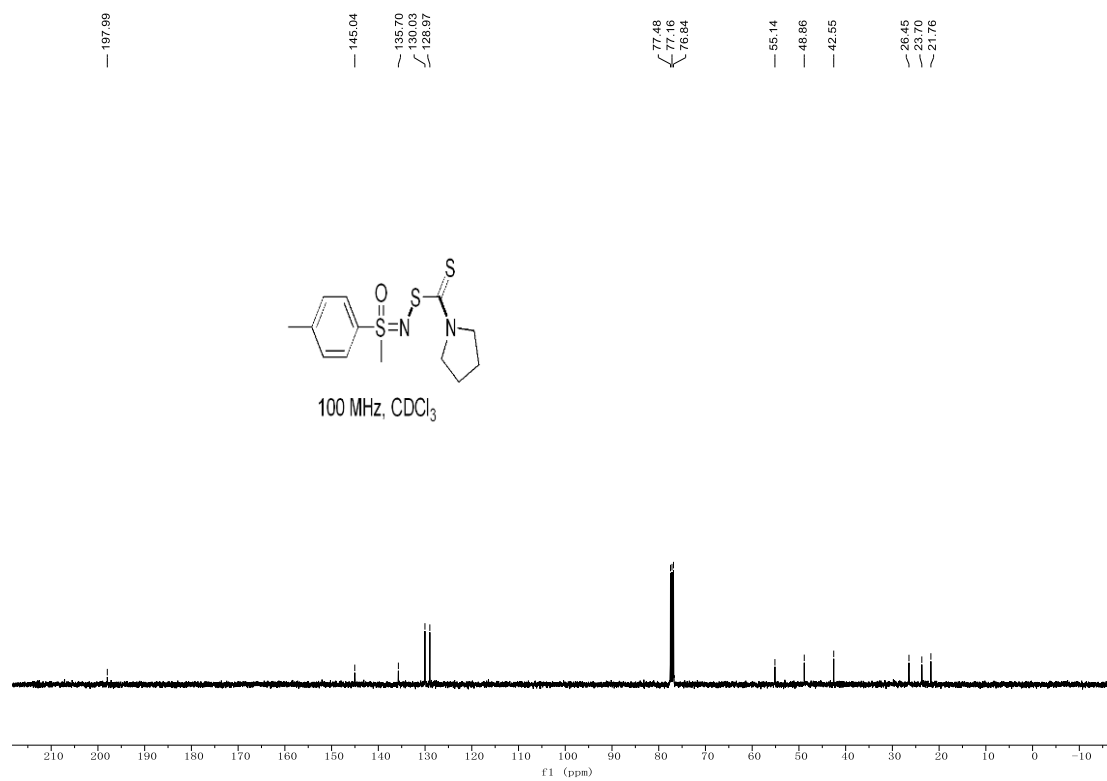

### 3ea-<sup>1</sup>H NMR

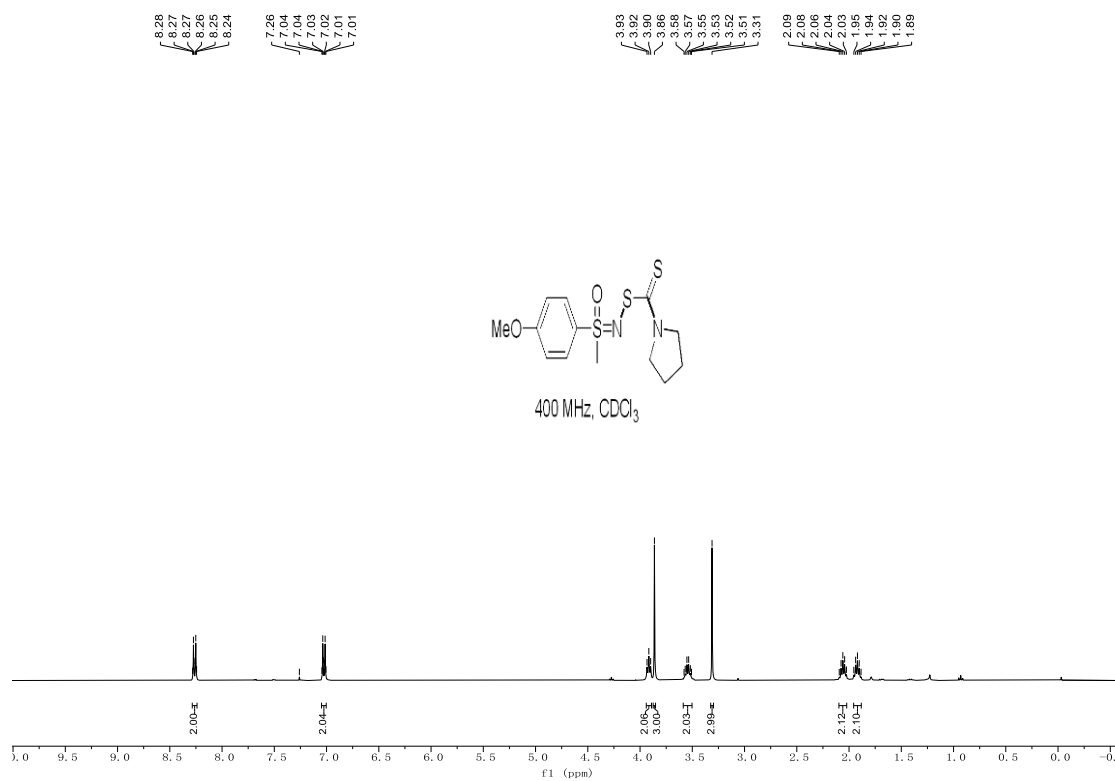

### 3ea -<sup>13</sup>C NMR

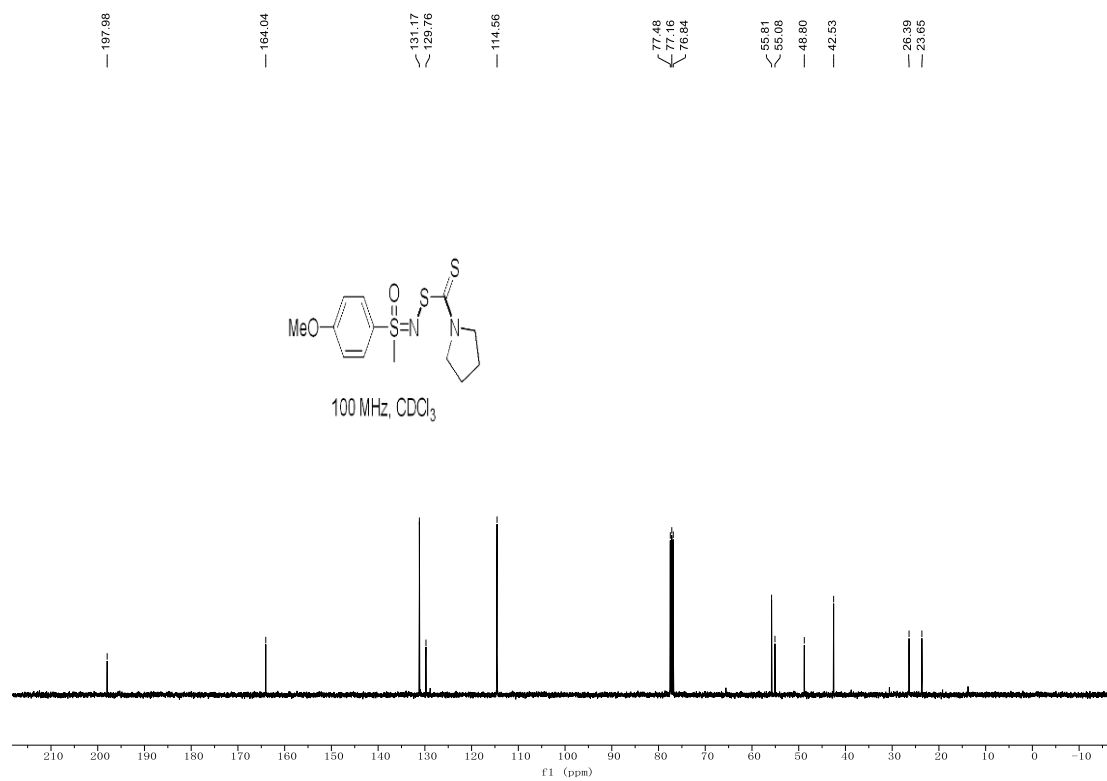

### 3fa-<sup>1</sup>H NMR

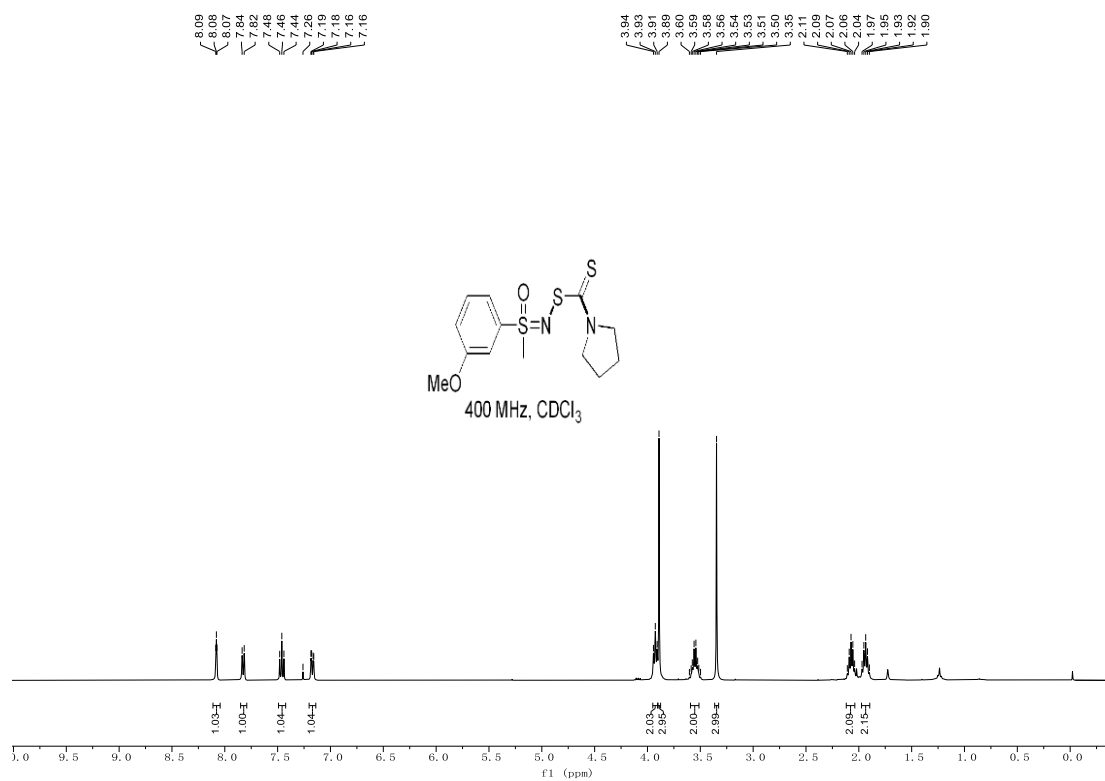

### 3fa-<sup>13</sup>C NMR

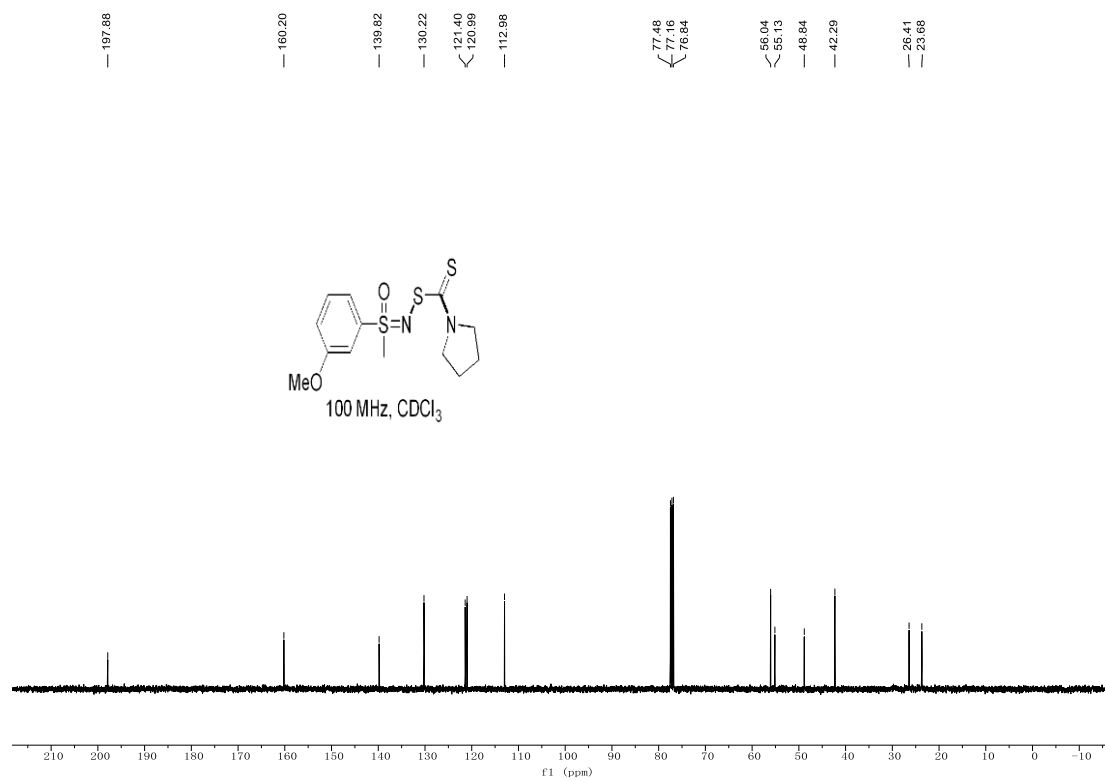

### 3ga-<sup>1</sup>H NMR

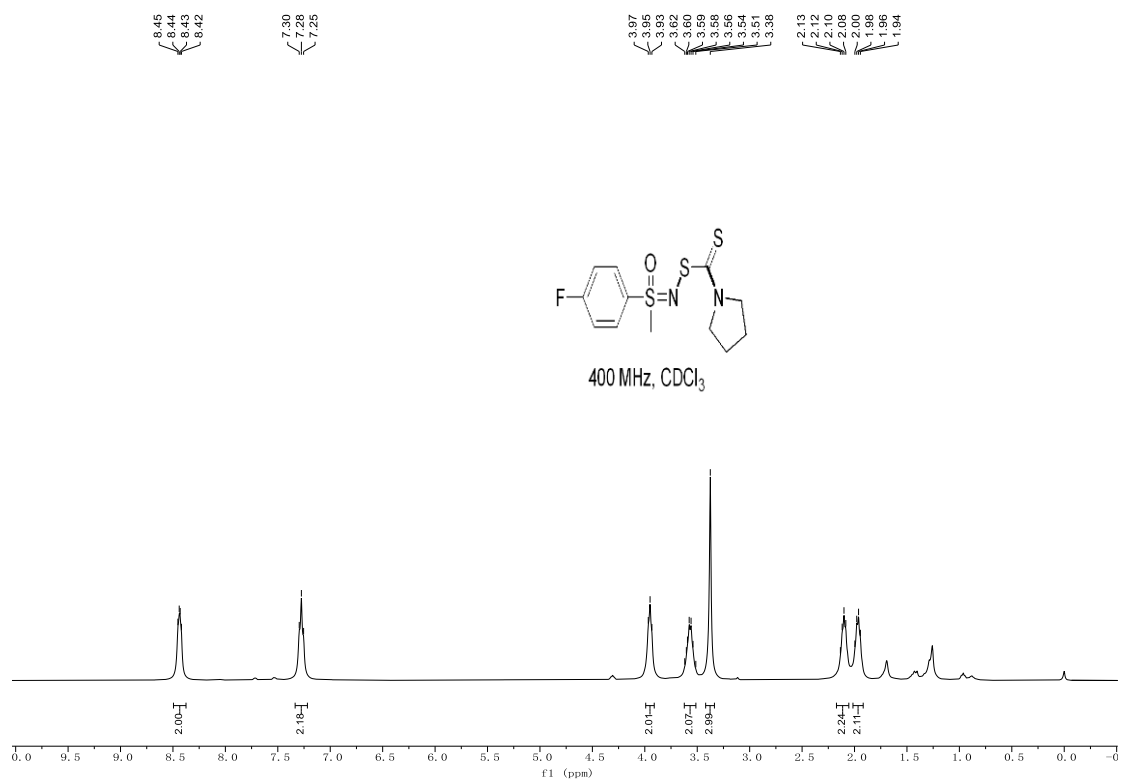

### 3ga-<sup>13</sup>C NMR

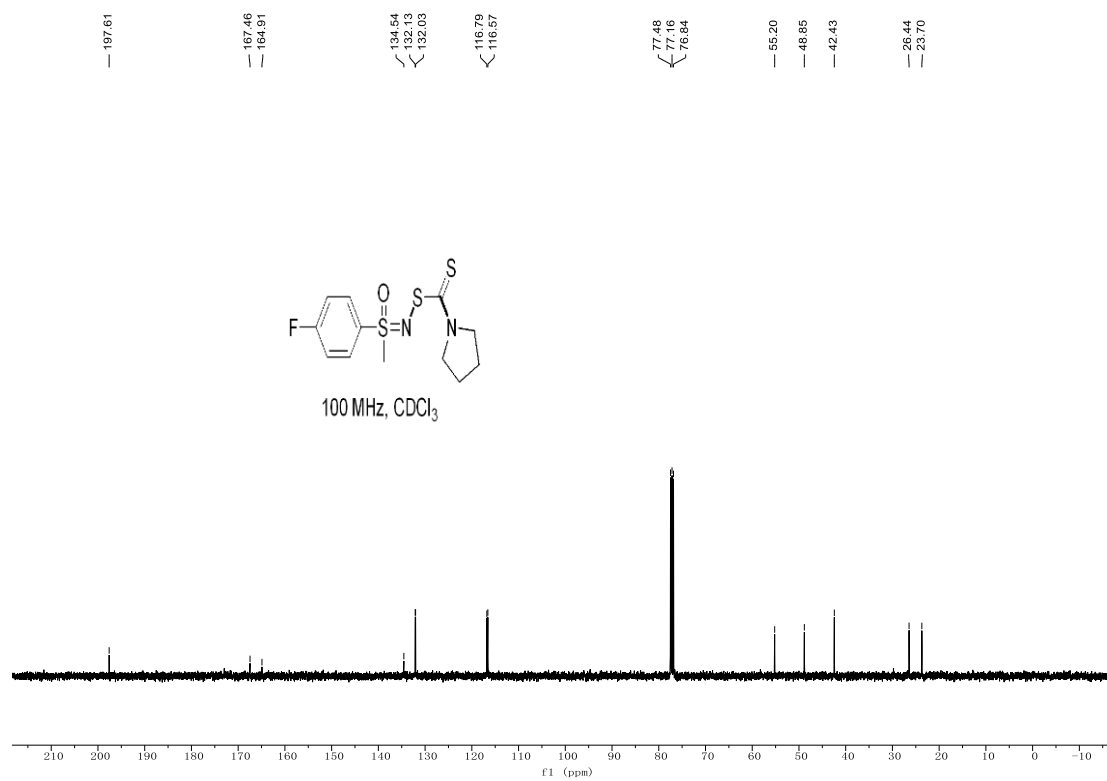

### 3ga -<sup>19</sup>F NMR

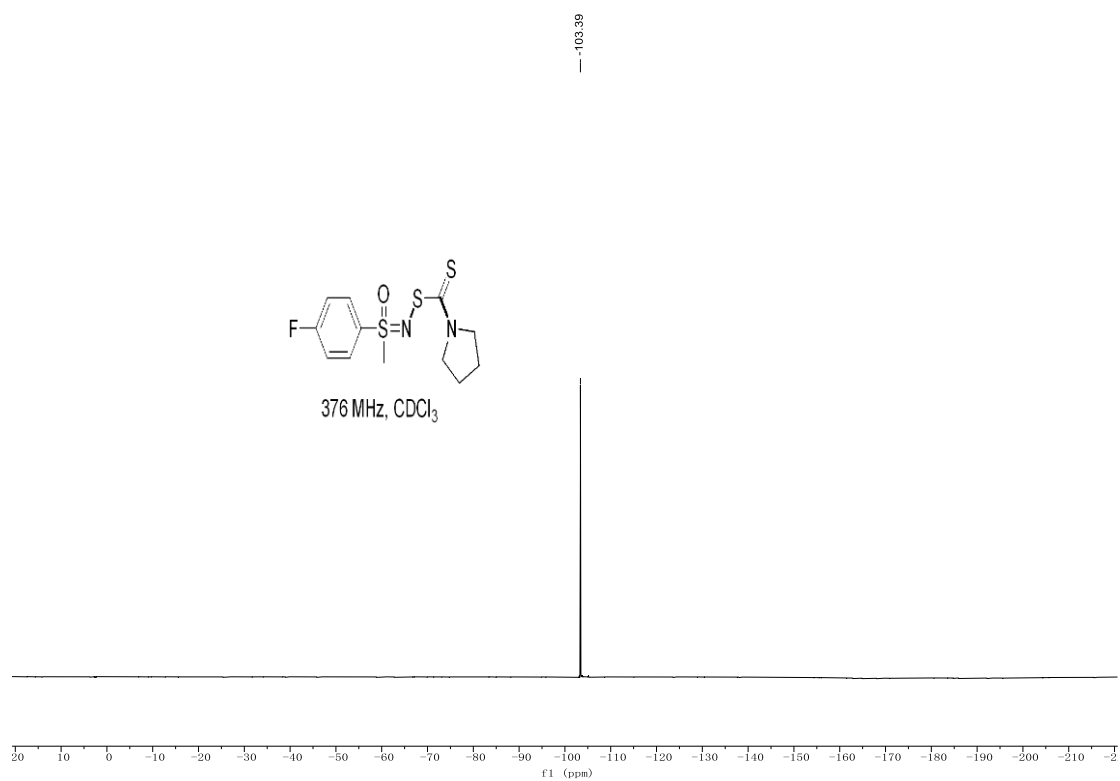

### 3ha-<sup>1</sup>H NMR

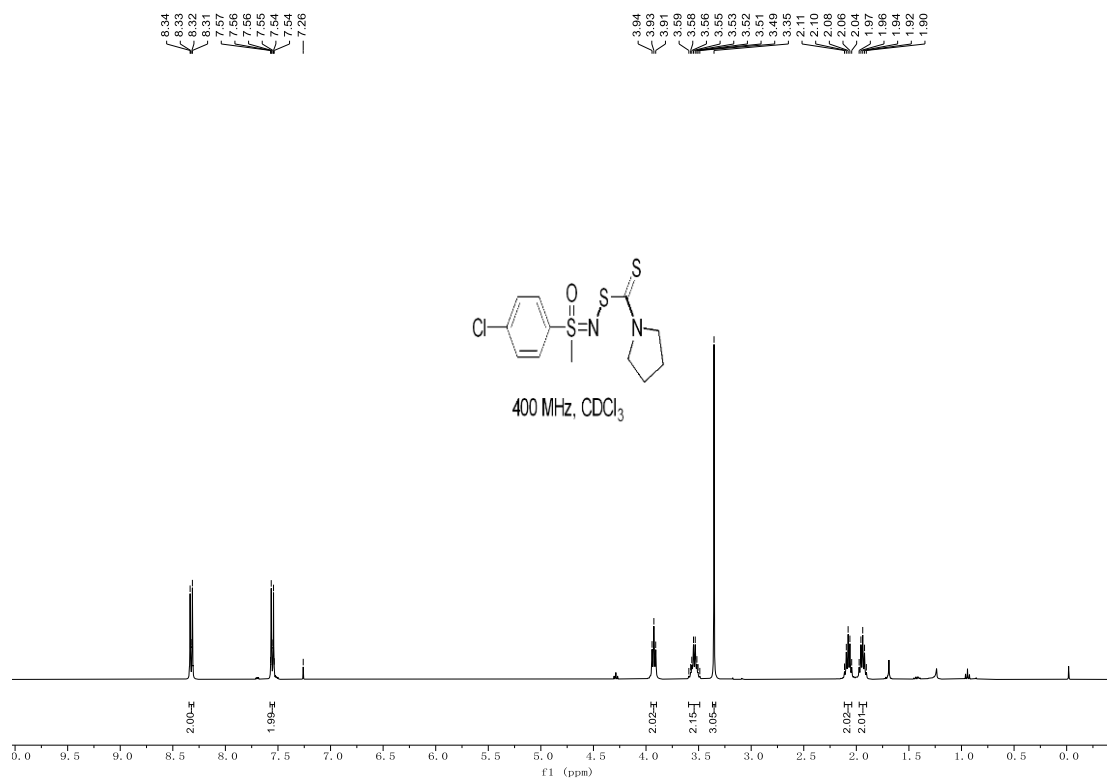

### 3ha -<sup>13</sup>C NMR

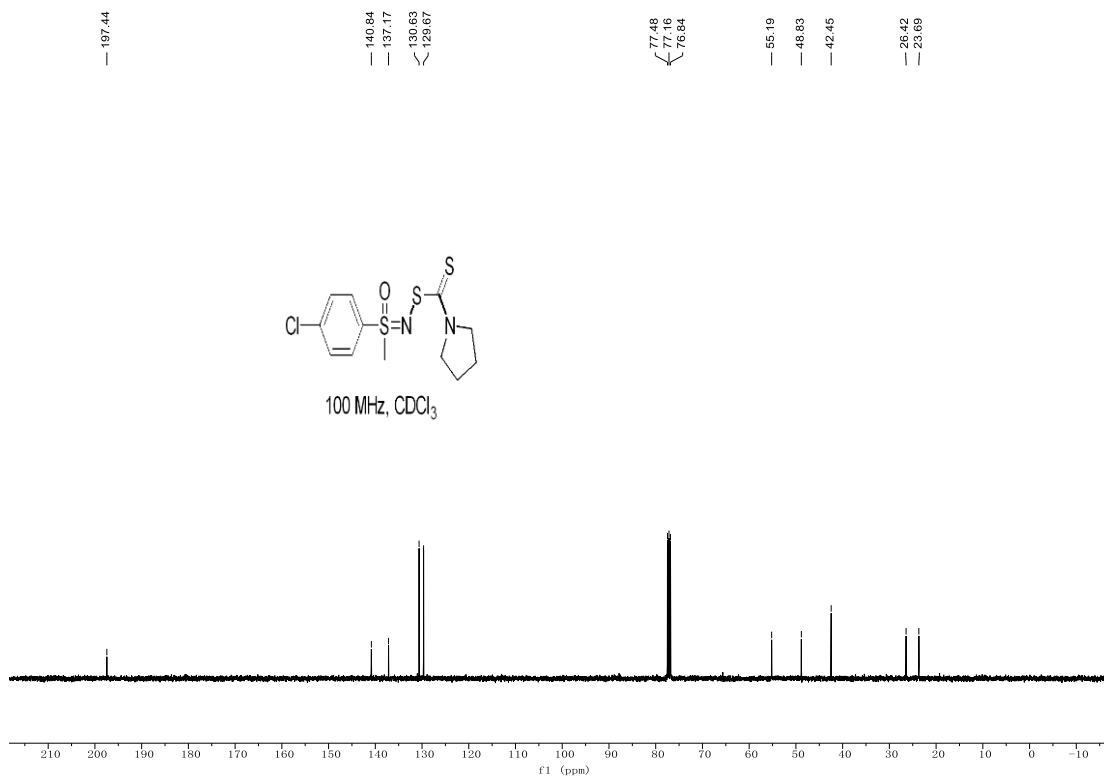

### 3ia-<sup>1</sup>H NMR

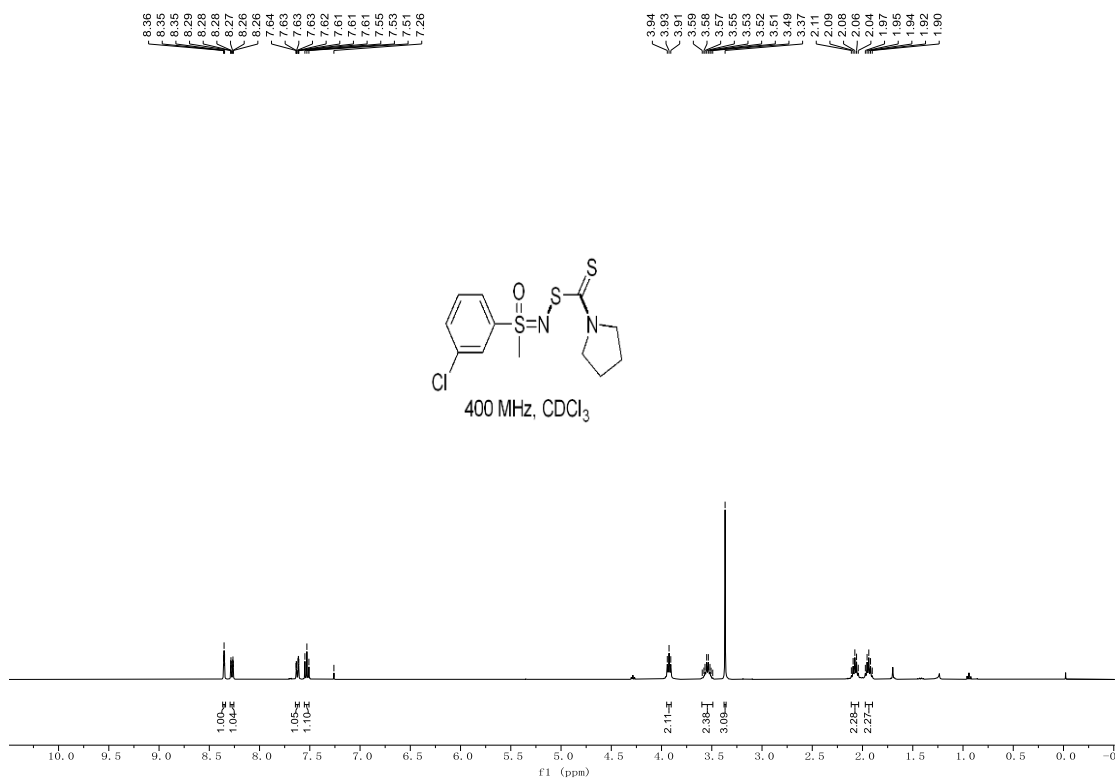

### 3ia -<sup>13</sup>C NMR

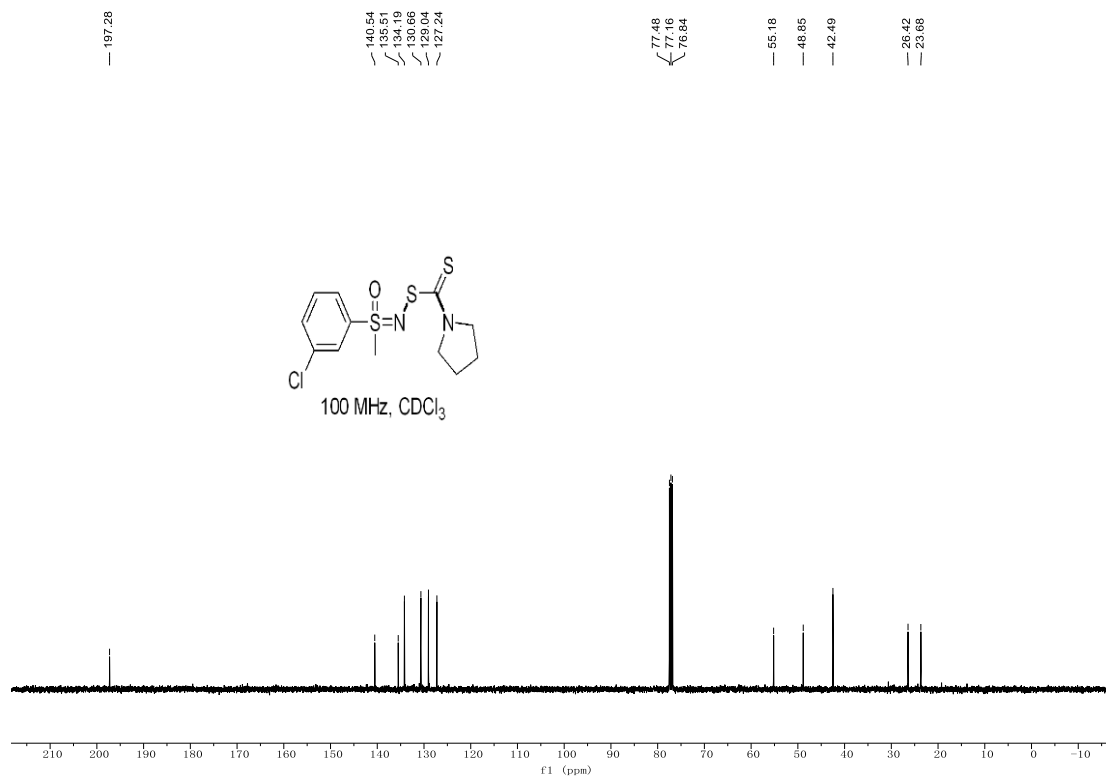

### 3ja-<sup>1</sup>H NMR

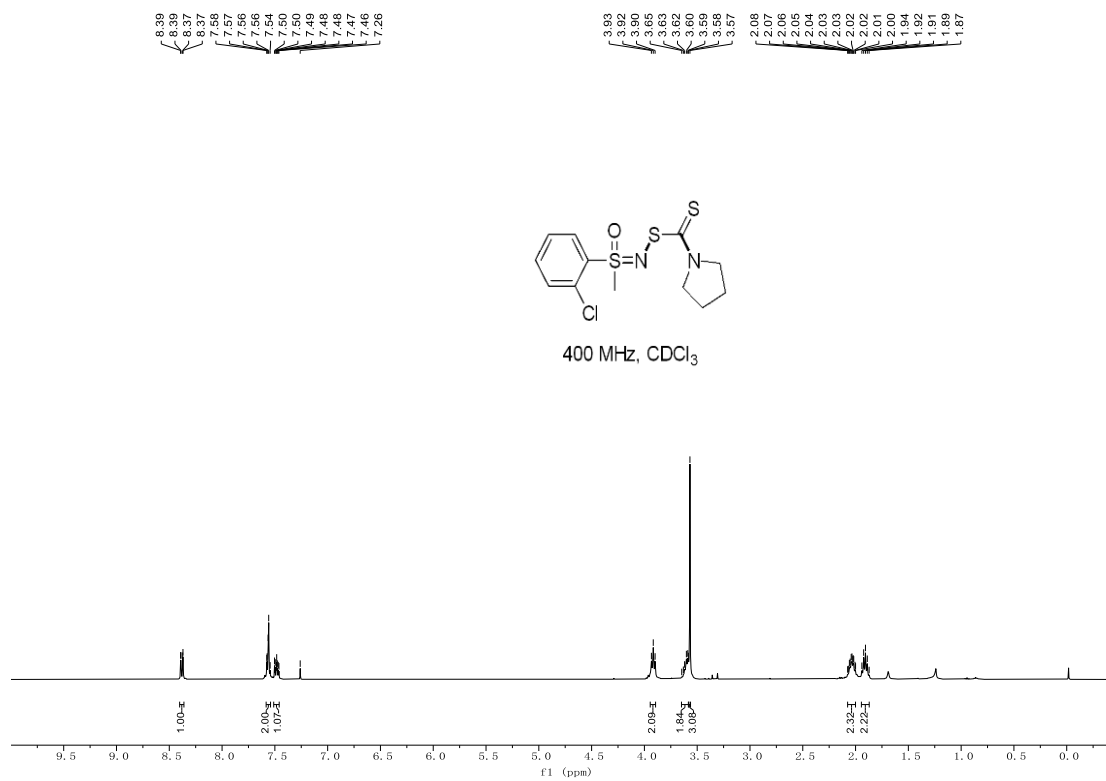

### 3ja-<sup>13</sup>C NMR

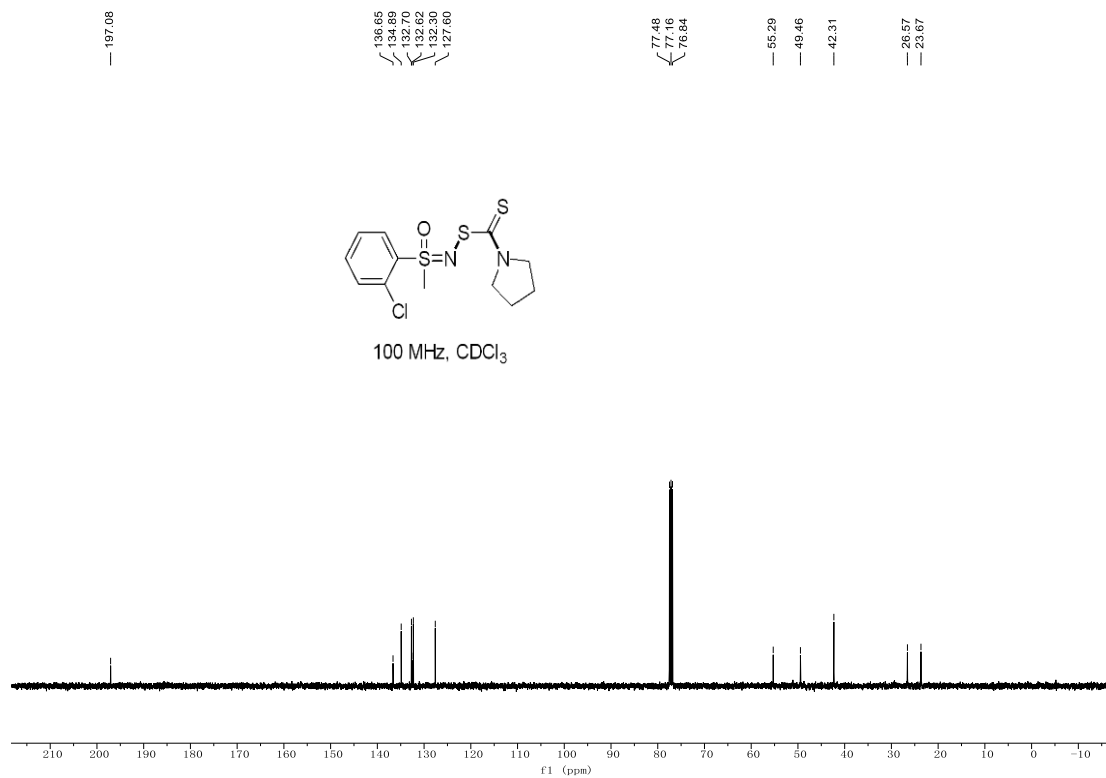

### 3ka-<sup>1</sup>H NMR

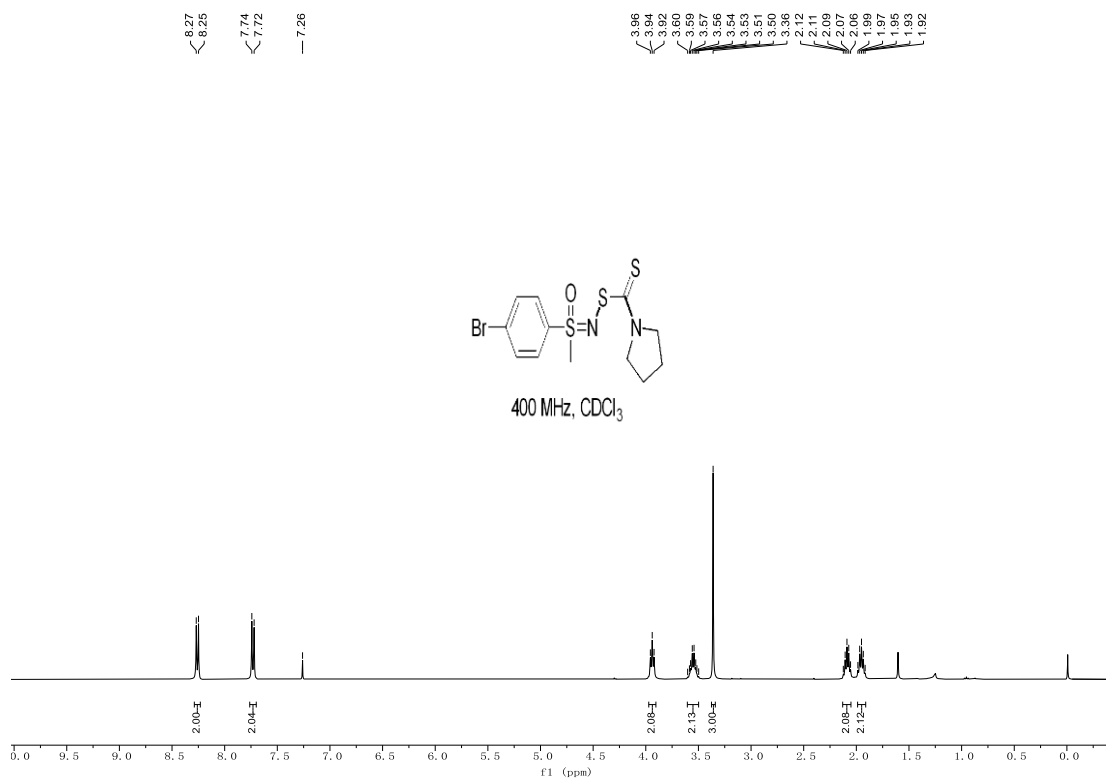



### 3ka-<sup>13</sup>C NMR

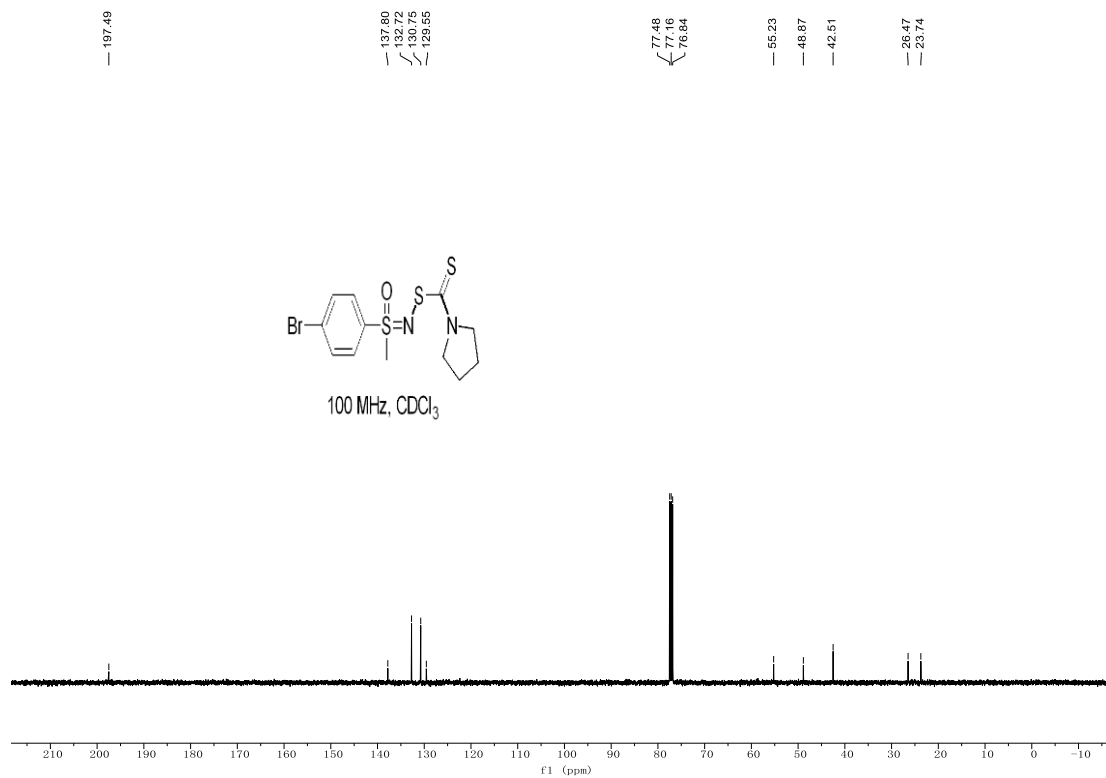

### 3la-<sup>1</sup>H NMR

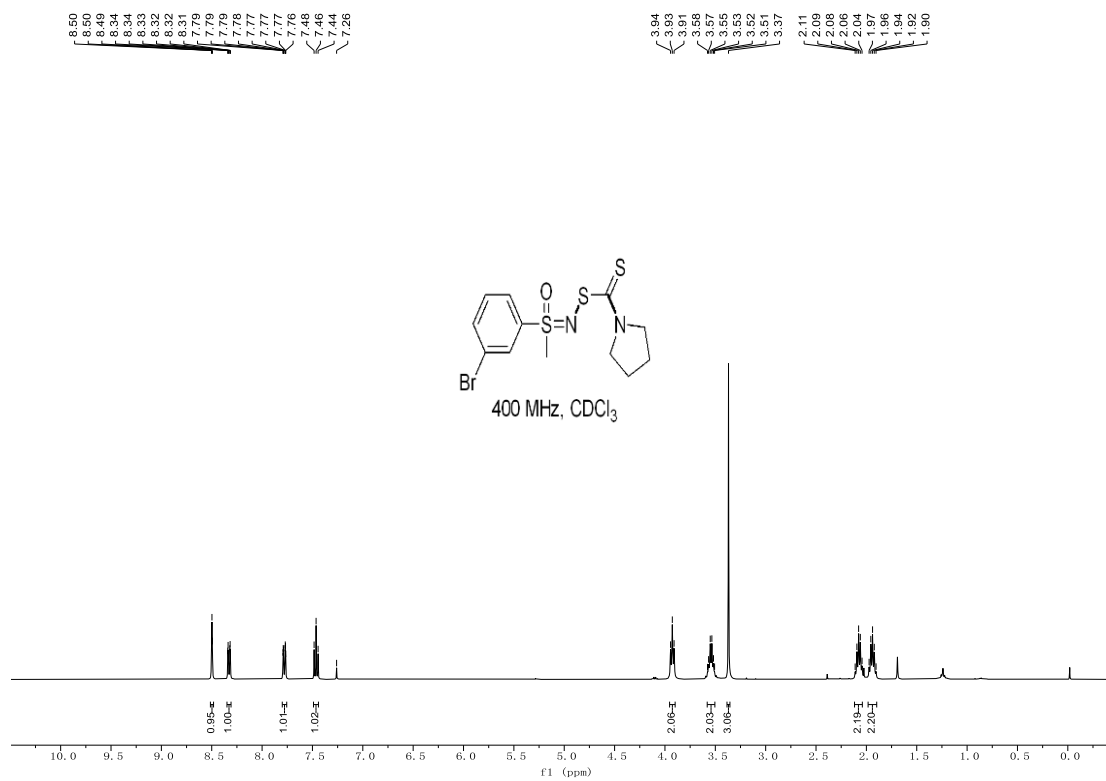

### 3la-<sup>13</sup>C NMR

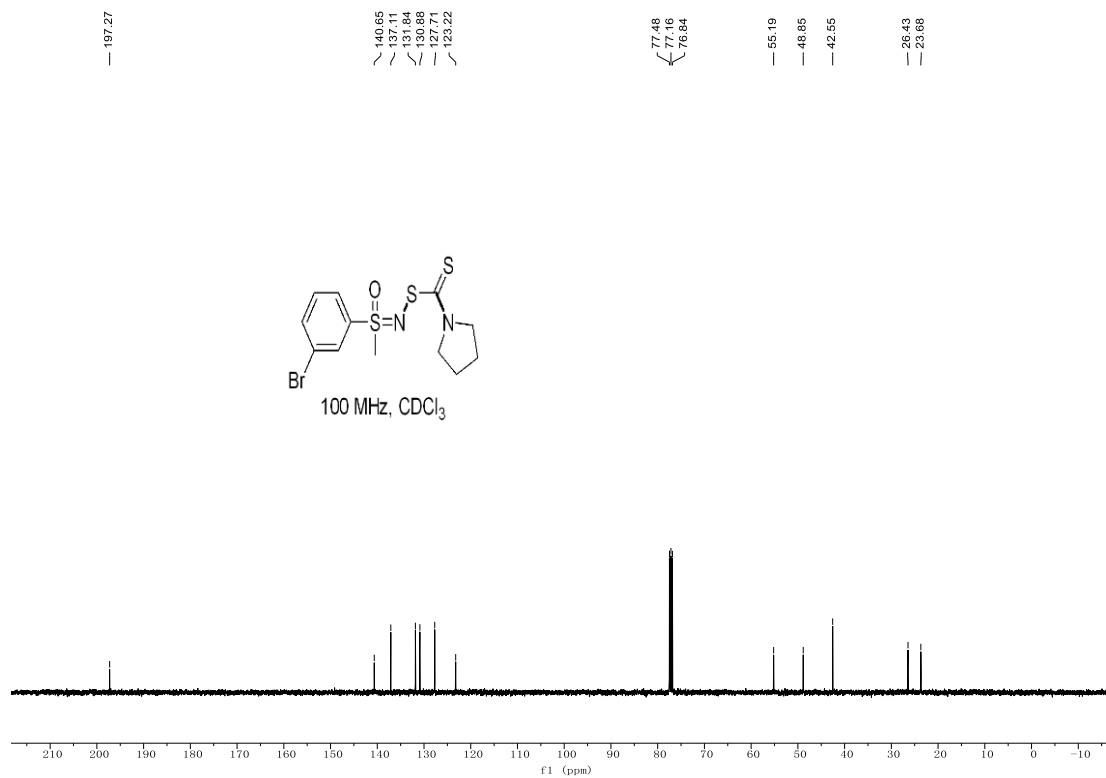

### 3ma-<sup>1</sup>H NMR

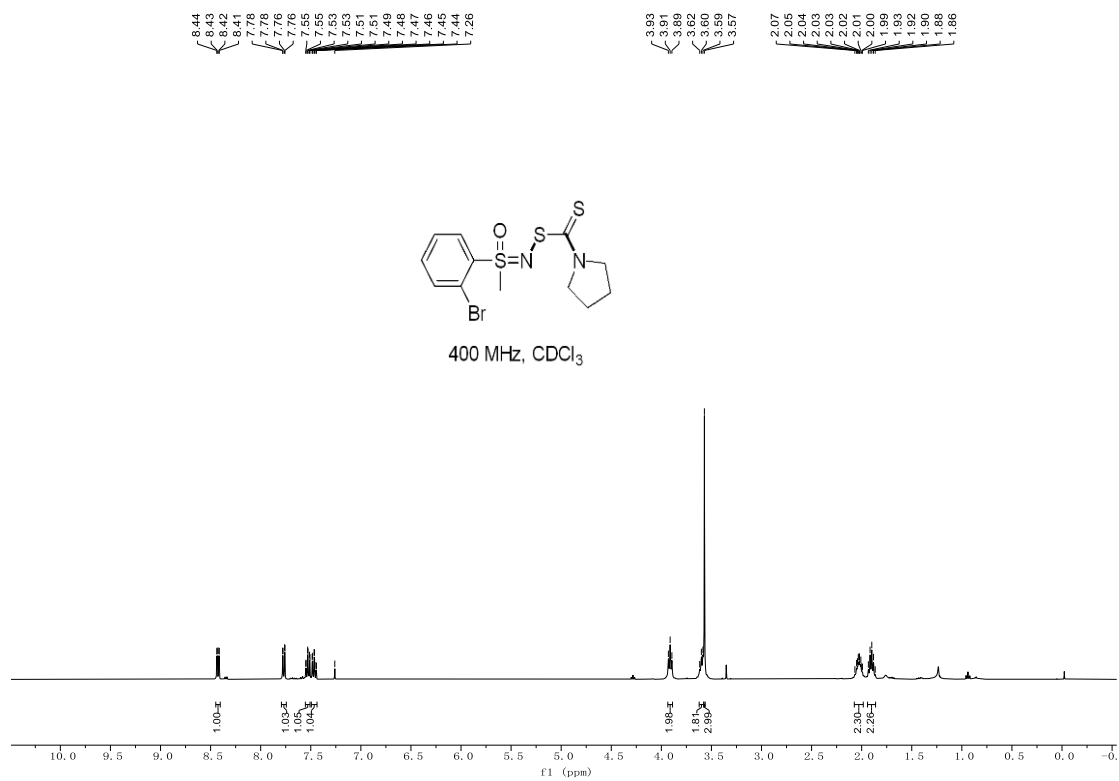

### 3ma -<sup>13</sup>C NMR

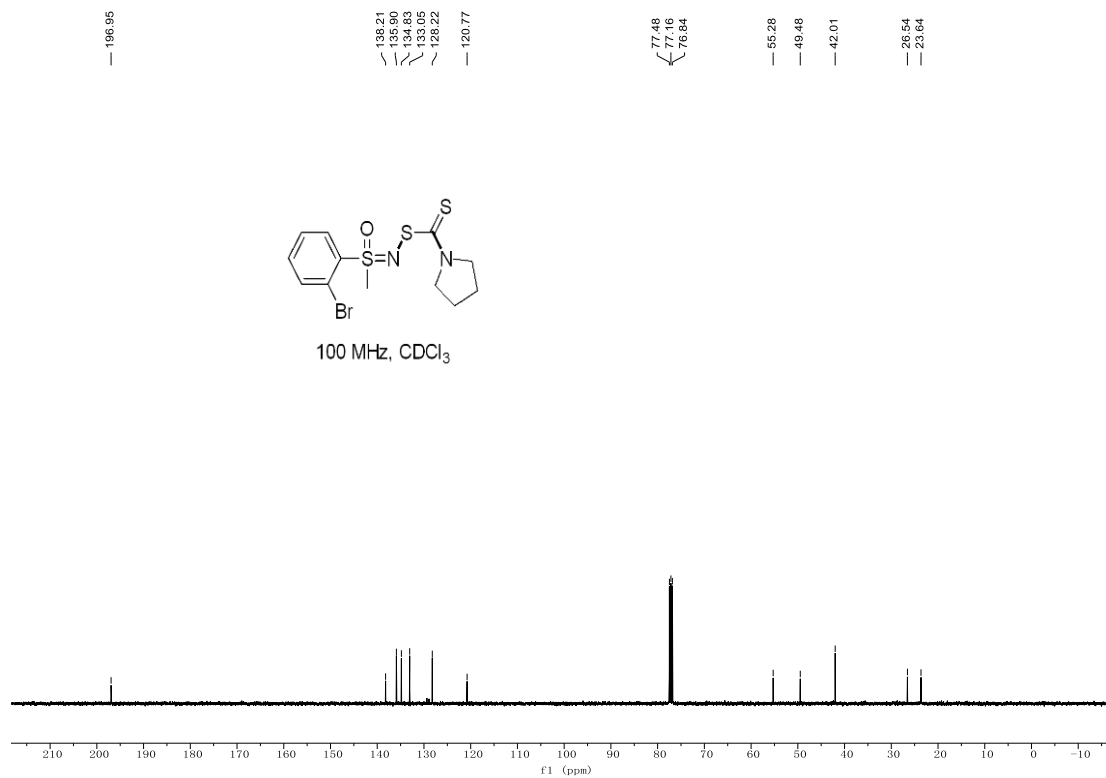

### 3na-<sup>1</sup>H NMR

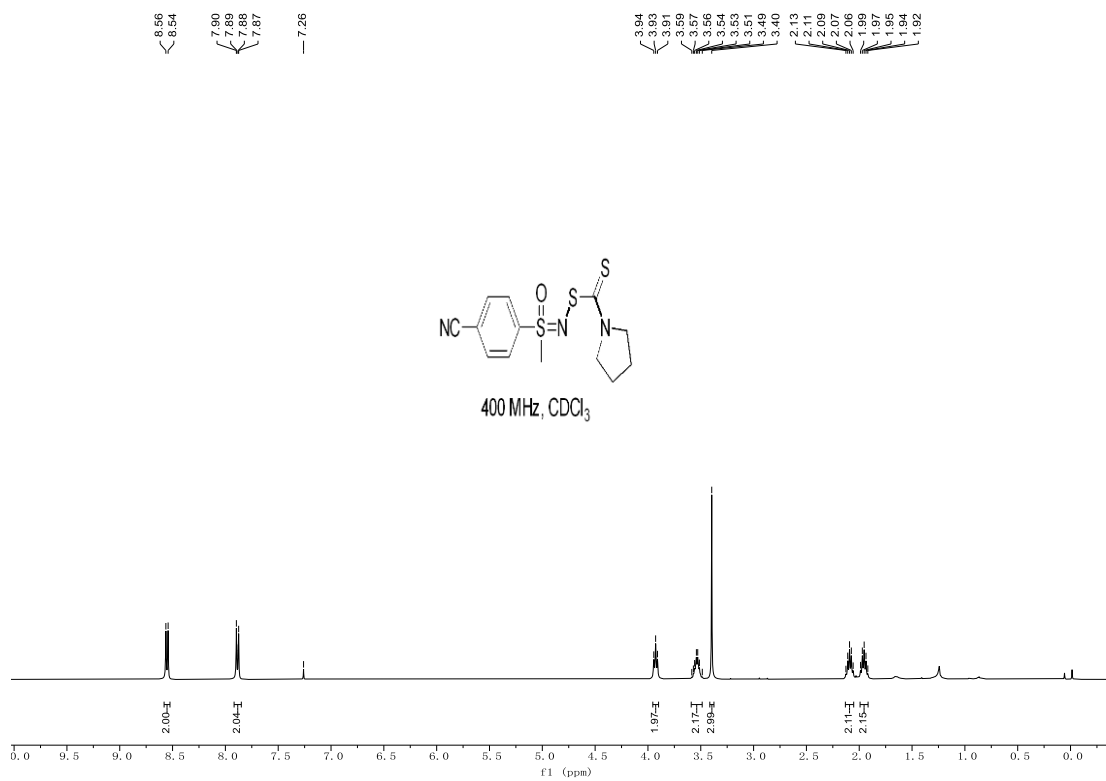

### 3na-<sup>13</sup>C NMR

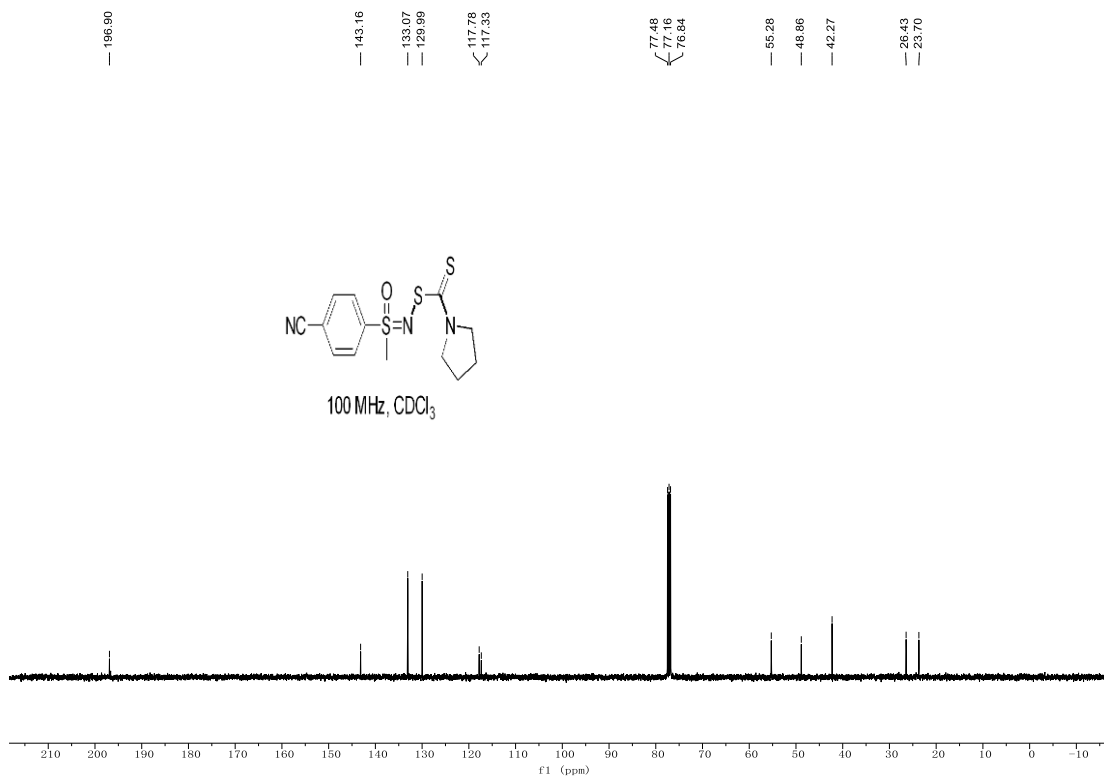

### 3oa-<sup>1</sup>H NMR

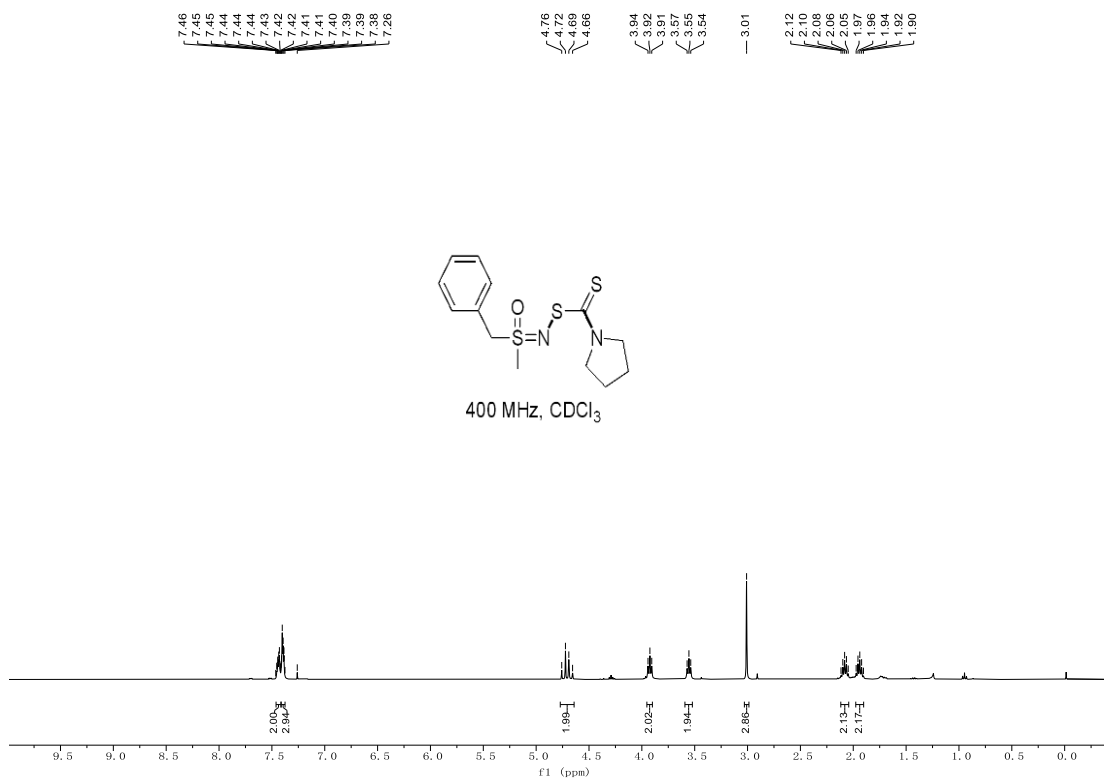

### 30a-<sup>13</sup>C NMR

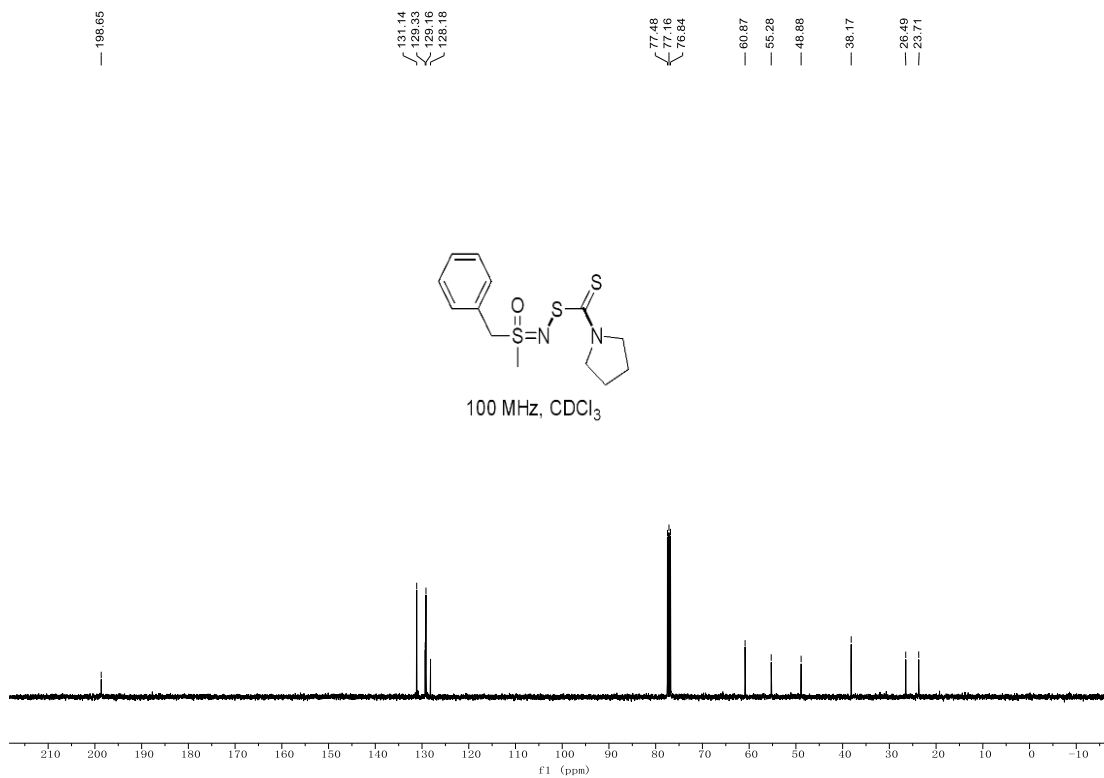

### 30b-<sup>1</sup>H NMR

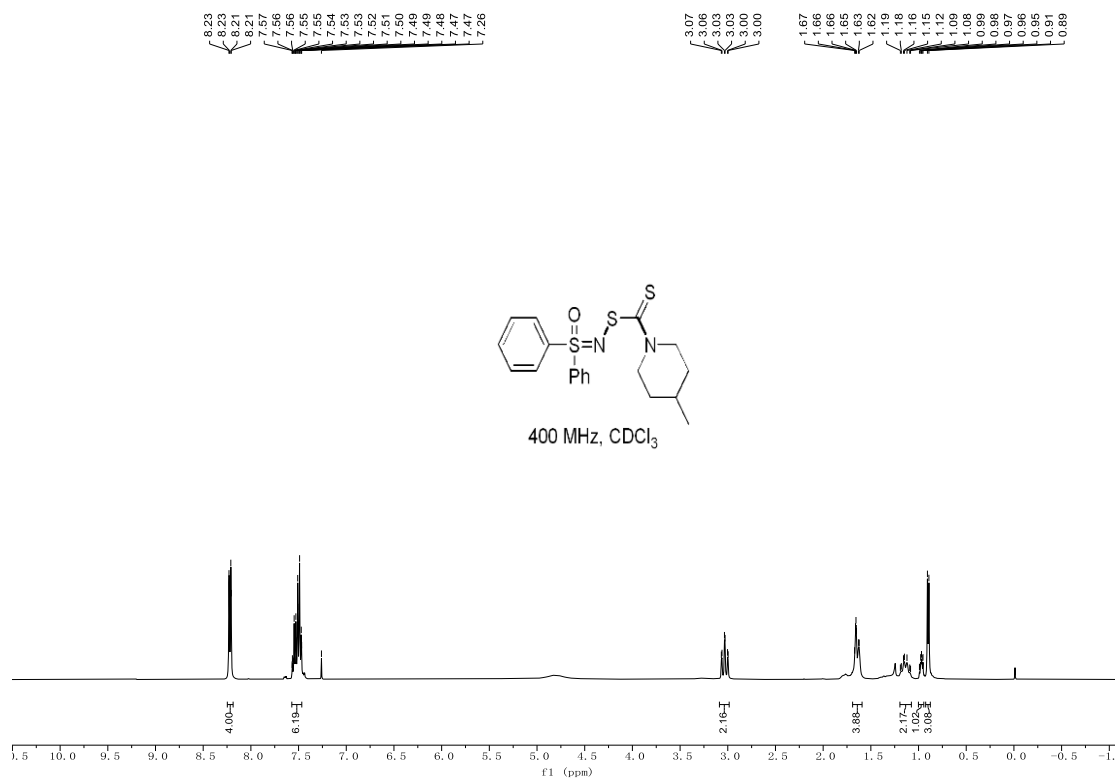

### 3ab-<sup>13</sup>C NMR

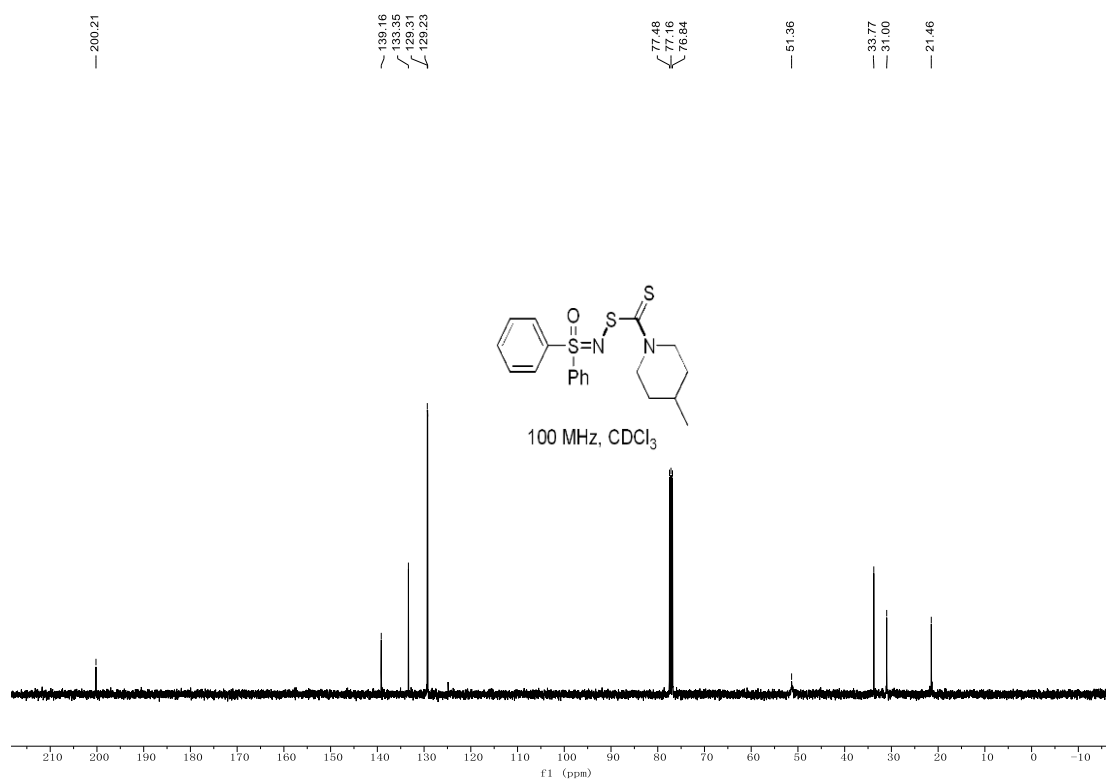

### 3ac-<sup>1</sup>H NMR

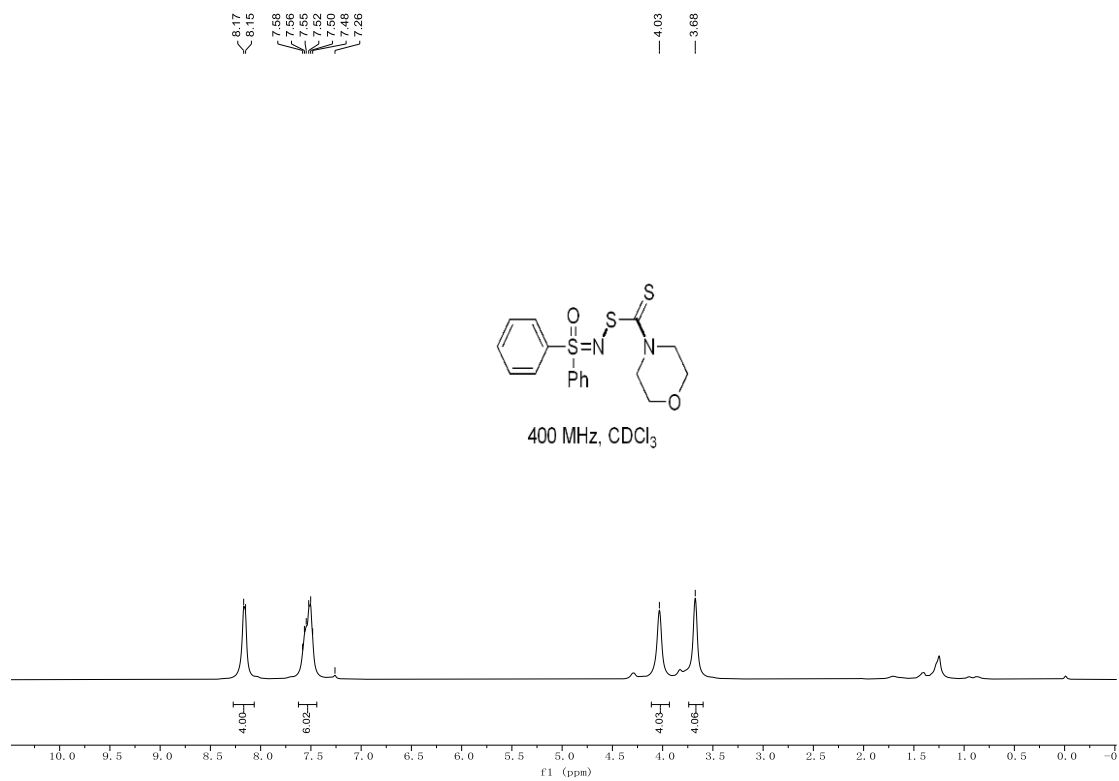

### 3ac-<sup>13</sup>C NMR

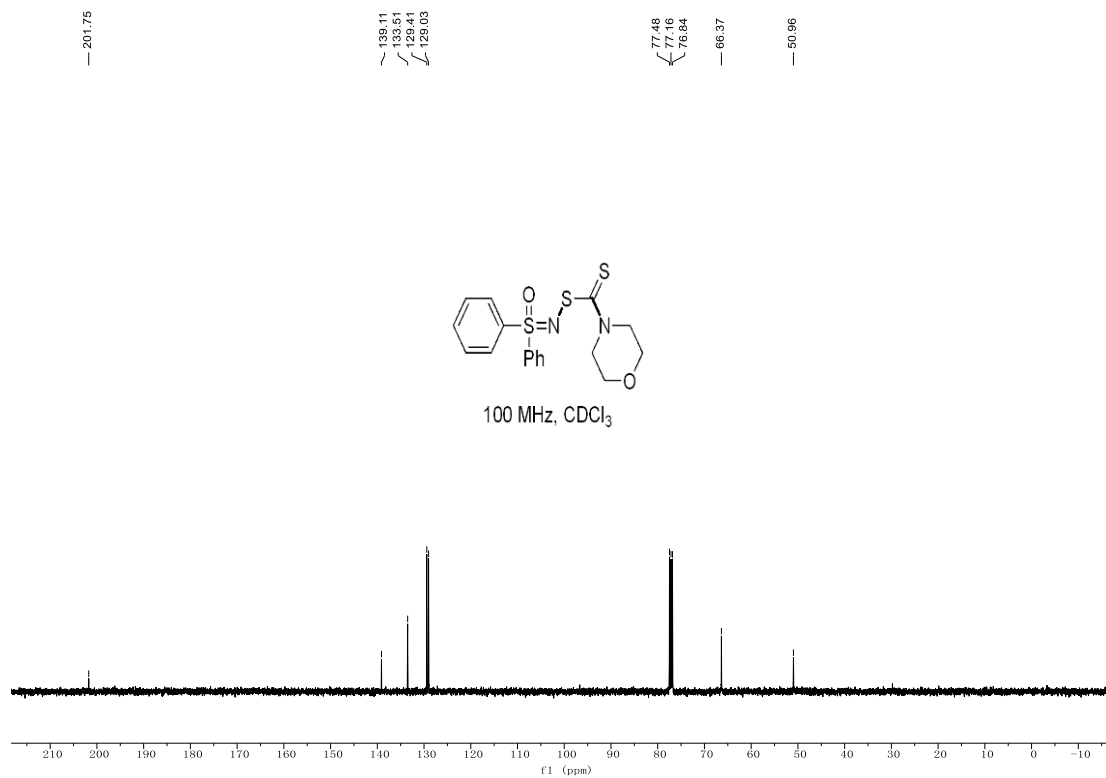

### 3ad-<sup>1</sup>H NMR

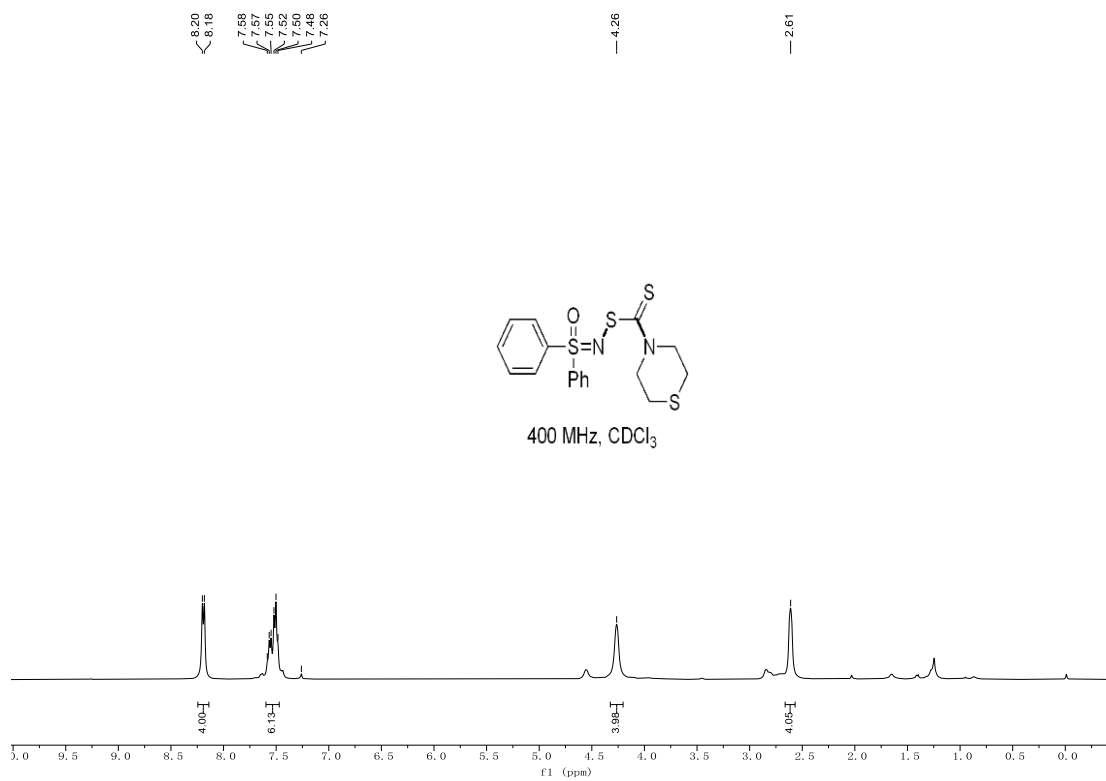

### 3ad-<sup>13</sup>C NMR

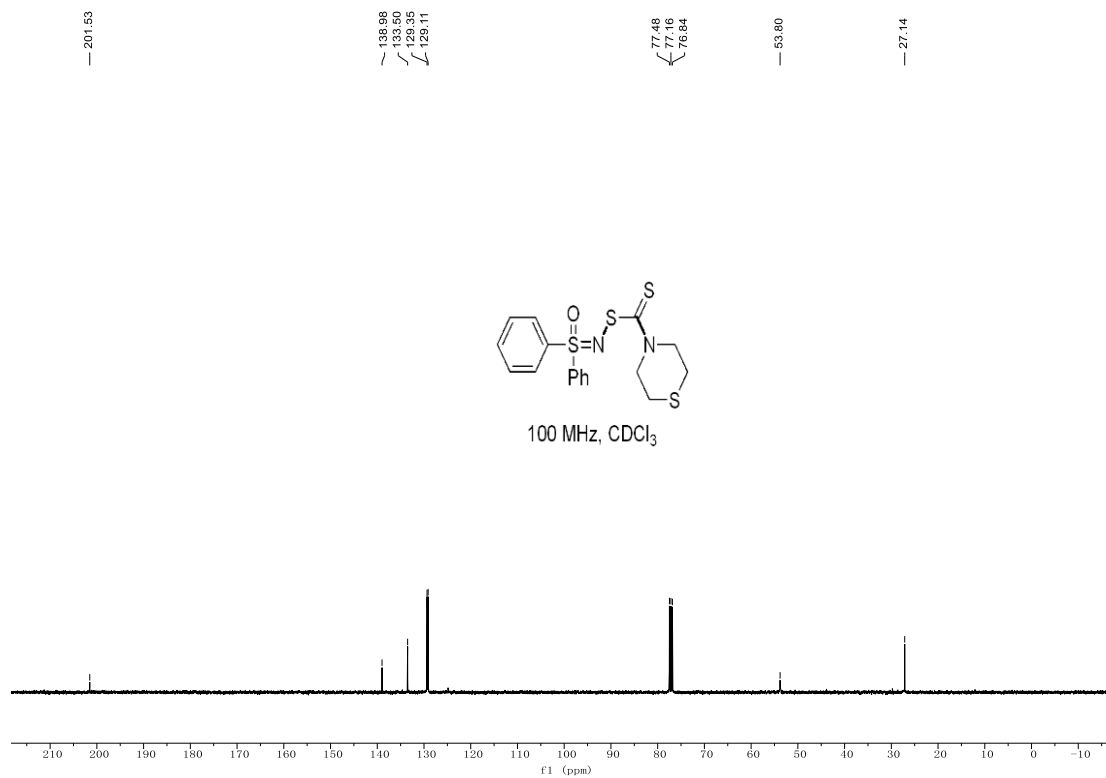

### 3ae-<sup>1</sup>H NMR

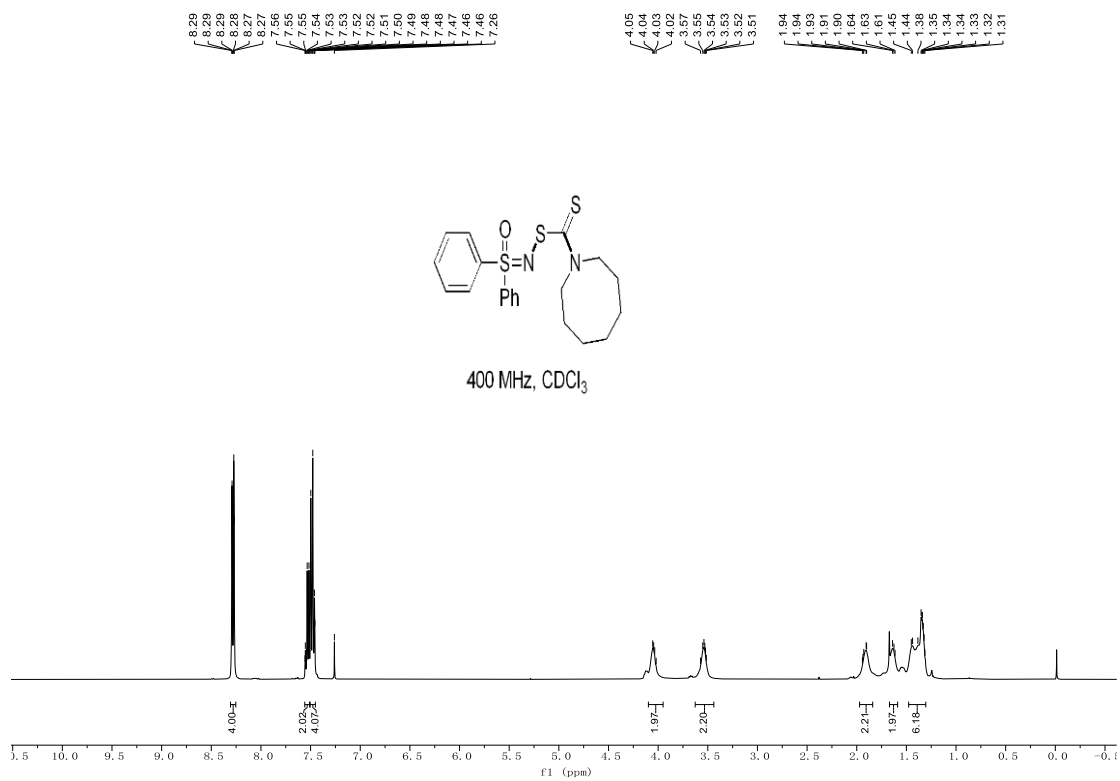



### 3ae-<sup>13</sup>C NMR

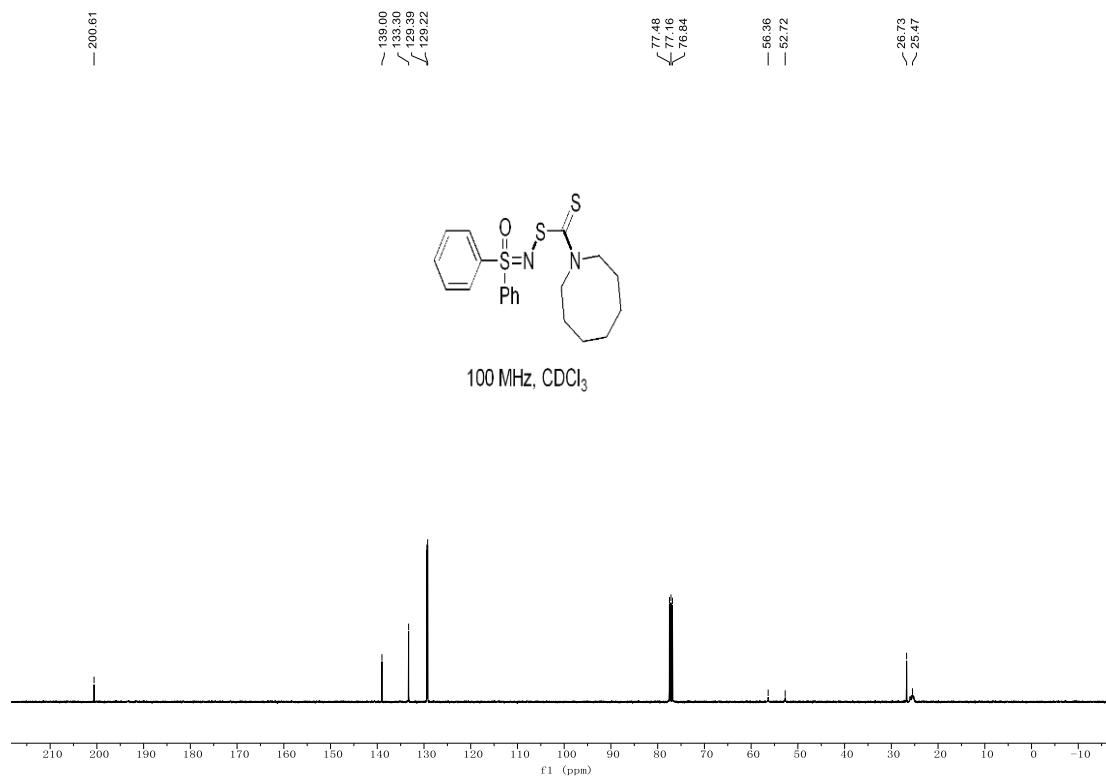

### 3af-<sup>1</sup>H NMR

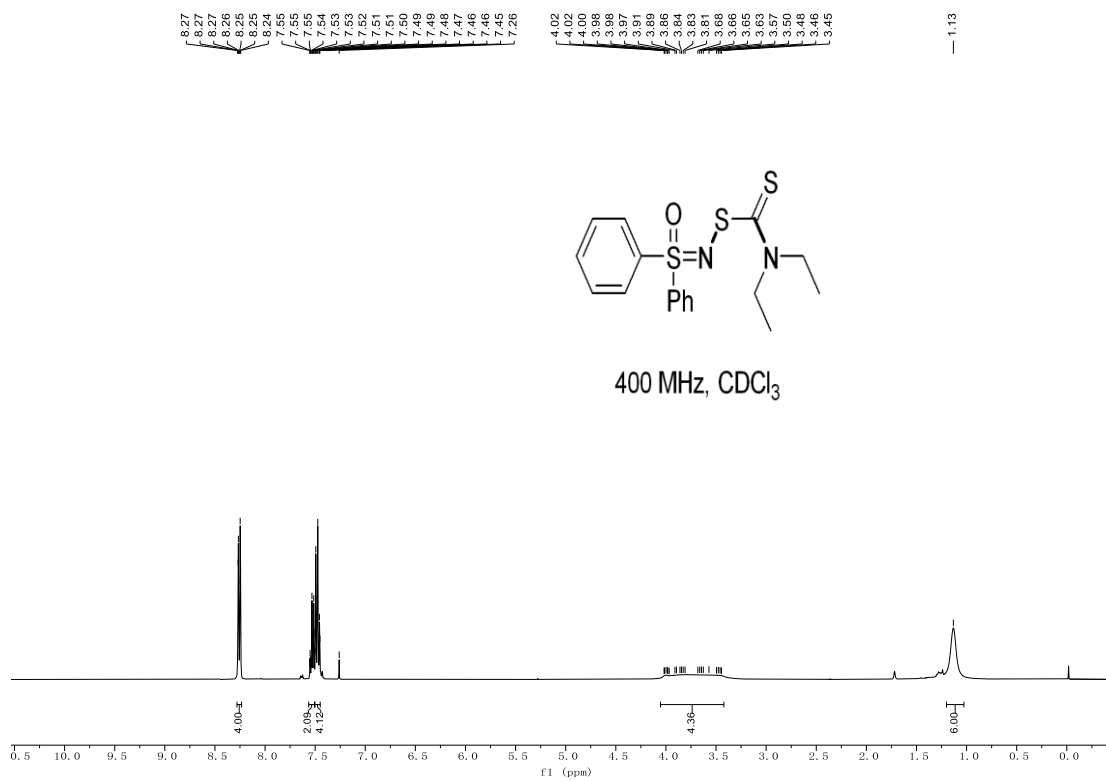

### 3af-<sup>13</sup>C NMR

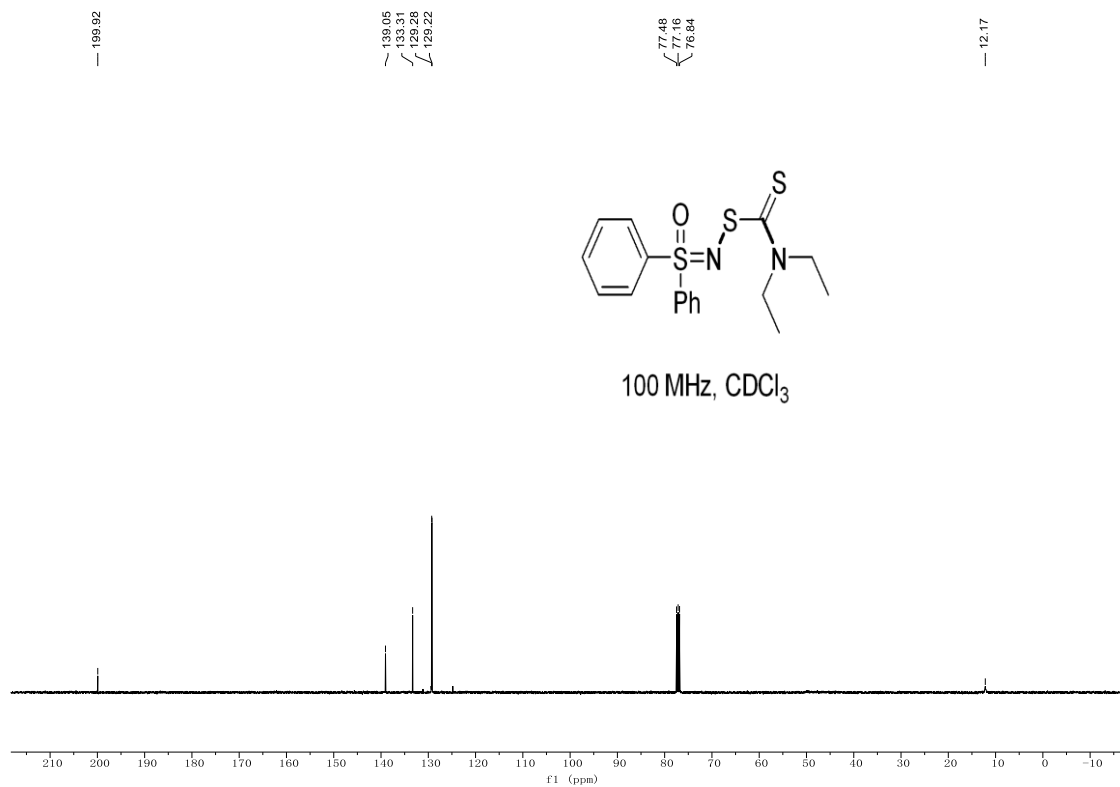

### 3ag-<sup>1</sup>H NMR

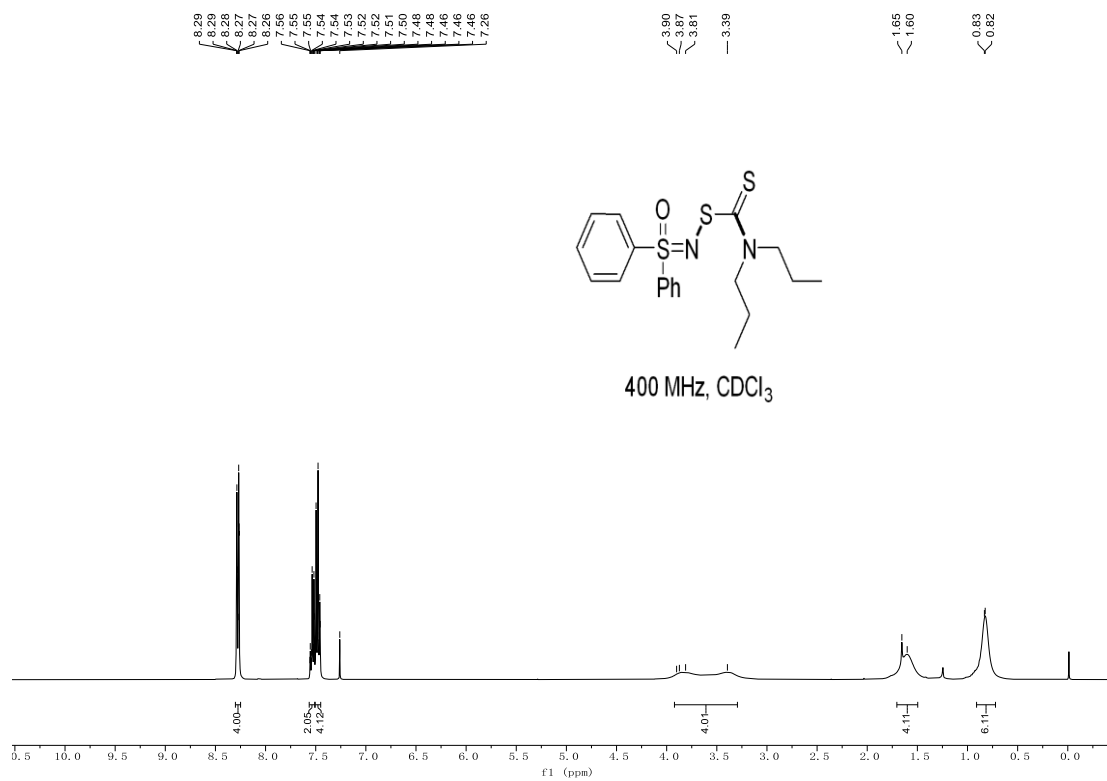

### 3ag-<sup>13</sup>C NMR

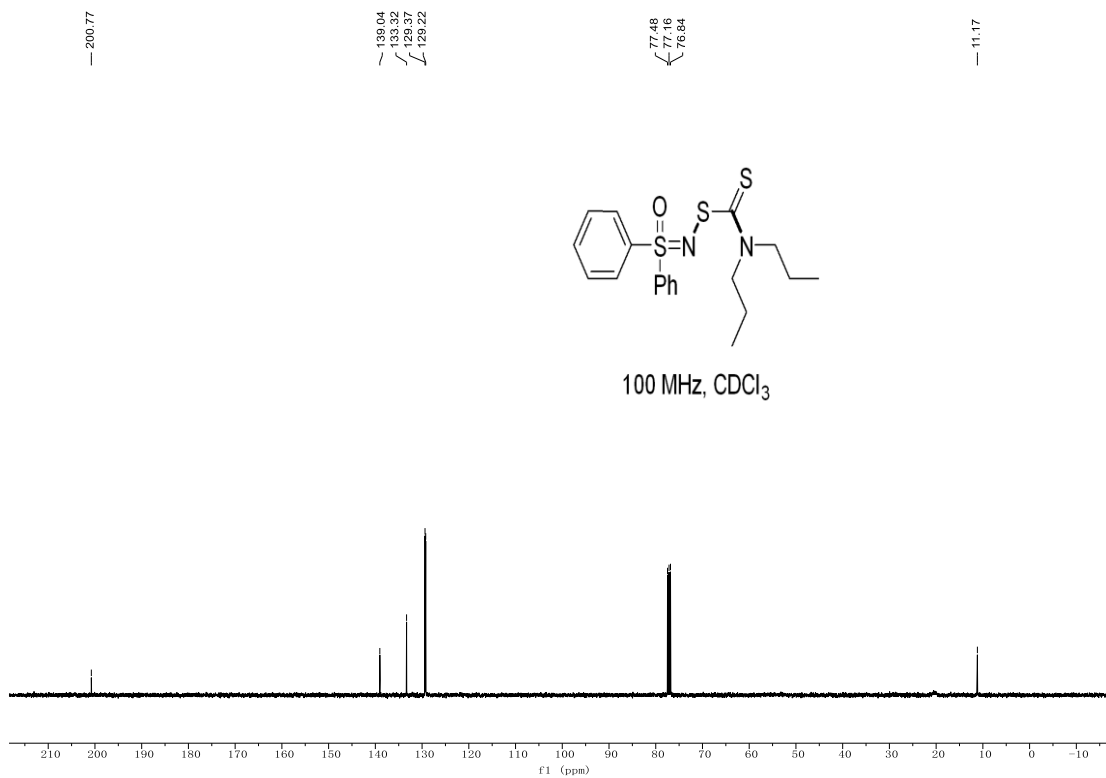

### 3ah-<sup>1</sup>H NMR

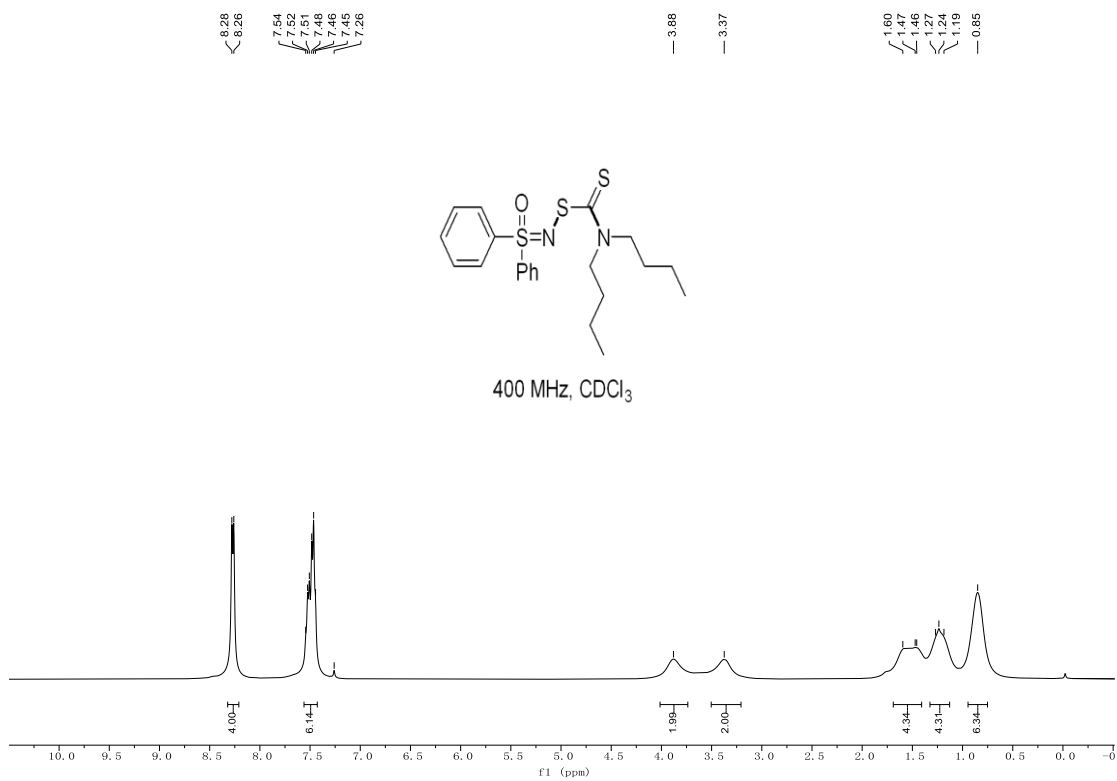

### 3ah-<sup>13</sup>C NMR

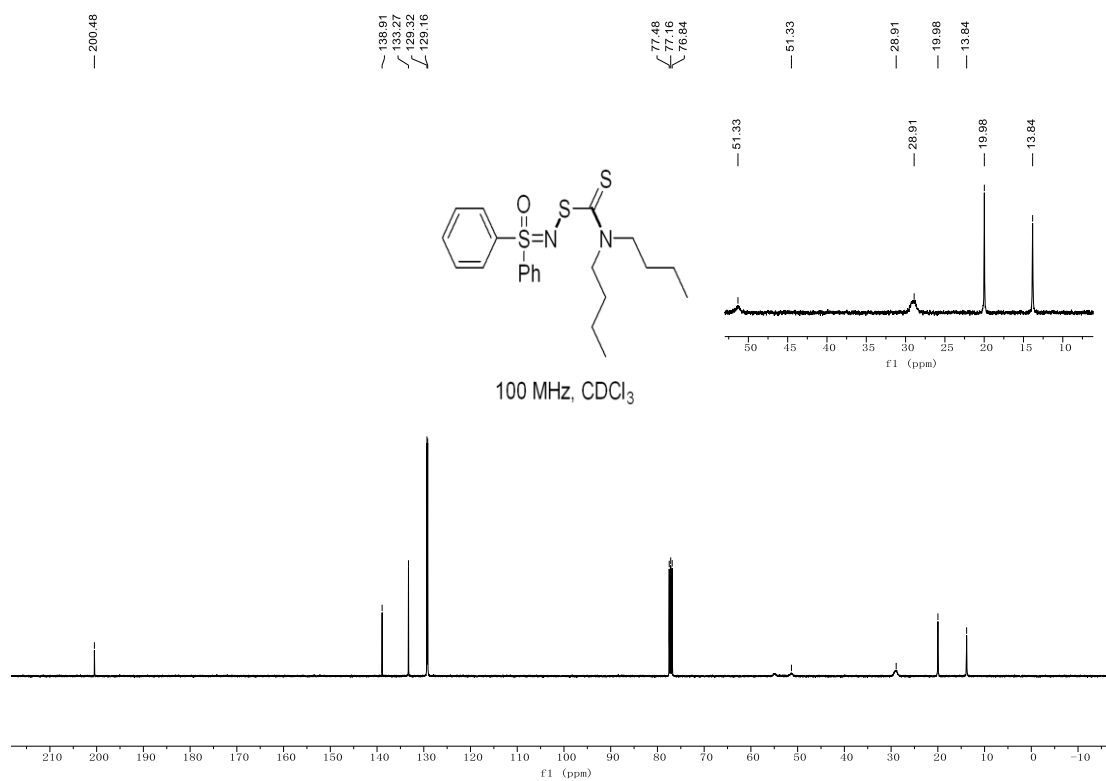

### 3ai-<sup>1</sup>H NMR

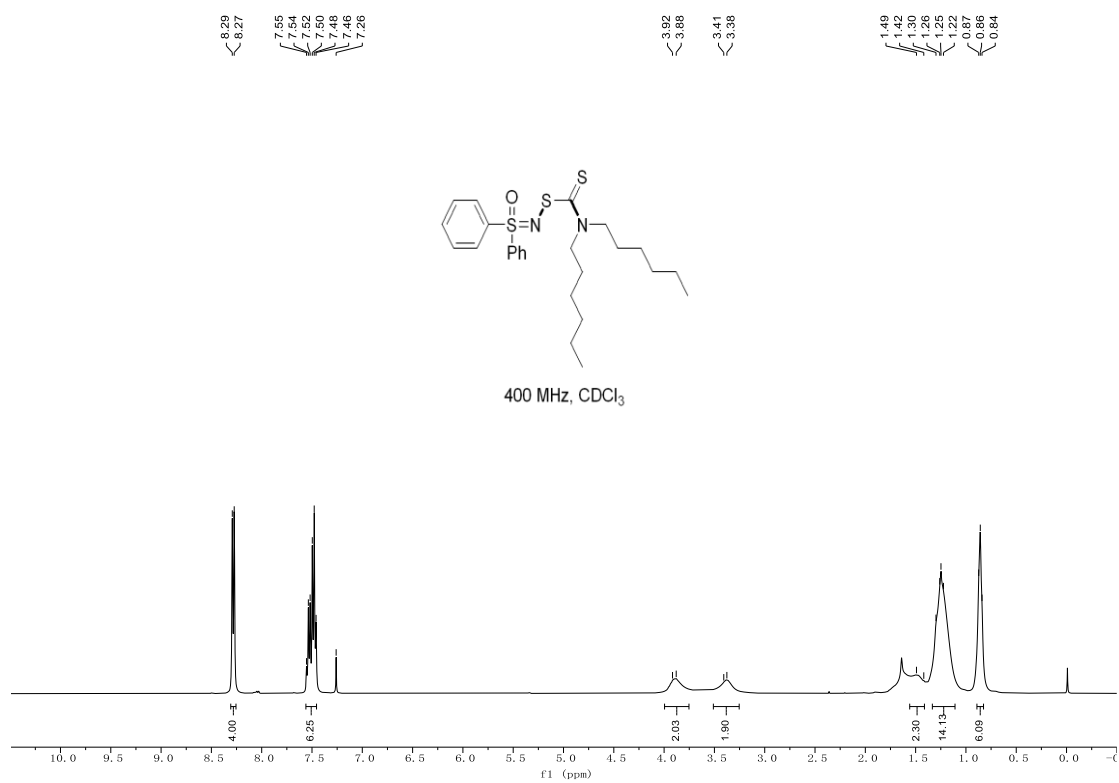

### 3ai-<sup>13</sup>C NMR

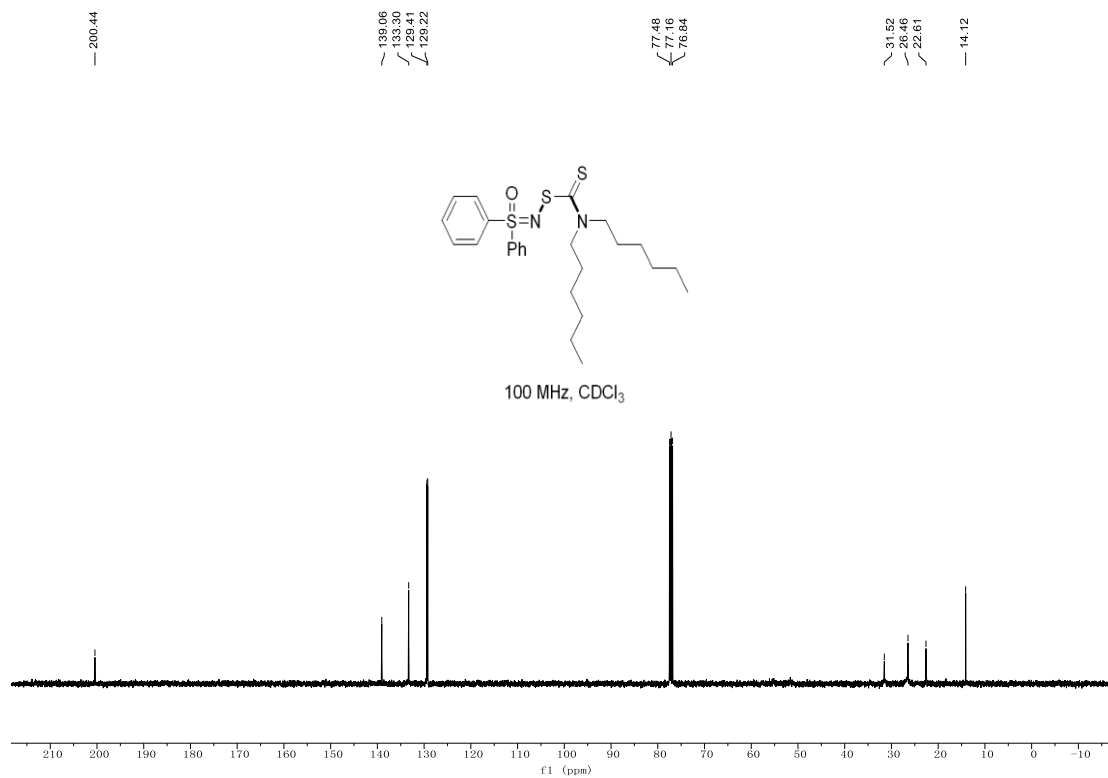

### 3aj-<sup>1</sup>H NMR

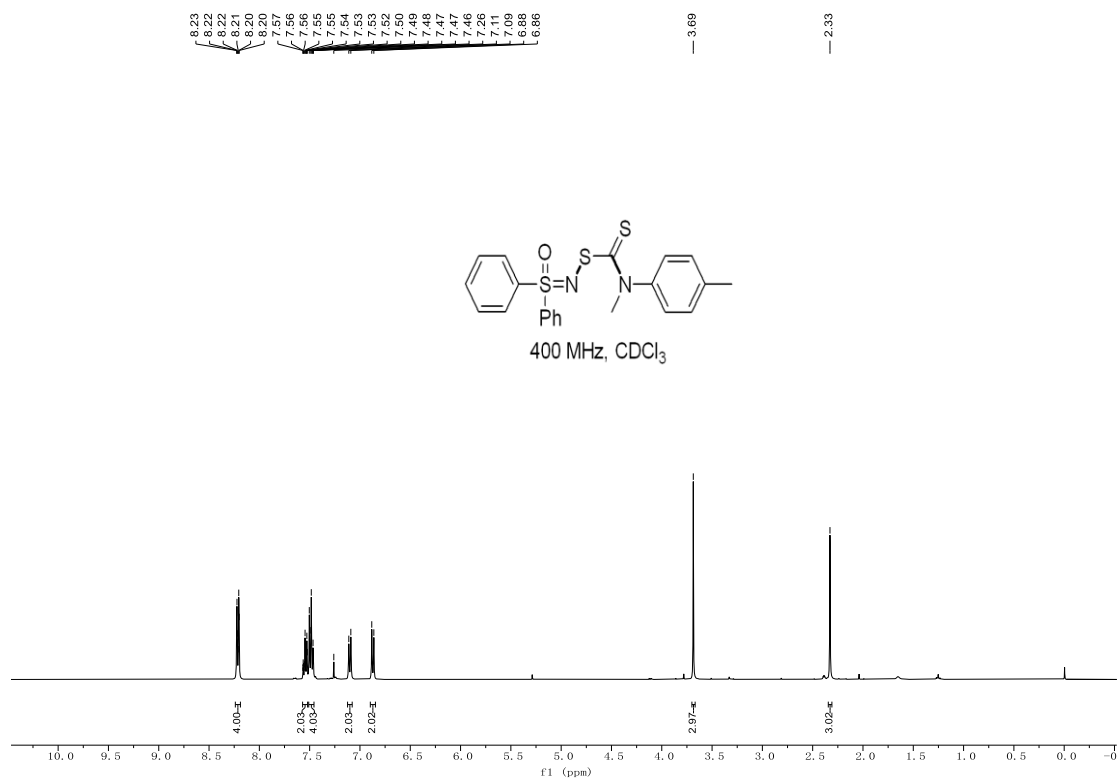

### 3aj-<sup>13</sup>C NMR

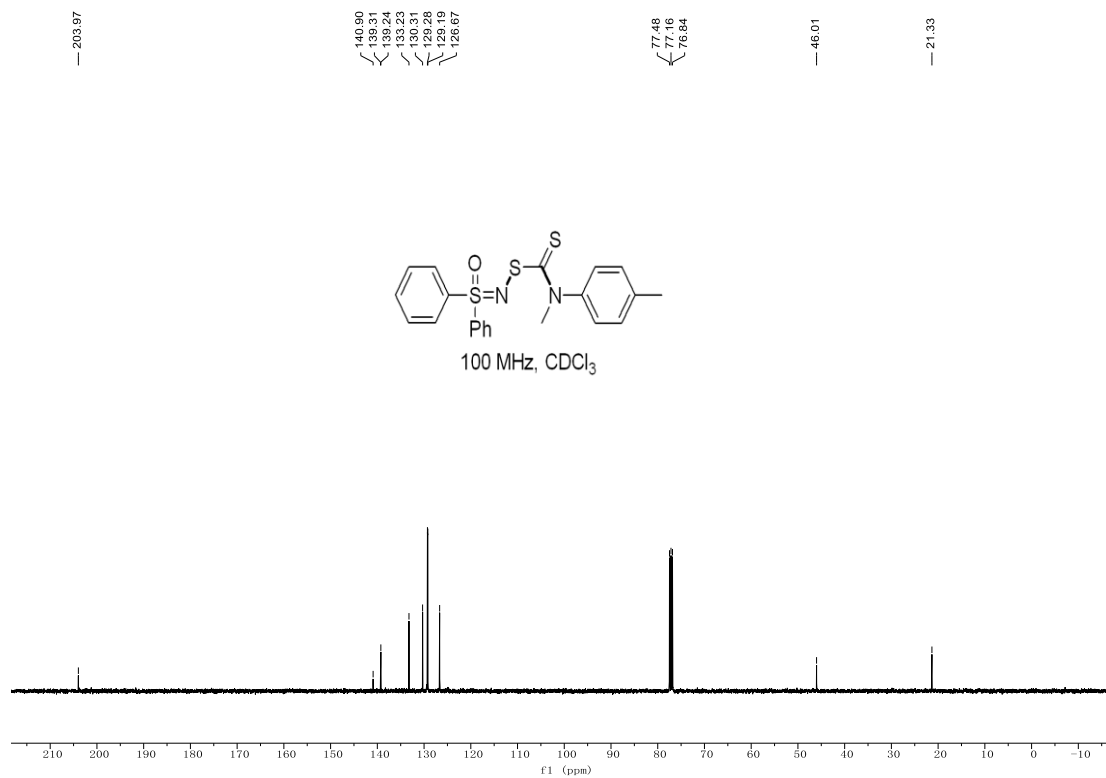

### 3ak-<sup>1</sup>H NMR

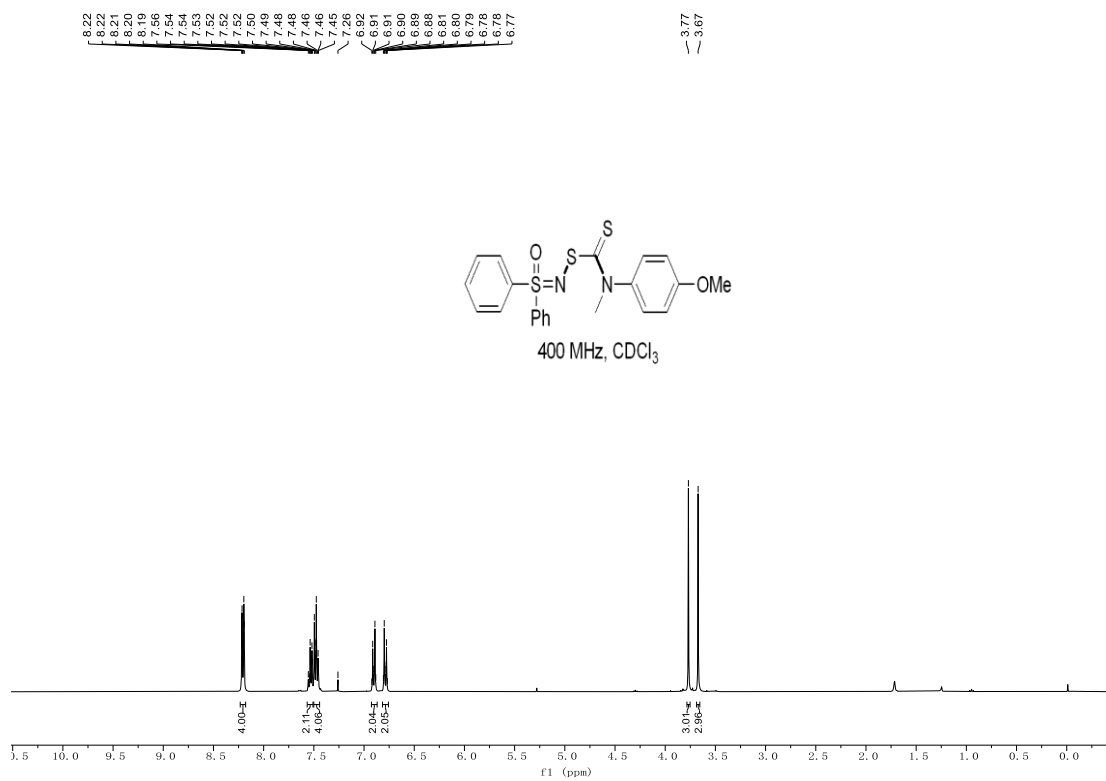

### 3ak-<sup>13</sup>C NMR

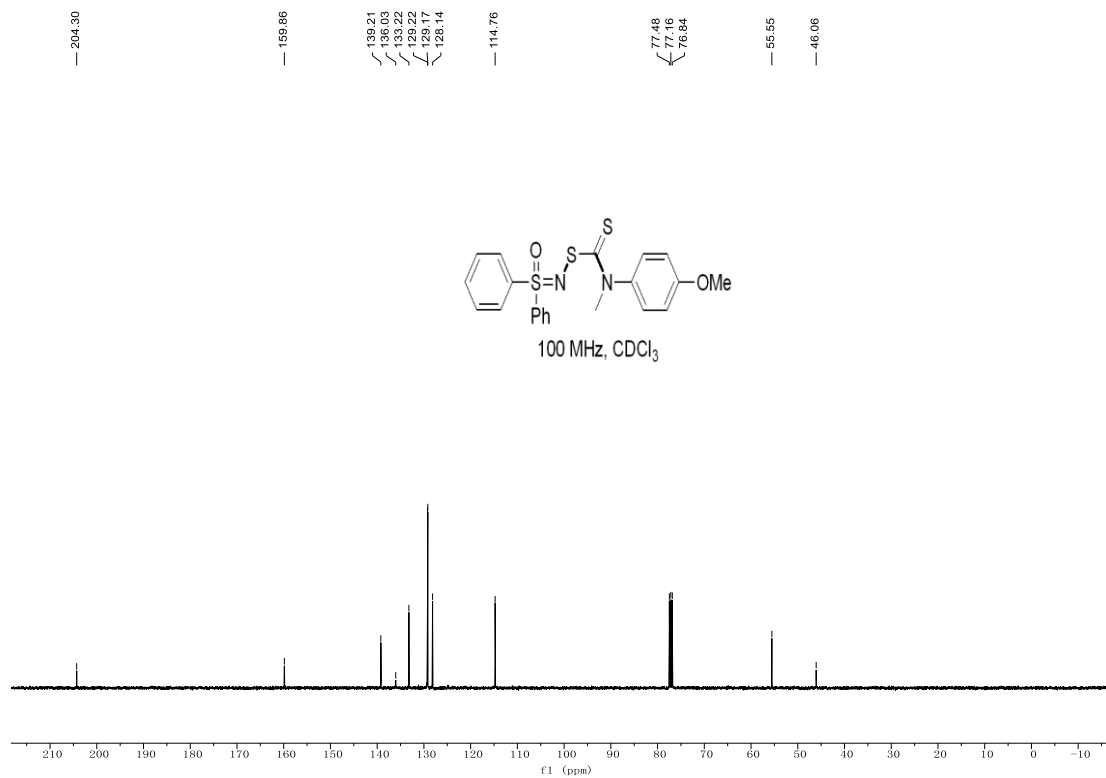

### 3al-<sup>1</sup>H NMR

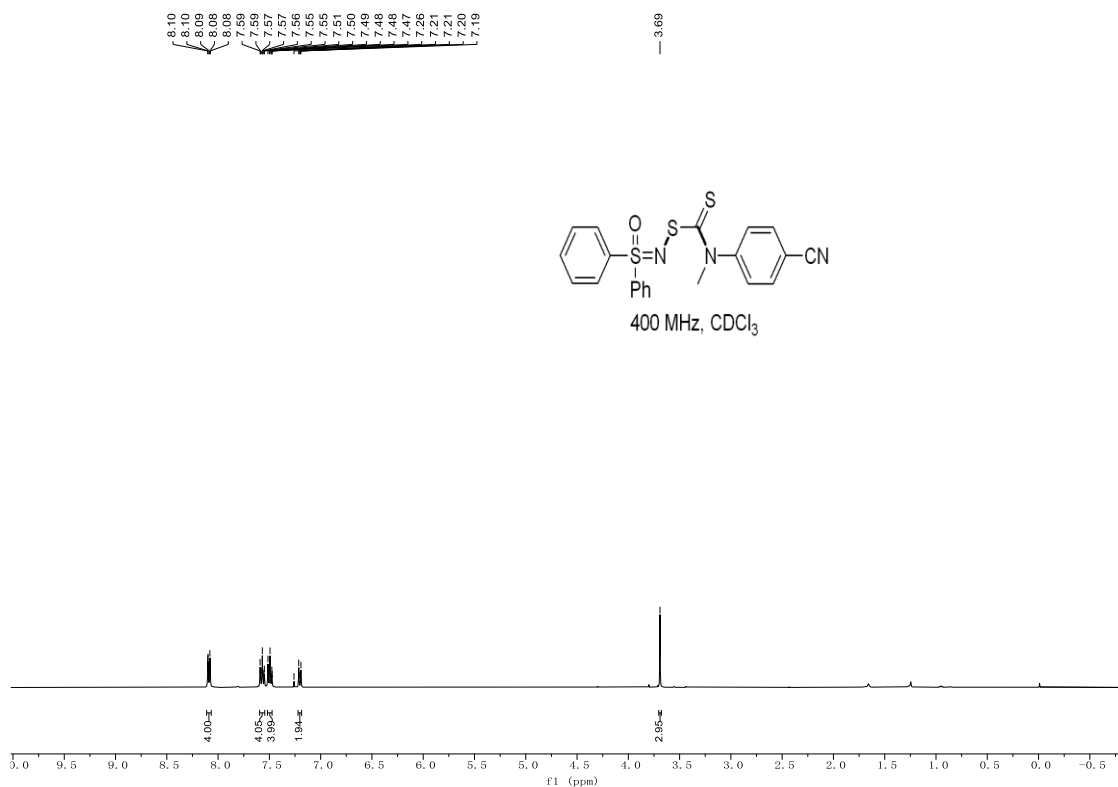

### 3a-<sup>13</sup>C NMR

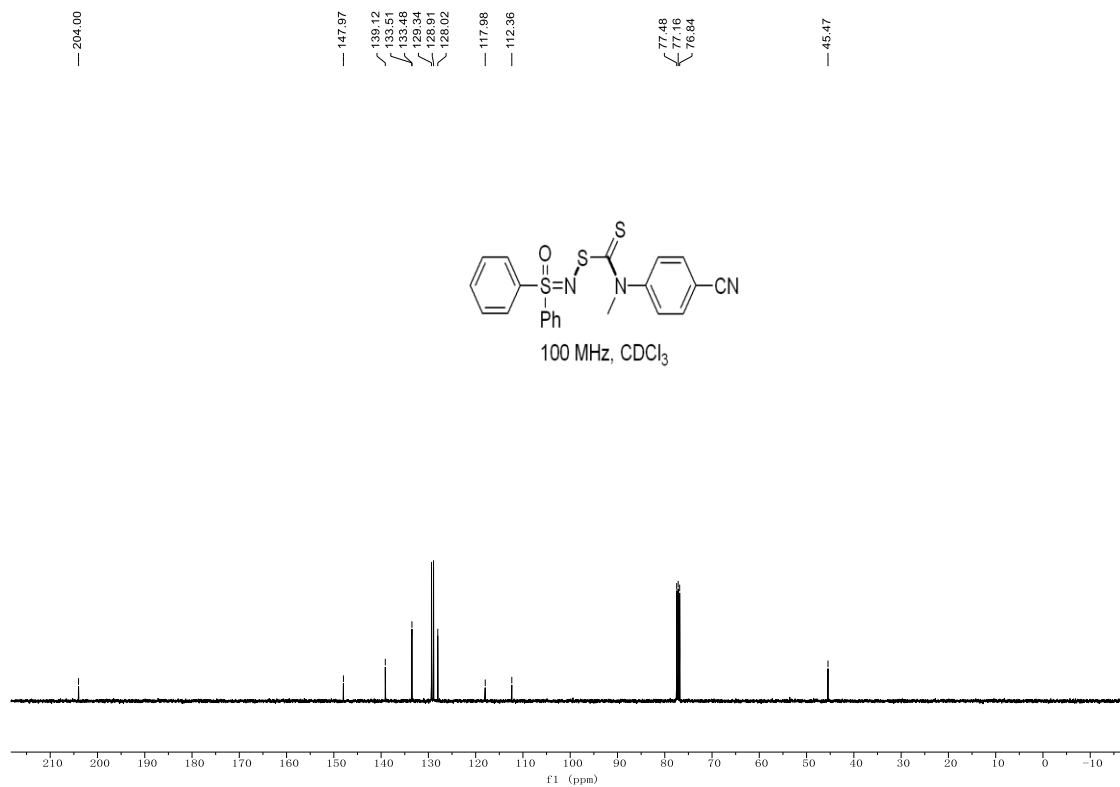

### 4-<sup>1</sup>H NMR

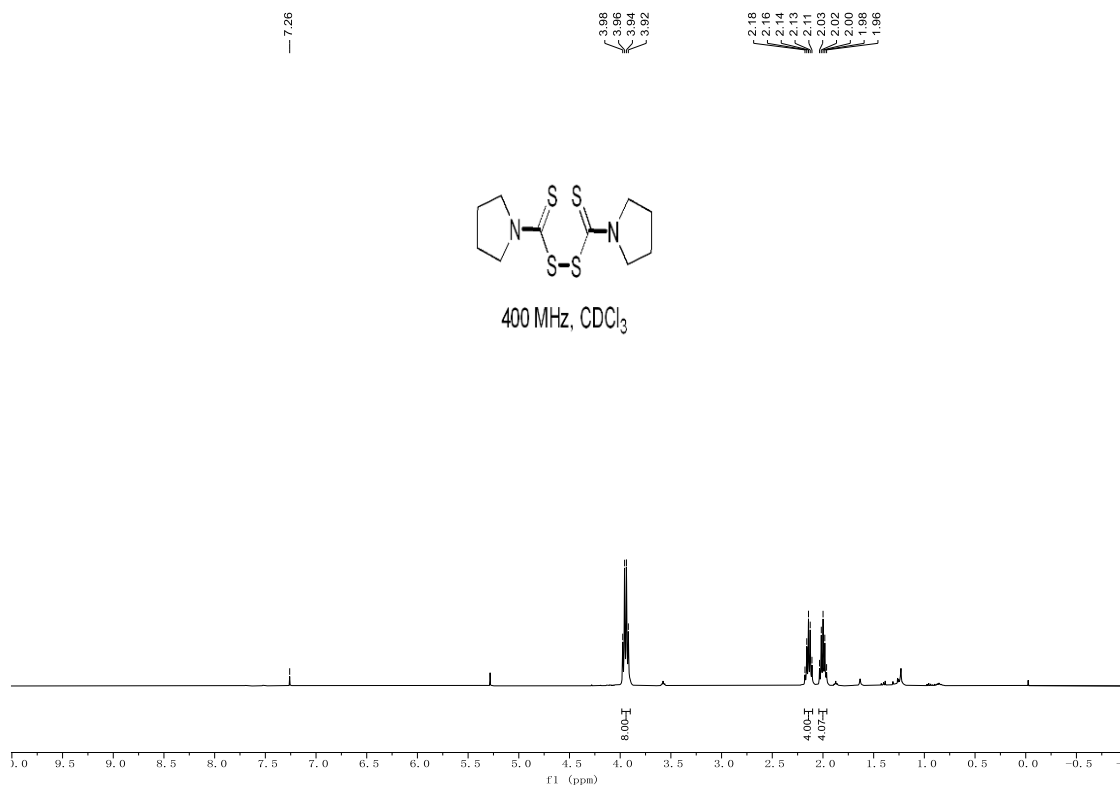



# 4-<sup>13</sup>C NMR

189.21

77.48  
77.06  
76.84

57.01  
51.04

26.65  
24.31

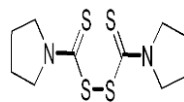

100 MHz, CDCl<sub>3</sub>

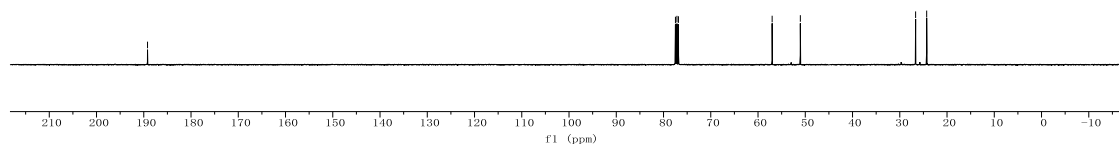

## Crystal data and refinement results

A single crystal for X-ray analysis of **3aa** was obtained by recrystallation from CH<sub>2</sub>Cl<sub>2</sub>.

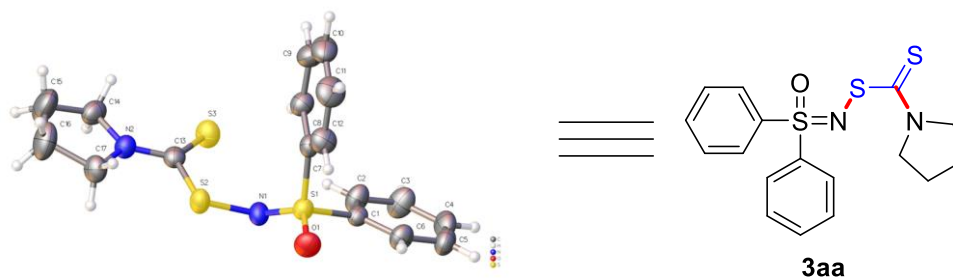

**Figure S3.** Crystal structure of **3aa** (CCDC: 2367753)

**Table S1** Crystal data and structure refinement for **3aa**.

|                                    |                                                                |
|------------------------------------|----------------------------------------------------------------|
| Identification code                | <b>3aa</b>                                                     |
| Empirical formula                  | C <sub>17</sub> H <sub>18</sub> N <sub>2</sub> OS <sub>3</sub> |
| Formula weight                     | 362.51                                                         |
| Temperature/K                      | 293(2)                                                         |
| Crystal system                     | orthorhombic                                                   |
| Space group                        | Pbca                                                           |
| a/Å                                | 15.7490(13)                                                    |
| b/Å                                | 17.8448(12)                                                    |
| c/Å                                | 25.1694(15)                                                    |
| α/°                                | 90                                                             |
| β/°                                | 90                                                             |
| γ/°                                | 90                                                             |
| Volume/Å <sup>3</sup>              | 7073.6(9)                                                      |
| Z                                  | 16                                                             |
| ρ <sub>calc</sub> /cm <sup>3</sup> | 1.362                                                          |
| μ/mm <sup>-1</sup>                 | 0.424                                                          |
| F(000)                             | 3040.0                                                         |
| Crystal size/mm <sup>3</sup>       | 0.18 × 0.14 × 0.08                                             |
| Radiation                          | Mo Kα (λ = 0.71073)                                            |
| 2θ range for data collection/°     | 4.73 to 49.998                                                 |
| Index ranges                       | -18 ≤ h ≤ 18, -21 ≤ k ≤ 20, -29 ≤ l ≤ 29                       |
| Reflections collected              | 27330                                                          |
| Independent reflections            | 6220 [R <sub>int</sub> = 0.0551, R <sub>sigma</sub> = 0.0567]  |

Data/restraints/parameters 6220/0/415  
 Goodness-of-fit on  $F^2$  1.025  
 Final R indexes [ $I \geq 2\sigma(I)$ ]  $R_1 = 0.0493$ ,  $wR_2 = 0.0975$   
 Final R indexes [all data]  $R_1 = 0.0846$ ,  $wR_2 = 0.1133$   
 Largest diff. peak/hole /  $e \text{ \AA}^{-3}$  0.30/-0.27

**Table S2 Fractional Atomic Coordinates ( $\times 10^4$ ) and Equivalent Isotropic Displacement Parameters ( $\text{\AA}^2 \times 10^3$ ) for 3aa.  $U_{eq}$  is defined as 1/3 of the trace of the orthogonalised  $U_{ij}$  tensor.**

| Atom | x          | y          | z          | U(eq)    |
|------|------------|------------|------------|----------|
| C1   | 1836.2(19) | 1206.0(16) | 4272.6(11) | 30.4(7)  |
| C2   | 1718(2)    | 1172.6(18) | 3732.1(12) | 45.8(9)  |
| C3   | 1814(3)    | 493.4(19)  | 3477.6(13) | 55.2(10) |
| C4   | 2023(2)    | -142.1(18) | 3762.8(14) | 49.9(9)  |
| C5   | 2136(2)    | -101.7(18) | 4300.4(14) | 48.9(9)  |
| C6   | 2053(2)    | 577.2(18)  | 4559.8(12) | 43.2(9)  |
| C7   | 2803(2)    | 2473.5(16) | 4556.9(11) | 33.1(7)  |
| C8   | 3074(2)    | 2731.7(17) | 4069.0(12) | 41.2(8)  |
| C9   | 3895(2)    | 2993.2(19) | 4019.4(15) | 52.5(9)  |
| C10  | 4428(2)    | 3007(2)    | 4454.0(17) | 58.4(10) |
| C11  | 4144(3)    | 2753(2)    | 4937.3(16) | 61.4(11) |
| C12  | 3329(2)    | 2479(2)    | 4995.1(13) | 47.9(9)  |
| C13  | 1001(2)    | 3861.3(17) | 3829.1(11) | 35.1(8)  |
| C14  | 785(2)     | 5104.7(17) | 3423.3(13) | 47.2(9)  |
| C15  | 693(3)     | 5866(2)    | 3680.3(16) | 78.8(14) |
| C16  | 529(3)     | 5775(2)    | 4239.5(16) | 73.2(13) |
| C17  | 580(2)     | 4956.7(17) | 4377.4(12) | 45.8(9)  |
| C18  | 1864(2)    | 3819.2(17) | 6432.5(12) | 35.7(8)  |
| C19  | 1830(2)    | 3175.5(18) | 6131.7(13) | 44.3(9)  |
| C20  | 1745(2)    | 2491.2(19) | 6386.2(14) | 55.0(10) |
| C21  | 1708(3)    | 2459(2)    | 6926.5(15) | 61.9(11) |
| C22  | 1737(3)    | 3105(2)    | 7221.1(15) | 78.7(15) |
| C23  | 1805(3)    | 3792.7(19) | 6976.9(13) | 63.9(12) |

|     |            |            |            |          |
|-----|------------|------------|------------|----------|
| C24 | 3051(2)    | 4984.8(18) | 6241.8(13) | 41.3(8)  |
| C25 | 3666(2)    | 4883(2)    | 5854.8(14) | 57.0(10) |
| C26 | 4500(3)    | 5111(2)    | 5966.7(18) | 68.5(12) |
| C27 | 4686(3)    | 5413(2)    | 6453(2)    | 69.5(12) |
| C28 | 4077(3)    | 5502(2)    | 6831.9(17) | 61.4(11) |
| C29 | 3247(2)    | 5296.6(18) | 6727.4(14) | 46.5(9)  |
| C30 | 1209(2)    | 6447.3(18) | 6956.3(12) | 40.3(8)  |
| C31 | 847(2)     | 7638.7(18) | 6501.0(13) | 47.8(9)  |
| C32 | 479(4)     | 8328(2)    | 6738.6(18) | 89.1(16) |
| C33 | 681(4)     | 8363(2)    | 7283.3(18) | 115(2)   |
| C34 | 862(3)     | 7580(2)    | 7465.8(14) | 68.2(12) |
| N1  | 1086.6(16) | 2487.8(14) | 4282.0(10) | 37.2(6)  |
| N2  | 813.5(17)  | 4585.4(14) | 3877.3(9)  | 37.4(6)  |
| N3  | 1323.2(17) | 5170.0(14) | 6407.5(11) | 44.8(7)  |
| N4  | 1014.4(18) | 7168.4(14) | 6970.6(10) | 41.7(7)  |
| O1  | 1629.4(15) | 1920.5(12) | 5171.6(8)  | 47.2(6)  |
| O2  | 1925.2(16) | 4586.6(13) | 5539.6(8)  | 53.6(7)  |
| S1  | 1764.9(5)  | 2070.1(4)  | 4613.0(3)  | 33.2(2)  |
| S2  | 951.9(6)   | 3399.2(5)  | 4458.4(3)  | 40.3(2)  |
| S3  | 1231.1(6)  | 3429.5(5)  | 3262.6(3)  | 47.1(2)  |
| S4  | 1985.3(5)  | 4695.3(5)  | 6108.2(3)  | 38.1(2)  |
| S5  | 1318.9(6)  | 6103.3(5)  | 6296.8(3)  | 44.4(2)  |
| S6  | 1321.7(8)  | 5913.6(6)  | 7493.4(4)  | 64.5(3)  |

**Table S3 Anisotropic Displacement Parameters ( $\text{\AA}^2 \times 10^3$ ) for 3aa. The Anisotropic displacement factor exponent takes the form:  $-2\pi^2[h^2a^{*2}U_{11}+2hka^*b^*U_{12}+\dots]$ .**

| Atom | $U_{11}$ | $U_{22}$ | $U_{33}$ | $U_{23}$  | $U_{13}$  | $U_{12}$ |
|------|----------|----------|----------|-----------|-----------|----------|
| C1   | 29.3(17) | 29.3(16) | 32.5(17) | 1.1(13)   | -3.6(14)  | -2.2(15) |
| C2   | 64(2)    | 36.1(19) | 36.8(19) | 1.1(15)   | -10.2(17) | 0.5(19)  |
| C3   | 84(3)    | 45(2)    | 36.6(19) | -7.8(16)  | -7.0(19)  | -5(2)    |
| C4   | 52(2)    | 31.9(19) | 66(2)    | -12.4(17) | -1.4(19)  | -1.4(18) |
| C5   | 53(2)    | 32.4(19) | 61(2)    | 4.6(16)   | -4.7(19)  | 3.3(18)  |

---

|     |          |          |          |           |          |          |
|-----|----------|----------|----------|-----------|----------|----------|
| C6  | 54(2)    | 39.9(19) | 36.3(18) | 5.2(15)   | -5.2(16) | 0.4(18)  |
| C7  | 35.5(18) | 28.4(16) | 35.4(18) | -2.8(14)  | -2.1(14) | 3.5(15)  |
| C8  | 44(2)    | 38.3(19) | 41.1(19) | 1.0(15)   | -4.8(16) | -2.4(17) |
| C9  | 52(2)    | 46(2)    | 59(2)    | 4.0(18)   | 8(2)     | -8(2)    |
| C10 | 38(2)    | 50(2)    | 87(3)    | -3(2)     | -8(2)    | -6(2)    |
| C11 | 50(2)    | 69(3)    | 66(3)    | 1(2)      | -22(2)   | 0(2)     |
| C12 | 47(2)    | 55(2)    | 42(2)    | 1.9(17)   | -7.2(17) | 2(2)     |
| C13 | 31.5(18) | 34.9(18) | 38.9(18) | -1.5(14)  | -3.3(14) | -2.6(16) |
| C14 | 47(2)    | 44(2)    | 50(2)    | 11.9(16)  | -4.4(17) | -1.7(18) |
| C15 | 112(4)   | 37(2)    | 87(3)    | 8(2)      | 13(3)    | 5(3)     |
| C16 | 100(4)   | 40(2)    | 80(3)    | -10(2)    | -17(3)   | 12(2)    |
| C17 | 54(2)    | 40.3(19) | 43.3(19) | -10.2(15) | -0.9(17) | 3.6(18)  |
| C18 | 35.6(19) | 34.8(17) | 36.8(18) | -1.6(14)  | 1.4(15)  | -1.1(16) |
| C19 | 54(2)    | 40.0(19) | 39.2(18) | -4.9(15)  | -1.3(17) | 2.3(18)  |
| C20 | 78(3)    | 36(2)    | 51(2)    | -10.7(17) | 2(2)     | 1(2)     |
| C21 | 88(3)    | 36(2)    | 62(2)    | 4.4(18)   | 16(2)    | -8(2)    |
| C22 | 142(5)   | 53(2)    | 42(2)    | 3.1(18)   | 22(3)    | -15(3)   |
| C23 | 111(4)   | 39(2)    | 42(2)    | -9.4(17)  | 12(2)    | -14(2)   |
| C24 | 41(2)    | 36.2(18) | 47(2)    | 12.5(15)  | 0.5(17)  | 1.5(17)  |
| C25 | 54(2)    | 67(3)    | 49(2)    | 18.1(19)  | 6(2)     | 3(2)     |
| C26 | 43(2)    | 77(3)    | 85(3)    | 32(2)     | 18(2)    | 3(2)     |
| C27 | 47(3)    | 54(3)    | 107(4)   | 22(3)     | -12(3)   | -12(2)   |
| C28 | 56(3)    | 43(2)    | 86(3)    | 0(2)      | -21(2)   | 1(2)     |
| C29 | 40(2)    | 41(2)    | 58(2)    | -2.3(17)  | -7.8(18) | 2.0(18)  |
| C30 | 41(2)    | 40(2)    | 39.7(18) | 3.3(14)   | -0.7(16) | 0.2(17)  |
| C31 | 54(2)    | 41(2)    | 49(2)    | 13.3(16)  | 2.5(18)  | 2.7(19)  |
| C32 | 131(5)   | 46(3)    | 90(3)    | 0(2)      | -15(3)   | 31(3)    |
| C33 | 204(7)   | 57(3)    | 85(4)    | -6(3)     | 16(4)    | 34(4)    |
| C34 | 97(3)    | 57(2)    | 51(2)    | -6.3(19)  | 4(2)     | 13(3)    |
| N1  | 35.3(16) | 31.4(14) | 44.9(15) | -2.2(12)  | -2.1(12) | 3.1(13)  |
| N2  | 41.3(16) | 33.0(15) | 37.9(15) | -1.0(12)  | -1.5(13) | 0.9(13)  |
| N3  | 37.5(16) | 33.9(15) | 63.0(18) | -0.8(13)  | 1.5(15)  | 0.6(14)  |
| N4  | 49.7(18) | 36.0(16) | 39.3(15) | 4.4(12)   | 0.1(13)  | -0.7(14) |

---

|    |          |          |          |          |          |          |
|----|----------|----------|----------|----------|----------|----------|
| O1 | 61.4(16) | 50.9(14) | 29.5(11) | -0.7(10) | 9.0(11)  | 0.4(13)  |
| O2 | 68.1(17) | 59.8(15) | 33.0(12) | 3.7(11)  | -7.0(12) | -5.0(14) |
| S1 | 38.2(5)  | 31.1(4)  | 30.4(4)  | -0.9(3)  | 0.6(4)   | 0.5(4)   |
| S2 | 50.1(5)  | 33.4(4)  | 37.5(4)  | -1.6(4)  | 4.4(4)   | 7.4(4)   |
| S3 | 58.7(6)  | 45.7(5)  | 37.0(5)  | -7.3(4)  | 0.9(4)   | 5.2(5)   |
| S4 | 38.3(5)  | 38.3(5)  | 37.8(5)  | 2.6(4)   | -3.0(4)  | -1.6(4)  |
| S5 | 53.6(6)  | 38.2(5)  | 41.5(5)  | 4.2(4)   | -5.8(4)  | 5.0(5)   |
| S6 | 91.1(9)  | 58.4(6)  | 44.1(5)  | 18.3(4)  | 5.9(5)   | 20.1(6)  |

**Table S4 Bond Lengths for 3aa.**

| Atom | Atom | Length/Å | Atom | Atom | Length/Å |
|------|------|----------|------|------|----------|
| C1   | C2   | 1.374(4) | C19  | C20  | 1.385(4) |
| C1   | C6   | 1.378(4) | C20  | C21  | 1.362(5) |
| C1   | S1   | 1.768(3) | C21  | C22  | 1.373(5) |
| C2   | C3   | 1.379(4) | C22  | C23  | 1.376(5) |
| C3   | C4   | 1.382(5) | C24  | C25  | 1.385(5) |
| C4   | C5   | 1.367(4) | C24  | C29  | 1.378(4) |
| C5   | C6   | 1.382(4) | C24  | S4   | 1.788(3) |
| C7   | C8   | 1.379(4) | C25  | C26  | 1.404(5) |
| C7   | C12  | 1.379(4) | C26  | C27  | 1.369(5) |
| C7   | S1   | 1.793(3) | C27  | C28  | 1.362(5) |
| C8   | C9   | 1.380(5) | C28  | C29  | 1.382(5) |
| C9   | C10  | 1.379(5) | C30  | N4   | 1.323(4) |
| C10  | C11  | 1.373(5) | C30  | S5   | 1.778(3) |
| C11  | C12  | 1.381(5) | C30  | S6   | 1.663(3) |
| C13  | N2   | 1.331(4) | C31  | C32  | 1.486(5) |
| C13  | S2   | 1.787(3) | C31  | N4   | 1.473(4) |
| C13  | S3   | 1.661(3) | C32  | C33  | 1.409(5) |
| C14  | C15  | 1.512(5) | C33  | C34  | 1.498(5) |
| C14  | N2   | 1.472(4) | C34  | N4   | 1.466(4) |
| C15  | C16  | 1.440(5) | N1   | S1   | 1.546(3) |
| C16  | C17  | 1.503(5) | N1   | S2   | 1.699(3) |

---

|     |     |          |    |    |          |
|-----|-----|----------|----|----|----------|
| C17 | N2  | 1.469(4) | N3 | S4 | 1.540(3) |
| C18 | C19 | 1.377(4) | N3 | S5 | 1.689(3) |
| C18 | C23 | 1.374(4) | O1 | S1 | 1.447(2) |
| C18 | S4  | 1.774(3) | O2 | S4 | 1.447(2) |

**Table S5 Bond Angles for 3aa.**

| Atom | Atom | Atom | Angle/°    | Atom | Atom | Atom | Angle/°    |
|------|------|------|------------|------|------|------|------------|
| C2   | C1   | C6   | 121.2(3)   | C24  | C25  | C26  | 118.4(4)   |
| C2   | C1   | S1   | 120.6(2)   | C27  | C26  | C25  | 119.6(4)   |
| C6   | C1   | S1   | 118.2(2)   | C28  | C27  | C26  | 121.4(4)   |
| C1   | C2   | C3   | 118.9(3)   | C27  | C28  | C29  | 120.1(4)   |
| C2   | C3   | C4   | 120.4(3)   | C24  | C29  | C28  | 119.2(4)   |
| C5   | C4   | C3   | 120.1(3)   | N4   | C30  | S5   | 112.6(2)   |
| C4   | C5   | C6   | 120.1(3)   | N4   | C30  | S6   | 124.0(2)   |
| C1   | C6   | C5   | 119.3(3)   | S6   | C30  | S5   | 123.4(2)   |
| C8   | C7   | S1   | 119.1(2)   | N4   | C31  | C32  | 102.6(3)   |
| C12  | C7   | C8   | 121.7(3)   | C33  | C32  | C31  | 109.9(4)   |
| C12  | C7   | S1   | 119.1(2)   | C32  | C33  | C34  | 107.5(4)   |
| C7   | C8   | C9   | 118.9(3)   | N4   | C34  | C33  | 103.7(3)   |
| C10  | C9   | C8   | 120.3(3)   | S1   | N1   | S2   | 114.00(15) |
| C11  | C10  | C9   | 119.9(4)   | C13  | N2   | C14  | 123.2(2)   |
| C10  | C11  | C12  | 120.9(3)   | C13  | N2   | C17  | 124.9(2)   |
| C7   | C12  | C11  | 118.4(3)   | C17  | N2   | C14  | 111.9(2)   |
| N2   | C13  | S2   | 111.0(2)   | S4   | N3   | S5   | 117.67(17) |
| N2   | C13  | S3   | 125.2(2)   | C30  | N4   | C31  | 125.0(3)   |
| S3   | C13  | S2   | 123.80(19) | C30  | N4   | C34  | 123.2(3)   |
| N2   | C14  | C15  | 103.7(3)   | C34  | N4   | C31  | 111.6(3)   |
| C16  | C15  | C14  | 109.5(3)   | C1   | S1   | C7   | 104.72(14) |
| C15  | C16  | C17  | 109.0(3)   | N1   | S1   | C1   | 101.72(14) |
| N2   | C17  | C16  | 104.7(3)   | N1   | S1   | C7   | 113.22(14) |
| C19  | C18  | S4   | 119.1(2)   | O1   | S1   | C1   | 108.63(13) |
| C23  | C18  | C19  | 121.1(3)   | O1   | S1   | C7   | 106.58(14) |

|     |     |     |          |     |    |     |            |
|-----|-----|-----|----------|-----|----|-----|------------|
| C23 | C18 | S4  | 119.8(2) | O1  | S1 | N1  | 120.70(14) |
| C18 | C19 | C20 | 119.0(3) | N1  | S2 | C13 | 101.80(13) |
| C21 | C20 | C19 | 120.2(3) | C18 | S4 | C24 | 105.61(15) |
| C20 | C21 | C22 | 120.1(3) | N3  | S4 | C18 | 100.76(15) |
| C21 | C22 | C23 | 120.7(4) | N3  | S4 | C24 | 112.62(15) |
| C18 | C23 | C22 | 118.8(3) | O2  | S4 | C18 | 109.27(14) |
| C25 | C24 | S4  | 119.1(3) | O2  | S4 | C24 | 106.63(15) |
| C29 | C24 | C25 | 121.3(3) | O2  | S4 | N3  | 120.87(15) |
| C29 | C24 | S4  | 119.6(3) | N3  | S5 | C30 | 100.76(14) |

**Table S6 Torsion Angles for 3aa.**

| A   | B   | C   | D   | Angle/°   | A   | B   | C   | D   | Angle/°   |
|-----|-----|-----|-----|-----------|-----|-----|-----|-----|-----------|
| C1  | C2  | C3  | C4  | 0.3(6)    | C25 | C24 | S4  | N3  | -150.5(3) |
| C2  | C1  | C6  | C5  | -1.3(5)   | C25 | C24 | S4  | O2  | -15.7(3)  |
| C2  | C1  | S1  | C7  | -85.4(3)  | C25 | C26 | C27 | C28 | -0.2(6)   |
| C2  | C1  | S1  | N1  | 32.7(3)   | C26 | C27 | C28 | C29 | -1.1(6)   |
| C2  | C1  | S1  | O1  | 161.0(3)  | C27 | C28 | C29 | C24 | 1.6(5)    |
| C2  | C3  | C4  | C5  | -0.1(6)   | C29 | C24 | C25 | C26 | -0.4(5)   |
| C3  | C4  | C5  | C6  | -0.8(6)   | C29 | C24 | S4  | C18 | -78.9(3)  |
| C4  | C5  | C6  | C1  | 1.4(5)    | C29 | C24 | S4  | N3  | 30.1(3)   |
| C6  | C1  | C2  | C3  | 0.4(5)    | C29 | C24 | S4  | O2  | 164.9(3)  |
| C6  | C1  | S1  | C7  | 91.5(3)   | C31 | C32 | C33 | C34 | -23.1(7)  |
| C6  | C1  | S1  | N1  | -150.4(3) | C32 | C31 | N4  | C30 | 167.7(4)  |
| C6  | C1  | S1  | O1  | -22.1(3)  | C32 | C31 | N4  | C34 | -7.0(4)   |
| C7  | C8  | C9  | C10 | -1.1(5)   | C32 | C33 | C34 | N4  | 17.5(6)   |
| C8  | C7  | C12 | C11 | 0.2(5)    | C33 | C34 | N4  | C30 | 179.2(4)  |
| C8  | C7  | S1  | C1  | 70.4(3)   | C33 | C34 | N4  | C31 | -6.0(5)   |
| C8  | C7  | S1  | N1  | -39.5(3)  | N2  | C13 | S2  | N1  | 173.1(2)  |
| C8  | C7  | S1  | O1  | -174.6(2) | N2  | C14 | C15 | C16 | -9.5(5)   |
| C8  | C9  | C10 | C11 | 0.6(6)    | N4  | C30 | S5  | N3  | -167.0(3) |
| C9  | C10 | C11 | C12 | 0.3(6)    | N4  | C31 | C32 | C33 | 18.5(5)   |
| C10 | C11 | C12 | C7  | -0.7(6)   | S1  | C1  | C2  | C3  | 177.3(3)  |



---

|                 |           |                |             |
|-----------------|-----------|----------------|-------------|
| C12 C7 C8 C9    | 0.7(5)    | S1 C1 C6 C5    | -178.2(3)   |
| C12 C7 S1 C1    | -105.9(3) | S1 C7 C8 C9    | -175.5(3)   |
| C12 C7 S1 N1    | 144.1(3)  | S1 C7 C12 C11  | 176.4(3)    |
| C12 C7 S1 O1    | 9.1(3)    | S1 N1 S2 C13   | 131.01(17)  |
| C14 C15 C16 C17 | 4.6(6)    | S2 C13 N2 C14  | -178.7(2)   |
| C15 C14 N2 C13  | -171.0(3) | S2 C13 N2 C17  | -1.2(4)     |
| C15 C14 N2 C17  | 11.1(4)   | S2 N1 S1 C1    | -172.55(15) |
| C15 C16 C17 N2  | 2.2(5)    | S2 N1 S1 C7    | -60.75(19)  |
| C16 C17 N2 C13  | 173.7(3)  | S2 N1 S1 O1    | 67.3(2)     |
| C16 C17 N2 C14  | -8.6(4)   | S3 C13 N2 C14  | 0.1(5)      |
| C18 C19 C20 C21 | -1.0(6)   | S3 C13 N2 C17  | 177.6(3)    |
| C19 C18 C23 C22 | 2.1(6)    | S3 C13 S2 N1   | -5.7(2)     |
| C19 C18 S4 C24  | -107.3(3) | S4 C18 C19 C20 | 179.3(3)    |
| C19 C18 S4 N3   | 135.4(3)  | S4 C18 C23 C22 | -178.0(4)   |
| C19 C18 S4 O2   | 7.1(3)    | S4 C24 C25 C26 | -179.7(3)   |
| C19 C20 C21 C22 | 1.4(7)    | S4 C24 C29 C28 | 178.4(3)    |
| C20 C21 C22 C23 | -0.1(8)   | S4 N3 S5 C30   | -135.98(19) |
| C21 C22 C23 C18 | -1.6(7)   | S5 C30 N4 C31  | 3.9(4)      |
| C23 C18 C19 C20 | -0.8(6)   | S5 C30 N4 C34  | 178.0(3)    |
| C23 C18 S4 C24  | 72.8(3)   | S5 N3 S4 C18   | 170.44(17)  |
| C23 C18 S4 N3   | -44.6(3)  | S5 N3 S4 C24   | 58.4(2)     |
| C23 C18 S4 O2   | -172.8(3) | S5 N3 S4 O2    | -69.2(2)    |
| C24 C25 C26 C27 | 0.9(6)    | S6 C30 N4 C31  | -175.1(3)   |
| C25 C24 C29 C28 | -0.9(5)   | S6 C30 N4 C34  | -0.9(5)     |
| C25 C24 S4 C18  | 100.5(3)  | S6 C30 S5 N3   | 12.0(3)     |

**Table S7 Hydrogen Atom Coordinates ( $\text{\AA}\times 10^4$ ) and Isotropic Displacement Parameters ( $\text{\AA}^2\times 10^3$ ) for 3aa.**

| Atom | x    | y    | z    | U(eq) |
|------|------|------|------|-------|
| H2   | 1575 | 1601 | 3541 | 55    |
| H3   | 1739 | 463  | 3112 | 66    |
| H4   | 2086 | -598 | 3589 | 60    |
| H5   | 2270 | -531 | 4492 | 59    |

---

|      |      |      |      |     |
|------|------|------|------|-----|
| H6   | 2142 | 609  | 4924 | 52  |
| H8   | 2709 | 2730 | 3778 | 49  |
| H9   | 4089 | 3161 | 3691 | 63  |
| H10  | 4979 | 3188 | 4420 | 70  |
| H11  | 4504 | 2766 | 5230 | 74  |
| H12  | 3139 | 2302 | 5322 | 58  |
| H14A | 305  | 4996 | 3194 | 57  |
| H14B | 1304 | 5076 | 3216 | 57  |
| H15A | 1210 | 6154 | 3630 | 95  |
| H15B | 228  | 6138 | 3516 | 95  |
| H16A | -31  | 5967 | 4325 | 88  |
| H16B | 944  | 6054 | 4444 | 88  |
| H17A | 1007 | 4869 | 4648 | 55  |
| H17B | 37   | 4775 | 4506 | 55  |
| H19  | 1864 | 3200 | 5763 | 53  |
| H20  | 1713 | 2053 | 6188 | 66  |
| H21  | 1664 | 1997 | 7096 | 74  |
| H22  | 1711 | 3079 | 7590 | 94  |
| H23  | 1810 | 4231 | 7177 | 77  |
| H25  | 3529 | 4670 | 5529 | 68  |
| H26  | 4924 | 5056 | 5712 | 82  |
| H27  | 5240 | 5561 | 6526 | 83  |
| H28  | 4220 | 5701 | 7162 | 74  |
| H29  | 2827 | 5368 | 6982 | 56  |
| H31A | 448  | 7399 | 6262 | 57  |
| H31B | 1367 | 7748 | 6310 | 57  |
| H32A | 703  | 8766 | 6558 | 107 |
| H32B | -133 | 8325 | 6694 | 107 |
| H33A | 209  | 8571 | 7482 | 138 |
| H33B | 1175 | 8679 | 7338 | 138 |
| H34A | 1359 | 7566 | 7694 | 82  |
| H34B | 382  | 7373 | 7657 | 82  |

---

**checkCIF/PLATON report**

Structure factors have been supplied for datablock(s) exp\_14482\_auto

THIS REPORT IS FOR GUIDANCE ONLY. IF USED AS PART OF A REVIEW PROCEDURE FOR PUBLICATION, IT SHOULD NOT REPLACE THE EXPERTISE OF AN EXPERIENCED CRYSTALLOGRAPHIC REFEREE.

No syntax errors found.      CIF dictionary      Interpreting this report

**Datablock: exp\_14482\_auto**

---

|                 |                      |                    |               |
|-----------------|----------------------|--------------------|---------------|
| Bond precision: | C-C = 0.0051 A       | Wavelength=0.71073 |               |
| Cell:           | a=15.7490(13)        | b=17.8448(12)      | c=25.1694(15) |
|                 | alpha=90             | beta=90            | gamma=90      |
| Temperature:    | 293 K                |                    |               |
|                 | Calculated           | Reported           |               |
| Volume Space    | 7073.6(9)            | 7073.6(9)          |               |
| groupHall group | P b c a              | P b c a            |               |
| Moiety formula  | -P 2ac 2abC17        | -P 2ac 2ab         |               |
|                 | H18 N2      O S3     | C17 H18 N2 O S3    |               |
| Sum formula     | C17 H18 N2      O S3 | C17 H18 N2 O S3    |               |
| Mr              | 362.51               | 362.51             |               |
| Dx,g cm-3       | 1.362                | 1.362              |               |
| Z               | 16                   | 16                 |               |
| Mu (mm-1)       | 0.424                | 0.424              |               |
| F000            | 3040.0               | 3040.0             |               |
| F000'           | 3046.83              |                    |               |
| h,k,lmax        | 18,21,29             | 18,21,29           |               |
| Nref            | 6226                 | 6220               |               |
| Tmin,Tmax       | 0.931,0.967          | 0.901,1.000        |               |

---

Tmin' 0.927

Correction method= # Reported T Limits: Tmin=0.901 Tmax=1.000AbsCorr = MULTI-SCAN

Data completeness= 0.999

Theta(max)= 24.999

R(reflections)= 0.0493( 4296)

wR2(reflections)=

0.1133( 6220)

S = 1.025

Npar= 415

---

The following ALERTS were generated. Each ALERT has the format

**test-name\_ALERT\_alert-type\_alert-level.**

Click on the hyperlinks for more details of the test.

---

 **Alert level A**

PLAT902\_ALERT\_1\_A No (Interpretable) Reflections Found in FCF .... [Please Check](#)

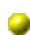

**Alert level C**

|                                         |                                           |              |                         |           |       |
|-----------------------------------------|-------------------------------------------|--------------|-------------------------|-----------|-------|
| PLAT220_ALERT_2_C NonSolvent            | Resd 2                                    | C            | Ueq(max)/Ueq(min) Range | 3.2       | Ratio |
| PLAT241_ALERT_2_C High                  | 'MainMol' Ueq as Compared to Neighbors of |              |                         | C15 Check |       |
| PLAT241_ALERT_2_C High                  | 'MainMol' Ueq as Compared to Neighbors of |              |                         | C22 Check |       |
| PLAT241_ALERT_2_C High                  | 'MainMol' Ueq as Compared to Neighbors of |              |                         | C33 Check |       |
| PLAT242_ALERT_2_C Low                   | 'MainMol' Ueq as Compared to Neighbors of |              |                         | C31 Check |       |
| PLAT340_ALERT_3_C Low Bond Precision on | C-C Bonds .....                           | 0.00513 Ang. | PLAT360_ALERT_2_C       |           |       |
| Short C(sp3)-C(sp3) Bond                | C32                                       | - C33        | .                       | 1.41 Ang. |       |

---

 **Alert level G**

|                                                                    |                                         |                              |
|--------------------------------------------------------------------|-----------------------------------------|------------------------------|
| PLAT012_ALERT_1_G No                                               | _shelx_res_checksum Found in CIF .....  | <a href="#">Please Check</a> |
| PLAT199_ALERT_1_G Reported                                         | _cell_measurement_temperature ..... (K) | 293 Check                    |
| PLAT200_ALERT_1_G Reported                                         | _diffn_ambient_temperature ..... (K)    | 293 Check                    |
| PLAT967_ALERT_5_G Note: Two-Theta Cutoff Value in Embedded .res .. |                                         | 50.0 Degree                  |

---

1 **ALERT level A** = Most likely a serious problem - resolve or explain

0 **ALERT level B** = A potentially serious problem, consider carefully

7 **ALERT level C** = Check. Ensure it is not caused by an omission or oversight

4 **ALERT level G** = General information/check it is not something unexpected

---

4 ALERT type 1 CIF construction/syntax error, inconsistent or missing data

6 ALERT type 2 Indicator that the structure model may be wrong or deficient

1 ALERT type 3 Indicator that the structure quality may be low

0 ALERT type 4 Improvement, methodology, query or suggestion

1 ALERT type 5 Informative message, check

---

---

It is advisable to attempt to resolve as many as possible of the alerts in all categories. Often the minor alerts point to easily fixed oversights, errors and omissions in your CIF or refinement strategy, so attention to these fine details can be worthwhile. In order to resolve some of the more serious problems it may be necessary to carry out additional measurements or structure refinements. However, the purpose of your study may justify the reported deviations and the more serious of these should normally be commented upon in the discussion or experimental section of a paper or in the "special\_details" fields of the CIF. checkCIF was carefully designed to identify outliers and unusual parameters, but every test has its limitations and alerts that are not important in a particular case may appear. Conversely, the absence of alerts does not guarantee there are no aspects of the results needing attention. It is up to the individual to critically assess their own results and, if necessary, seek expert advice.

### **Publication of your CIF in IUCr journals**

A basic structural check has been run on your CIF. These basic checks will be run on all CIFs submitted for publication in IUCr journals (*Acta Crystallographica*, *Journal of Applied Crystallography*, *Journal of Synchrotron Radiation*); however, if you intend to submit to *Acta Crystallographica Section C* or *E* or *IUCrData*, you should make sure that full publication checks are run on the final version of your CIF prior to submission.

### **Publication of your CIF in other journals**

Please refer to the *Notes for Authors* of the relevant journal for any special instructions relating to CIF submission.

### **Validation response form**

Please find below a validation response form (VRF) that can be filled in and pasted into your CIF.

# start Validation Reply Form

\_vrf\_PLAT902\_exp\_14482\_auto

;

PROBLEM: No (Interpretable) Reflections Found in FCF ....

Please Check

---

RESPONSE: ...

;

\_vrf\_PLAT220\_exp\_14482\_auto

;

PROBLEM: NonSolvent Resd 2 C Ueq(max)/Ueq(min) Range 3.2 Ratio

RESPONSE: ...

;

\_vrf\_PLAT241\_exp\_14482\_auto

;

PROBLEM: High 'MainMol' Ueq as Compared to Neighbors of C15 Check

RESPONSE: ...

;

\_vrf\_PLAT242\_exp\_14482\_auto

;

PROBLEM: Low 'MainMol' Ueq as Compared to Neighbors of C31 Check

RESPONSE: ...

;

\_vrf\_PLAT340\_exp\_14482\_auto

;

PROBLEM: Low Bond Precision on C-C Bonds ..... 0.00513 Ang.

RESPONSE: ...

;

\_vrf\_PLAT360\_exp\_14482\_auto

;

PROBLEM: Short C(sp3)-C(sp3) Bond C32 - C33 . 1.41 Ang.

RESPONSE: ...

;

# end Validation Reply Form

---



PLATON version of 13/05/2024; check.def file version of 04/05/2024

Datablock exp\_14482\_auto - ellipsoid plot

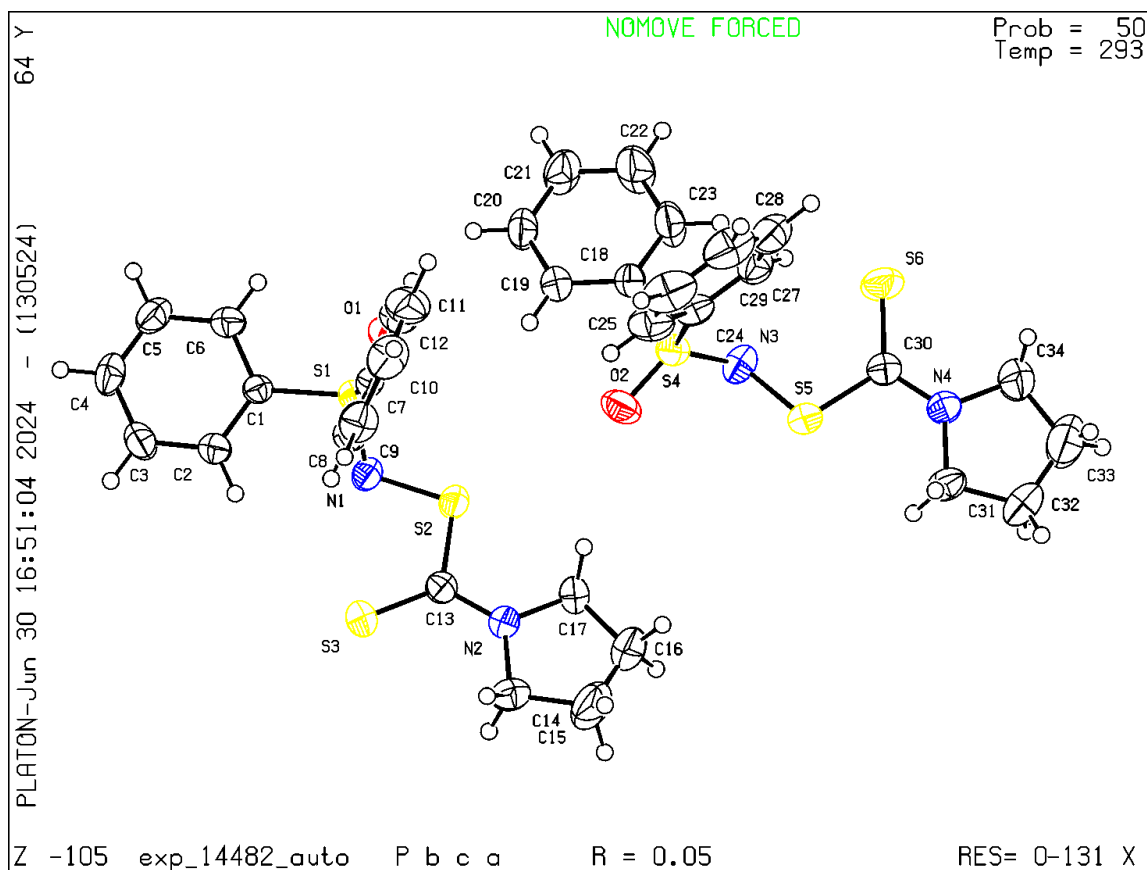

Supplement: d4qo01310g1.pdf [file d4qo01310g1.pdf]
